# Supplementary material for: The phylogeny of 48 alleles, experimentally verified at 21 kb, and its application to clinical allele detection
Source: J Transl Med. 2019 Feb 11;17:43. doi: 10.1186/s12967-019-1791-9 (PMC6371619; doi:10.1186/s12967-019-1791-9)
Supplement: Supplementary file 2 — Additional file 2. Excel file S1. List of 4243 predicted alleles of ERMAP gene. [file 12967_2019_1791_MOESM2_ESM.xlsx]

## Sheet: predicted alleles
Node	Allele	Sequence	Posterior probability	Posterior probability ≥0.1	Posterior probability ≥0.01	Posterior probability ≥0.001	Posterior probability ≥0.0001
na	SPA01	ATTGGCGCCAGGCCGCCGCCTGGCGTAGGCTCTGGCGTGGCACTCGTCACGGTCCGCCGGGGCCGGATTAAA	0.849083
na	SPA02	ATTGGCGCCAGGCCGCCACCCGGCTTAAGCTCCGACATAGTGTTTGTCACGGTCCGCCGGGGCCGGATTAAA	0.840988
B and B'	SPA03	ATTGGCGCCAGGCCGCCGCCCGGCTTAAGCTCTGGCGTGGTACTCGTCACGGTCCGCCGGGGCCGGATTAAA	0.792256
E	SPA04	ATTGGCGCCAGGCCGCCGCCCGGCTTAAGCCCTGGCGTGGTACTCGTCACGGTCCGCCGGGGCCGGATTAAA	0.747128
na	SPA05	ATTGGCGCCAGGCCGCCACCCGGCTTAAGCTCCGACATAGTGTTTGTCTCCGTCCGCCGGGGCCGGATTAAG	0.6706
C	SPA06	ATTGGCGCCAGGCCGCCACCCGGCTTAAGCTCTGGCGTGGTATTTGTCACGGTCCGCCGGGGCCGGATTAAA	0.669392
F	SPA07	ATTGGCGCCAGGCCGCCGCCTGGCGTAGGCTCTGGCGTGGTACTCGTCACGGTCCGCCGGGGCCGGATTAAA	0.625973
na	SPA08	GTTGGCGCCAAGCCGCCGCTTGGCGTAAGCTCTGGCGTGGTACTCGTCACGATCCGCCGAGGCCGGATTAAA	0.614811
D	SPA09	ATTGGCGCCAGGCCGCCACCCGGCTTAAGCTCTGACATGGTATTTGTCACGGTCCGCCGGGGCCGGATTAAA	0.608202
G	SPA10	ACTGGCGCCAGGCCGCCACCCGGCTTAAGCTCTGACATGGTATTTGTCACGGTCCGCCGGGGCCGGATTAAA	0.594046
na	SPA11	ATTGGCGCCAGGCCGCCGCCCGGCTTAAGCTCTGGCGTGATGTTCGTCACGGTCCGCCGGGGCCGGATTAAA	0.531541
na	SPA12	ACTGGCGCCAGGCCGCCGCCCGGCTTAAGCCCTGGTGTGGTACCTGTCAGGGTCCGCCGGGGCCGGATTAAA	0.521419
H	SPA13	ACTGGCGCCAGGCCGCCACCCGGCTTTAGCTCTGACATGGTATTTCTCACGGTCCGCCGGGGCCGGATTAAA	0.492312
na	SPA14	ACCGGCGCCAGGGCGCCATCCGGCTTTAGCTCTGACATGGTATTTCTCACGGTCCGCCGGGGCCGGATTAAA	0.450576
na	SPA15	ACTGGCGCCAGGCCGCCACCCGGCTTTAGCTCTGACATGGCATTTCTCAGGGTCCGCCGGGGCCGGATTAAA	0.415512
na	SPA16	ACTGGCGCCAGGCCGCCACCCGGCTTAAGCTCTGACATGGTACTTGTCACGGTCCGCCGGGGCCGGATTAAA	0.398586
na	SPA17	ATTGGCGCCAGGCCGCCGCCCGGCTTAAGCTCTGGCGTGGTATTCGTCACGGTCCGCCGGGGCCGGATTAAA	0.294026
A	SPA18	ATTGGCGCCAGGCCGCCGCCCGGCTTAAGCTCTGGCGTGGTACTTGTCACGGTCCGCCGGGGCCGGATTAAA	0.234529
na	SPA19	ATTGGCGCCAAGCCGCCGCTTGGCGTAAGCTCTGGCGTGGTACTCGTCACGATCCGCCGAGGCCGGATTAAA	0.22584
na	SPA20	ATTGGCGCCAGGCCGCCGCCTGGCGTAAGCTCTGGCGTGGTACTCGTCACGGTCCGCCGGGGCCGGATTAAA	0.147988
na	SPA21	ATTGGCGCCAGGCCGCCACCCGGCTTAAGCTCCGACATGGTGTTTGTCTCCGTCCGCCGGGGCCGGATTAAG	0.140265
na	SPA22	GTTGGCGCCAAGCCGCCGCTTGGCGTAGGCTCTGGCGTGGTACTCGTCTCCGTCCGCCAGGGCCGGATTAAG	0.116987
na	SPA23	ATTGGCGCCAAGCCGCCGCTTGGCGTAGGCTCTGGCGTGGTACTCGTCACGGTCCGCCGGGGCCGGATTAAA	0.109891
na	SPA24	ATTGGCGCCAGGCCGCCGCCCGGCTTAAGCTCTGGCGTGGTATTTGTCACGGTCCGCCGGGGCCGGATTAAA	0.109877
na	SPA25	ATTGGCGCCAGGCCGCCACCCGGCTTAAGCTCCGACATGGTGTTTGTCACGGTCCGCCGGGGCCGGATTAAA	0.106539
na	na	ATTGGCGCCAGGCCGCCGCCCGGCTTAAGCTCTGGCGTGATGTTCGTCACGGTCCGCCAGGGCCGGATTAAA	0.0882673
na	na	ATTGGCGCCAGGCCGCCACCCGGCTTAAGCTCTGGCGTGGTGTTTGTCACGGTCCGCCGGGGCCGGATTAAA	0.0812468
na	na	ATTGGCGCCAGGCCGCCACCCGGCTTAAGCTCCGACATAGTGTTTGTCTGCGTCCGCCGGGGCCGGATTAAG	0.0808193
na	na	ATTGGCGCCAGGCCGCCGCCCGGCTTAAGCTCTGGCGTGATGTTCGTCACGGTCCGCCGGGACCGGATTAAA	0.075675
na	na	ATTGGCGCCAAGCCGCCGCTTGGCGTAAGCTCTGGCGTGGTACTCGTCACGGTCCGCCGGGGCCGGATTAAA	0.0743009
na	na	ACTGGCGCCAGGCCGCCACCCGGCTTTAGCTCTGACATGGTATTTCTCAGGGTCCGCCGGGGCCGGATTAAA	0.0731777
na	na	ACTGGCGCCAGGCCGCCGCCCGGCTTAAGCCCTGGTGTGGTACCTGTCAGGGTCCGCCGAGGCCGGATTAAA	0.0668228
na	na	ACTGGCGCCAGGCCGCCACCCGGCTTAAGCTCTGGCATGGTACTTGTCACGGTCCGCCGGGGCCGGATTAAA	0.0653999
na	na	ACTGGCGCCAGGCCGCCGCCCGGCTTAAGCCCTGGTGTGGTACCTGTCAGGATCCGCCGGGGCCGGATTAAA	0.0651495
na	na	ACTGGCGCCAGGCCGCCACCCGGCTTAAGCTCTGACATGGTACTTGTCACGGTCCGCCAGGGCCGGATTAAA	0.064958
na	na	GTTGGCGCCAAGCCGCCGCTTGGCGTAAGCTCTGGCGTGGTACTCGTCACGGTCCGCCGGGGCCGGATTAAA	0.0599723
na	na	ATTGGCGCCAGGCCGCCACCCGGCTTAAGCTCTGGCATGGTATTTGTCACGGTCCGCCGGGGCCGGATTAAA	0.0598499
na	na	ACTGGCGCCAGGCCGCCACCCGGCTTAAGCTCTGACATGGTATTTGTCACGGTCCGCCAGGGCCGGATTAAA	0.0549912
na	na	ATTGGCGCCAGGCCGCCGCCCGGCTTAAGCTCTGGCGTGATGTTCGTCACGGTCTGCCGGGGCCGGATTAAA	0.0549703
na	na	ACTGGCGCCAGGCCGCCACCCGGCTTTAGCTCTGACATGGCATTTCTCAGGGTCCGCCAGGGCCGGATTAAA	0.0538188
na	na	ACCGGCGCCAGGGCGCCATCCGGCTTTAGCTCTGACATGGTATTTCTCAGGGTCCGCCGGGGCCGGATTAAA	0.0533998
na	na	ATTGGCGCCAGGCCGCCACCCGGCTTAAGCTCTGACGTGGTATTTGTCACGGTCCGCCGGGGCCGGATTAAA	0.0532833
na	na	ATTGGCGCCAGGCCGCCACCCGGCTTAAGCTCTGACATGGTGTTTGTCACGGTCCGCCGGGGCCGGATTAAA	0.0526462
na	na	ATTGGCGCCAGGCCGCCGCCCGGCTTAAGCTCTGGCGTGATACTCGTCACGGTCCGCCGGGGCCGGATTAAA	0.0436618
na	na	ATTGGCGCCAGGCCGCCGCCCGGCTTAAGCTCTGGCGTGATATTCGTCACGGTCCGCCGGGGCCGGATTAAA	0.0428527
na	na	GTTGGCGCCAAGCCGCCGCTTGGCGTAGGCTCTGGCGTGGTACTCGTCTCCGTCCGACGGGGCCGGATTAAG	0.0398592
na	na	ATTGGCGCCAGGCCGCCACCCGGCTTAAGCTCTGGCGTGGTATTTGTCACGGTCCGCCAGGGCCGGATTAAA	0.038324
na	na	ATTGGCGCCAGGCCGCCACCCGGCTTAAGCTCCGACATAGTGTTTGTCAGGGTCCGCCGGGGCCGGATTAAA	0.0370451
na	na	ACTGGCGCCAGGCCGCCACCCGGCTTTAGCTCTGACATGGCATTTCTCAGGGTCCGCCGGGACCGGATTAAA	0.0364068
na	na	ATTGGCGCCAGGCCGCCACCCGGCTTAAGCTCTGACATGGTATTTGTCACGGTCCGCCAGGGCCGGATTAAA	0.0362981
na	na	ATTGGCGCCAGGCCGCCACCCGGCTTAAGCTCCGACATAGTGTTTGTCACGGTCCGCCAGGGCCGGATTAAA	0.035312
na	na	ATTGGCGCCAGGCCGCCGCCTGGCGTAGGCTCTGGCGTGGCACTCGTTACGGTCCGCCGGGGCCGGATTAAA	0.0351753
na	na	ATTGGCGCCAGGCCGCCACCCGGCTTAAGCTCTGGCGTGGTACTTGTCACGGTCCGCCGGGGCCGGATTAAA	0.0347739
na	na	ATTGGCGCCAGGCCGCCACCCGGCTTTAGCTCTGACATGGTATTTCTCACGGTCCGCCGGGGCCGGATTAAA	0.0344533
na	na	ACTGGCGCCAGGCCGCCACCCGGCTTTAGCTCTGACATGGCATTTCTCAGGGTCCGCCGAGGCCGGATTAAA	0.033241
na	na	ATCGGCGCCAGGGCGCCATCCGGCTTTAGCTCTGACATGGTATTTCTCACGGTCCGCCGGGGCCGGATTAAA	0.0327519
na	na	ACTGGCGCCAGGCCGCCACCCGGCTTAAGCTCTGACATGGTACTTGTCAGGGTCCGCCGGGGCCGGATTAAA	0.0318162
na	na	ATTGGCGCCAGGCCGCCGCCCGGCTTAAGCTCTGGCGTGATGTTCGTCACGGTTCGCCGGGGCCGGATTAAA	0.0309965
na	na	ATTGGCGCCAGGCCGCCACCCGGCTTAAGCTCTGACATGGTACTTGTCACGGTCCGCCGGGGCCGGATTAAA	0.030394
na	na	ATTGGCACCAGGCCGCCGCCCGGCTTAAGCCCTGGCGTGGTACTCGTCAGGATCCGCCGAGGCCGGATTAAA	0.03024
na	na	GTTGGCGCCAAGCCGCCGCTTGGCGTAAGCTCTGGCGTGGTACTCGTCAGGATCCGCCGAGGCCGGATTAAA	0.0296916
na	na	ATTGGCGCCAGGCCGCCACCCGGCTGAAGCTCCGACATAGTGTTTGTCTCCGTCCGCCGGGGCCGGATTAAG	0.0296115
na	na	ACTGGCGCCAGGCCGCCACCCGGCTTTAGCTCTGACATGGCATTTCTCACGGTCCGCCAGGGCCGGATTAAA	0.0295922
na	na	ATTGGCGCCAAGCCGCCGCCTGGCGTAGGCTCTGGCGTGGTACTCGTCACGGTCCGCCGGGGCCGGATTAAA	0.0290193
na	na	ATTGGCGCCAGGCCGCCGCCCGGCTTAAGCTCTGGCGTGATGTTCGTCACGGTCCGCCAGGACCGGATTAAA	0.0282116
na	na	GTTGGCGCCAAGCCGCCGCTTGACGTAAGCTCTGGCGTGGTACTCGTCACGATCCGCCGAGGCCGGATTAAA	0.0277427
na	na	ATTGGCGCCAGGCCGCTGCCTGGCGTAGGCTCTGGCGTGGCACTCGTCACGGTCCGCCGGGGCCGGATTAAA	0.0273973
na	na	ATTGGCGCCAGGCCGCCGCCCGGCTTAAGCTCTGGCGTGATATTTGTCACGGTCCGCCGGGGCCGGATTAAA	0.0265526
na	na	ACTGGCGCCAGGGCGCCATCCGGCTTTAGCTCTGACATGGTATTTCTCACGGTCCGCCGGGGCCGGATTAAA	0.0258692
na	na	ACTGGCGCCAGGCCGCCACCCGGCTTAAGCTCTGACATGGCACTTGTCACGGTCCGCCGGGGCCGGATTAAA	0.024304
na	na	ACTGGCGCCAGGCCGCCACCCGGCTTAAGCTCTGACATGGTACTTGTCACGGTCCGCCGAGGCCGGATTAAA	0.024304
na	na	GTTGGCGCCAAGCCGCCGCTTGGCGTAGGCTCTGGCGTGGTACTCGTCACGGTCCGCCAGGGCCGGATTAAA	0.0234114
na	na	ACTGGCGCCAGGCCGCCACCCGGCTTAAGCTCTGGCATGGTATTTGTCACGGTCCGCCGGGGCCGGATTAAA	0.0231173
na	na	ATTGGCGCCAGGCCGCCACCCGGCTTAAGCTCTGGCGTGGTATTTGTCACGGTCCGCCGGGGCCGGGTTAAA	0.0229944
na	na	ACTGGCGCCAGGCCGCCACCCGGCTTAAGCTCTGACATGGCATTTGTCACGGTCCGCCGGGGCCGGATTAAA	0.0227671
na	na	ATTGGCGCCAGGCCGCCGCTTGGCGTAGGCTCTGGCGTGGTACTCGTCACGGTCCGCCGGGGCCGGATTAAA	0.0215699
na	na	ATTGGCGCCAGGCCGCCGCCCGGCTTAAGCTCTGGCGTGGTGTTCGTCACGGTCCGCCGGGGCCGGATTAAA	0.0214312
na	na	GTTGGCGCCAAGCCGCCGCTTGGCGTAAGCTCTGGCGTGGTACTCGTCACGATCCGCCGGGGCCGGATTAAA	0.0207497
na	na	ATTGGCGCCAGGCCGCCACCCGGCTTAAGCTCCGACATAGTGTTTGTCACGGTCCGCCGGGACCGGATTAAA	0.0201473
na	na	ATTGGCGCCAGGCCGCCACCCGGCTTAAGCTCTGGCATGGTACTTGTCACGGTCCGCCGGGGCCGGATTAAA	0.0195122
na	na	ACCGGCGCCAGGGCGCCACCCGGCTTTAGCTCTGACATGGTATTTCTCACGGTCCGCCGGGGCCGGATTAAA	0.0192239
na	na	ACTGGCGCCAGGCCGCCACCCGGCTTTAGCTCTGACATGGTATTTCTCACGGTCCGCCAGGGCCGGATTAAA	0.0187927
na	na	ACTGGCGCCAGGCCGCCACCCGGCTTAAGCTCTGACATGGTATTTGTCAGGGTCCGCCGGGGCCGGATTAAA	0.0182137
na	na	ATTGGCGCCAGGCCGCCGCCCGGCTTAAGCTCTGGCGTGATACTTGTCACGGTCCGCCGGGGCCGGATTAAA	0.0171092
na	na	GTTGGCGCCAAGCCGCCGCTTGGCGTAAGCTCTGGCGTGGTACTCGTCACGGTCCGCCGAGGCCGGATTAAA	0.0162788
na	na	ACTGGCGCCAGGCCGCCACCCGGCTTAAGCTCTGACATGGTACTTGTCACGGTCCGCCGGGGCCGGGTTAAA	0.0159081
na	na	ATTGGCGCCAGGCCGCCACCCGGCTTAAGCTCTGGCGTGGTATTTGTCACGGTCCGCCGGGACCGGATTAAA	0.0158406
na	na	ATTGGCGCCAGGCCGCCGCCCGGCTTAAGCTCTGGTGTGGTACTTGTCACGGTCCGCCGGGGCCGGATTAAA	0.015776
na	na	ATTGGCGCCGGGCCGCCACCCGGCTTAAGCTCCGACATAGTGTTTGTCTCCGTCCGCCGGGGCCGGATTAAG	0.0154737
na	na	ATTGGCGCCAGGCCGCCACCCGGCTTAAGCTCCGACATAGTGTTTGTCTCCGTCCGCCGGGGCCGGATTAAA	0.0148057
na	na	ATTGGCGCCAGGCCGCCACCCGGCTTTAGCTCTGACATGGTATTTCTCAGGGTCCGCCGGGGCCGGATTAAA	0.0145216
na	na	ACTGGCGCCAGGCCGCCACCCGGCTTTAGCTCTGACATGGCATTTCTCACGGTCCGCCGGGACCGGATTAAA	0.0144352
na	na	ATTGGCGCCAGGCCGCCACCCGGCTTAAGCTCTGACATGGTATTTGTCAGGGTCCGCCGGGGCCGGATTAAA	0.0144084
na	na	ACTGGCGCCAGGCCGCCACCCGGCTTAAGCTCTGACATGGTACTTGTCACGATCCGCCGGGGCCGGATTAAA	0.0141405
na	na	ACTGGCGCCAGGCCGCCACCCGGCTTTAGCTCTGACATGGCATTTCTCAGGATCCGCCGGGGCCGGATTAAA	0.0134547
na	na	ACCGGCGCCAGGGCGCCATCCGGCTTTAGCTCTGATATGGTATTTCTCAGGGTCCGCCGGGGCCGGATTAAA	0.0130533
na	na	ATTGGCGCCAGGCCGCCGCCCGGCTTAAGCTCTGGTGTGGTACTCGTCACGGTCCGCCGGGGCCGGATTAAA	0.0127764
na	na	GTTGGCGCCAGGCCGCCGCCTGGCGTAGGCTCTGGCGTGGTACTCGTCACGGTCCGCCGGGGCCGGATTAAA	0.0125639
na	na	ATTGGCGCCAGGCCGCCACCCGGCTTAAGCTCTGGCGTGGTATTTGTCACGGTCCGCCGGGGCCGGATCAAA	0.0122637
na	na	GTTGGCGCCAAGCCGCCGCTTGGCGTAGGCTCTGGCGTGGTACTCGTCTCCGTCCGCCGGGGCCGGATTAAA	0.0118876
na	na	ATTGGCGCCAGGCCGCCGCCCGGCTTAAGCTCTGGCGTGATGTTCGTCAGGGTCCGCCGGGGCCGGATTAAA	0.0117448
na	na	ATTGGCGCCAGGCCGCCGCCCGGCTTAAGCCCTGGTGTGGTACTTGTCACGGTCCGCCGGGGCCGGATTAAA	0.0115992
na	na	ATTGGCGCCAGGCCGCCGCCCGGCTTAAGCTCTGGCGTGGTACTTGTCACGGTCCGCCGGGGCCGGATTGAA	0.0115543
na	na	ATTGGCACCAGGCCGCCGCCCTGCTTAAGCCCTGGCGTGGTACTCGTCAGGGTCCGCCAGGGCCGGATTAAA	0.0112494
na	na	ATTGGCGCCAGGCCGCCGCCCGGCTTAAGCTCTGGCGTGGTACTTGTCACGGTCTGCCGGGGCCGGATTAAA	0.011221
na	na	ACCGGCGCCAGGCCGCCATCCGGCTTTAGCTCTGACATGGTATTTCTCACGGTCCGCCGGGGCCGGATTAAA	0.0111546
na	na	ACTGGCGCCAGGCCGCCACCCGGCTTAAGCTCTGGCATGGTACTTGTCACGGTCCGCCAGGGCCGGATTAAA	0.0110473
na	na	ATTGGCGCCAGGCCGCCGCCCGGCTTAAGCCCTGGCGTGGTACTTGTCACGGTCCGCCGGGGCCGGATTAAA	0.0109538
na	na	ATTGGCGCCAGGCCGCCGCCCGGCTTAAGCTCTGGCGTGGTACTTGTCACGGTCCGCCGGGGCCGGATTAGA	0.0108877
na	na	ACTGGCGCCAGGCCGCCACCCGGCTTTAGCTCTGACATGGTATTTGTCACGGTCCGCCGGGGCCGGATTAAA	0.0108581
na	na	ACTGGCGCCAGGCCGCCACCCGGCTTAAGCTCTGACATGGTACCTGTCACGGTCCGCCGGGGCCGGATTAAA	0.0106054
na	na	ATTGGCGCCAGGCCGCCACCCGGCTTAAGCTCTGACATAGTATTTGTCACGGTCCGCCGGGGCCGGATTAAA	0.0105292
na	na	ATTGGCGCCAGGCCGCCGCCCGGCTTAAGCTCTGGCGTGGTACTTGTCTCGGTCCGCCGGGGCCGGATTAAA	0.0103322
na	na	ATTGGCGCCAAGCCGCCGCCTGGCGTAAGCTCTGGCGTGGTACTCGTCACGGTCCGCCGGGGCCGGATTAAA	0.010229
na	na	ACCGGCGCCAGGGCGCCATCCGGCTTTAGCTCTGACATGGTATTTCTCACGGTCCGCCGAGGCCGGATTAAA	0.00996796
na	na	ATTGGCGCCAGGCCGCCACCCGGCTTAAGCTCCGACATAGTATTTGTCACGGTCCGCCGGGGCCGGATTAAA	0.0096956
na	na	ATTGGCGCCAGGCCGCCGCCCGGCTTAAGCTCTGGCGTGATGCTCGTCACGGTCCGCCGGGGCCGGATTAAA	0.00944424
na	na	ATTGGCGCCAGGCCGCCGCCCGGCTTAAGCTCTGACGTGGTACTTGTCACGGTCCGCCGGGGCCGGATTAAA	0.0094434
na	na	ACTGGCGCCAGGCCGCCACCCGGCTTAAGCTCTGACATGGTACTTGTCAGGGTCCGCCAGGGCCGGATTAAA	0.00927972
na	na	ATTGGCGCCAGGCCGCCGCCTGGCTTAAGCTCTGGCGTGGTACTCGTCACGGTCCGCCGGGGCCGGATTAAA	0.00927429
na	na	ATCGGCGCCAGGGCGCCATCCGGCTTTAGCTCTGATATGGTATTTCTCACGGTCCGCCGGGGCCGGATTAAA	0.00925596
na	na	ATTAGCACCAGGCCGCCGCCCTGCTTAAGCCCTGGCGTGGTACTCGTCAGGATCCGCCGAGGCCGGATTAAA	0.00900372
na	na	ATTGGCGCCAGGCCGCCGCCCGGCTTAAGCTCTGGCGTGATATTCGTCACGGTCTGCCGGGGCCGGATTAAA	0.008999
na	na	ATCGGCGCCAGGGCGCCATCCGGCTTTAGCTCTGACATGGTATTTCTCAGGGTCCGCCGGGGCCGGATTAAA	0.00889996
na	na	ATTGGCGCCAGGCCGCCGCCCGGCTTAAGCTCTGGTGTGATACTTGTCTCGGTCTGCCGGGGCCGGATTGGA	0.0088879
na	na	ATTGGCGCCAAGCCGCCGCTTGGCGTAAGCTCTGGCGTGGTACTCGTCACGGTCCGCCGAGGCCGGATTAAA	0.0087126
na	na	ATTGGCGCCAGGCCGCCGCTTGGCGTAAGCTCTGGCGTGGTACTCGTCACGGTCCGCCGGGGCCGGATTAAA	0.00856126
na	na	ATTGGCACCAGGCCGCCGCCCTGCTTAAGCCCTGGCGTGGTACTCGTCAGGATCCGCCGGGGCCGGATTAAA	0.00832
na	na	ATTGGCGCCAAGCCGCCGCTTGGCGTAAGCTCTGGCGTGGTACTCGTCACGATCCGCCGGGGCCGGATTAAA	0.0082043
na	na	ATTGGCACCAGGCCGCCGCCCTGCTTAAGCCCTGGCGTGGTACTCGTCACGGTCCGCCAGGACCGGATTAAA	0.00813787
na	na	ATTGGCACCAGGCCGCCGCCCGGCTTAAGCTCTGGCGTGGTACTCGTCACGGTCCGCCGGGGCCGGATTAAA	0.008115
na	na	ATTGGCGCCAGGCCGCCGCCCGGCTTAAGCTCTGGCGTGATACTCGTCACGGTCTGCCGGGGCCGGATTAAA	0.00788801
na	na	ATTGGCGCCAGGCCGCCGCCCGGCGTAGGCTCTGGCGTGGTACTCGTCACGGTCCGCCGGGGCCGGATTAAA	0.00778297
na	na	ATTGGCGCCAGGCCGCCACCCGGCTTAAGCTCTGACGTGGTGTTTGTCACGGTCCGCCGGGGCCGGATTAAA	0.00769231
na	na	ACTGGCGCCAGGCCGCCACCCGGCTTAAGCTCTGACATGGTATTTCTCACGGTCCGCCGGGGCCGGATTAAA	0.00768793
na	na	ACTGGCGCCAGGCCGCCACCCGGCTTAAGCTCTGACATGGTACTTGTCACGGTCCGCCAGGGCCGGGTTAAA	0.00751215
na	na	ACTGGCGCCAGGCCGCCACCCGGCTTAAGCTCTGGCATGGTACTTGTCAGGGTCCGCCGGGGCCGGATTAAA	0.00751215
na	na	ACTGGCGCCAGGCCGCCACCCGGCTTTAGCTCTGACATGGTATTTCTCAGGGTCCGCCAGGGCCGGATTAAA	0.00740319
na	na	ATTGGCGCCAAGCCGCCGCTTGACGTAAGCTCTGGCGTGGTACTCGTCACGATCCGCCGAGGCCGGATTAAA	0.00733693
na	na	GTTGGCGCCAAGCCGCCGCTTGGCGTAGGCTCTGGCGTGGTACTCGTCACGATCCGCCGAGGCCGGATTAAA	0.00722229
na	na	ATTGGCGCCAGGCCGCCACCCGGCTGAAGCTCCGACATAGTGTTTGTCTGCGTCCGCCGGGGCCGGATTAAG	0.00712457
na	na	ACCGGCGCCAGGGCGCCATCCGGCTTTAGCTCTGACATGGTATTTCTCACGATCCGCCGGGGCCGGATTAAA	0.00711997
na	na	ATTGGCGCCAGGCCGCCGCCCGGCTTAAGCCCTGGCGTGGTATTCGTCACGGTCCGCCGGGGCCGGATTAAA	0.00707988
na	na	ACTGGCGCCAGGCCGCCACCCGGCTTAAGCTCTGGCATGGTACTTGTCACGATCCGCCGGGGCCGGATTAAA	0.00707026
na	na	ATTGGCGCCAGGCCGCCGCCCGGCTTAAGCTCTGGTGTGATACTTGTCACGGTCCGCCGGGGCCGGATTAAA	0.00688812
na	na	ATTGGCGCCAGGCCGCCGCCCGGCTTAGGCTCTGGCGTGGTACTCGTCACGGTCCGCCGGGGCCGGATTAAA	0.00672386
na	na	ATTGGCGCCAGGCCGCCACCCGGCTTAAGCTCTGGCGTGGTATTTGTCAGGGTCCGCCGGGGCCGGATTAAA	0.00664282
na	na	ATTGGCGCCAGGCCGCCACCCGGCTTAAGCTCTGGCGTGGTATTCGTCACGGTCCGCCGGGGCCGGATTAAA	0.00656866
na	na	ATTGGCGCCAGGCCGCCGCCCGGCTTAAGCTCTGGCATGGTACTTGTCACGGTCCGCCGGGGCCGGATTAAA	0.00655483
na	na	ATTGGCGCCAGGCCGCCGCCCGGCTTAAGCTCTGGCGTGATGTTTGTCACGGTCCGCCGGGGCCGGATTAAA	0.00653832
na	na	ATTGGCGCCAGGCCGCCGCCCGGCTTAAGCTCTGGCGTGATGTTCGTCAGGGTCCGCCAGGGCCGGATTAAA	0.00641724
na	na	ATTGGCGCCAGGCCGCCGCCCGGCTTAAGCTCTGGCGTGATACTTGTCACGGTCTGCCGGGGCCGGATTAAA	0.00633263
na	na	ATTGGCGCCAGGCCGCCGCCCGGCTTAAGCTCTGGCGTGGTACTCGTCTCGGTCCGCCGGGGCCGGATTAAA	0.00622153
na	na	ACTGGCGCCAGGCCGCCACCCGGCTTAAGCTCTGACATGGTATTTGTCACGGTCCGCCGAGGCCGGATTAAA	0.00618648
na	na	ACTGGCGCCAGGCCGCCACCCGGCTTAAGCTCTGGCATGGTACTTGTCACGGTCCGCCGAGGCCGGATTAAA	0.00618648
na	na	ATTGGCGCCAGGCCGCCACCCGGCTTAAGCTCTGGCGTGGTGTTTGTCACGGTCCGCCGGGGCCGGGTTAAA	0.00613183
na	na	ATTGGCGCCAGGCCGCCACCCGGCTTAAGCTCTGACATAGTGTTTGTCACGGTCCGCCGGGGCCGGATTAAA	0.00608794
na	na	ATTGGCGCCAGGCCGCCGCCCGGCTTAAGCTCTGGCGTGATGTTCGTCACGGTCTGCCGGGACCGGATTAAA	0.00593292
na	na	ACTGGCGCCAGGCCGCCACCCGGCTGAAGCTCTGACATGGCATTTCTCAGGGTCCGCCAGGACCGGATTAAA	0.00583967
na	na	GTTGGCGCCAAACCGCCGCTTGGCGTAGGCTCTGGCGTGGTACTCGTCTCCGTCCGACAGGGCCGGATTAAG	0.00579151
na	na	ATTGGCGCCAGGCCGCCGCCCGGCTTAAGCTCTGGCGTGGTACTCGTCACGGTCCGCCGGGGCCGGATTAGA	0.00577714
na	na	ATTGGCACCAGGCCGCCGCCCTGCTTAAGCCCTGGCGTGGTACTCGTCAGGGTCCGCCGAGGCCGGATTAAA	0.00576
na	na	ACTGGCGCCAGGCCGCCACCCGGCTTTAGCTCTGGCATGGTATTTCTCACGGTCCGCCGGGGCCGGATTAAA	0.00569476
na	na	ATTGGCGCCAGGCCGCCGCCCGGCTTAAGCTCTGGCGTGATGTTCGTCAGGGTCCGCCGGGACCGGATTAAA	0.00569076
na	na	ATTGGCGCCAGGCCGCCGCCTGGCGTAAGCTCTGGCGTGGCACTCGTCACGGTCCGCCGGGGCCGGATTAAA	0.00557232
na	na	ATTGGCGCCAGGCCGCCGCCTGGCGTTGGCTCTGGCGTGGCACTCGTCACGGTCCGCCGGGGCCGGATTAAA	0.00557232
na	na	ACTGGCGCCAGGCCGCCACCCGGCTTTAGCTCTGACATGGTATTTCTCAGGGTCCGCCAGGACCGGATTAAA	0.00554017
na	na	ATTGGCGCCAGGCCGCCGCCCGGCTTAAGCTCTGGCGTGATGTTCGTCACGGTCTGCCAGGGCCGGATTAAA	0.0054486
na	na	GTTGGCGCCAAGCCGCCGCTTGGCGTAGGCTCTGGCGTGGTACTCGTCACGGTCCGCCGAGGCCGGATTAAA	0.00543101
na	na	ACCGGCGCCAGGGCGCCATCCGGCTTTAGCTCTGACATGGCATTTCTCACGGTCCGCCGGGGCCGGATTAAA	0.00533998
na	na	GTTGGCGCCAAGCCGCCGCTTGGCGTAGGCTCTGGCGTGGTACTCGTCACGGTCCGCCGGGACCGGATTAAA	0.00533981
na	na	ACTGGCGCCAGGCCGCCACCCGGCTTAAGCTCTGACATGGCACTTGTCACGGTCCGCCAGGGCCGGATTAAA	0.0053027
na	na	GTTGGCGCCAAGCCGCCGCTTGGCGTAGGCTCTGGCGTGGTACTTGTCTCCGTCCGACAGGGCCGGATTAAG	0.00522371
na	na	ATTGGCGCCAGGCCGCCGCCCGGCTTAAGCTCTGGCGTGATACTTGTCACGGTCCGCCGGGGCCGGATTGAA	0.00522164
na	na	ATTGGCGCCAGGCCGCCACCCGGCTTAAGCTCCGACATGGTGTTTGTCTGCGTCCGCCGGGGCCGGATTAAG	0.00512078
na	na	ATTGGCGCCAGGCCGCCACCCGGCTTAAGCTCTGGCGTGGTATTTGTCACGGTCCGCCGGAGCCGGATTAAA	0.00510986
na	na	ATTGGCGCCAGGCCGCCACCCGGCTTAAGCTCTGGCATGGTGTTTGTCACGGTCCGCCGGGGCCGGATTAAA	0.00506567
na	na	ATTGGCGCCAGGCCGCCGCCCGGCTTAAGCTCTGGCGTGGTATTCGTCACGGTCCGCCAGGGCCGGATTAAA	0.00500469
na	na	ATTGGCGCCAGGCCGCCGCCCGGCTTAAGCTCTGGCGTGGTACTCGTCACGGTCTGCCGGGGCCGGATTAAA	0.00499944
na	na	ACCGGCGCCAGGGCGCCATCCGGCTTTAGCTCTGGCATGGTATTTCTCACGGTCCGCCGGGGCCGGATTAAA	0.00498398
na	na	ACCGGCGCCAGGGCGCCATCCGGCTTTAGCTCTGACATGGTACTTCTCACGGTCCGCCGGGGCCGGATTAAA	0.00486531
na	na	ACTGGCGCCAGGCCGCCACCCGGCTTAAGCTCTGACATGGTACCTGTCACGGTCCGCCAGGGCCGGATTAAA	0.0048608
na	na	ACTGGCGCCAGGCCGCCACCCGGCTTTAGCTCTGACATGGTATTTCTCACGGTCCGCCGAGGCCGGATTAAA	0.00484055
na	na	ACTGGCGCCAGGCCGCCACCCGGCTTTAGCTCTGACATGGTACTTCTCACGGTCCGCCGGGGCCGGATTAAA	0.00484055
na	na	ACTGGCGCCAGGGCGCCATCCGGCTTTAGCTCTGATATGGTATTTCTCACGGTCCGCCGGGGCCGGATTAAA	0.00474665
na	na	ATTGGCGCCAGGCCGCCGCCCGGCTTAAGCTCTGGCGTGATGTTCGTCACGGTTTGCCGGGGCCGGATTAAA	0.00472212
na	na	ACTGGCGCCAGGCCGCCACCCGGCTTTAGCTCTGACATGGCATTTCTCACGGTCCGCCGAGGCCGGATTAAA	0.00469145
na	na	ATTGGCGCCAGGCCGCCGCCCGGCTTAAGCTCTGGTGTGGTACTTGTCACGGTCCGCCGGGGCCGGATTGAA	0.00466615
na	na	ATTGGCGCCAAGCCGCCGCTTGGCGTAGGCTCTGGCGTGGTACTCGTCACGGTCCGCCGAGGCCGGATTAAA	0.00462214
na	na	ATTGGCGCCAGGCCGCCACCCGGCTTAAGCTCTGGCGTGGTATTTGTCACGGTCCGCCAGGACCGGATTAAA	0.00459888
na	na	ATTGGTGCCAGGCCGCCACCCGGCTTAAGCTCTGGCGTGGTATTTGTCACGGTCCGCCGGGGCCGGATTAAA	0.00459888
na	na	ATTGGCGCCAGGCCGCCACCCGGCTTAAGCTCTGGCGTGGTGTTTGTCACGGTCCGCCAGGGCCGGATTAAA	0.00459888
na	na	ATTGGCGCCAGGCCGCCGCCCGGCTTAAGCTCTGGCGTGGTACTTGTCTCGGTCTGCCGGGGCCGGATTAAA	0.00455505
na	na	ATTGGCGCCAGGCCGCCGCCCGGCTTAAGCTCTGGCGTGATACTTGTCTCGGTCTGCCGGGGCCGGATTGGA	0.00455505
na	na	ATTGGCGCCAGGCCGCCGCCCGGCTTAAGCTCTGGTGTGATACTTGTCACGGTCTGCCGGGGCCGGATTGGA	0.00455505
na	na	ATTGGCGCCAGGCCGCCGCCCGGCTTAAGCTCTGGCGTGGTACTCGTCACGGTCCGCCGGGGCCGGATTGAA	0.00455505
na	na	ATTGGCGCCAGGCCGCCGCCCGGCTTAAGCTCTGGCGTGGTACTTGTCACGGTCTGCCGGGGCCGGATTAGA	0.00455505
na	na	GTTGGCGCCAAGCCGCCGCTTGGCGTAGGCTCTGGCGTGGTACTCGTCACGATCCGCCGGGGCCGGATTAAA	0.00450659
na	na	GTTGGCGCCAAGCCGCCGCTTGGAGTAAGCTCTGGCGTGGTACTCGTCACGATCCGCCGAGGCCGGATTAAA	0.00447094
na	na	ATTGGCGCCAGGCCGCCGCCCGGCTTAAGCTCTGGTGTGATACTTGTCTCGGTCTGCCGGGGCCGGATTAGA	0.00444395
na	na	ACTGGCGCCAGGCCGCCACCCGGCTTAAGCTCTGGCATGGCACTTGTCACGGTCCGCCGGGGCCGGATTAAA	0.00441891
na	na	ACCGGCGCCAGGGCGCCACCCGGCTTTAGCTCTGATATGGTATTTCTCACGGTCCGCCGGGGCCGGATTAAA	0.00439065
na	na	ATTGGCGCCAGGCCGCCGCCCGGCTTAAGCTCTGGCGTGATATTTGTCACGGTCTGCCGGGGCCGGATTAAA	0.00433285
na	na	ATTGGCGCCAGGCCGCCGCCCGGCTTAAGCTCTGGCGTGATACTTGTCTCGGTCCGCCGGGGCCGGATTAAA	0.00433285
na	na	ATTGGCGCCAGGCCGCCGCCCGGCTTAAGCTCTGGTGTGATACTTGTCTCGGTCTGCCGGGGCCGGATTGAA	0.00433285
na	na	ATTGGCGCCAGGCCGCCGCCCGGCTTAAGCTCTGGCGTGGTACTTGTCTCGGTCCGCCGGGGCCGGATTAGA	0.00433285
na	na	ATTGTCGCCAGGCCGCCGCCTGGCGTAGGCTCTGGCGTGGCACTCGTCACGGTCCGCCGGGGCCGGATTAAA	0.00429533
na	na	ACTGGCGCCAGGCCGCCACCCGGCTTAAGCTCTGACATGGCATTTCTCACGGTCCGCCGGGGCCGGATTAAA	0.00427107
na	na	ACTGGCGCCAGGCCGCCACCCGGCTTTAGCTCTGACATGGTATTTCTCACGGTCCGCCGGGACCGGATTAAA	0.00427107
na	na	ACTGGCGCCAGGCCGCCGCCCGGCTTAAGCCCTGGTGTGGTACTTGTCAGGGTCCGCCGGGGCCGGATTAAA	0.00423918
na	na	ATTGGCACCAGGCCGCCGCCCGGCTTAAGCCCTGGTGTGGTACTCGTCACGGTCCGCCGGGGCCGGATTAAA	0.0041833
na	na	ATTGGCGCCAGGCCGCCACCCGGCTTAAGCTCCGACATAGTGTTTGTCACGGTCCGCCGGGGCCGGATTAAG	0.00417136
na	na	ATTGGCGCCAGGCCGCCGCCCGGCTTAAGCTCTGGTGTGGTACTTGTCTCGGTCCGCCGGGGCCGGATTAAA	0.00411065
na	na	ATTGGCGCCAGGCCGCCGCCCGGCTTAAGCTCTGGCATGGTATTTGTCACGGTCCGCCGGGGCCGGATTAAA	0.00399956
na	na	ATTGGCGCCAGGCCGCCGCCCGGCTTAAGCTCTGGTGTGATACTTGTCTCGGTCCGCCGGGGCCGGATTGAA	0.00399956
na	na	ACTGGCGCCAGGCCGCCACCCGGCTTTAGCTCTGACATGGCATTTCTCAGGGTCCGCCAAGGCCGGATTAAA	0.00395726
na	na	ATTGGCGCCAGGCCGCCACCCGGCTTAAGCTCCGACATAGTGTTTGTCAGGGTCCGCCAGGGCCGGATTAAA	0.00394589
na	na	ACCGGCGCCAGGGCGCCATCCGGCTTTAGCTCTGACATGGTATTTCTCAGGGTCCGCCGAGGCCGGATTAAA	0.00391598
na	na	ATTGGCGCCAGGCCGCCACCCGGCTGAAGCTCCGACATAGTGTTTGTCACGGTCCGCCGGGGCCGGATTAAA	0.00389948
na	na	ATTGGCGCCAGGCCGCCGCCCGGCTTAAGCTCTGGCGTGATACTTGTCACGGTCCGCCGGGGCCGGATTAGA	0.00388846
na	na	GTTGGCGCCAAGCCGCCGCTTGGCGTAGGCTCTAGCGTGGTACTCGTCTCCGTCCGACAGGGCCGGATTAAG	0.003861
na	na	ACCGGCGCCAGGGCGCCATCCGGCTTTAGCTCTGACATGGTATTTCTCACGGTCCGCCAGGGCCGGATTAAA	0.00379732
na	na	ATTGGCGCCAGGCCGCCGCCCGGCTTAAGCTCTGGTGTGATACTTGTCACGGTCTGCCGGGGCCGGATTAAA	0.00377736
na	na	ATTGGCGCCAGGCCGCCGCCCGGCTTAAGCTCTGGCGTGATACTCGTCACGGTCCGCCGGGGCCGGATTAGA	0.00377736
na	na	ACTGGCGCCAGGCCGCCATCCGGCTTTAGCTCTGACATGGTATTTCTCACGGTCCGCCGGGGCCGGATTAAA	0.00370159
na	na	ATTGGCGCCAGGCCGCCGCCCGGCGTAAGCTCTGGCGTGGTACTCGTCACGGTCCGCCGGGGCCGGATTAAA	0.00366911
na	na	ATTGGCGCCAGGCCGCCGCCCGGCTTAAGCTCTGGCGTGGTATTTGTCACGGTCCGCCGGGGCCGGATTAGA	0.00366626
na	na	ATTGGCGCCAGGCCGCCGCCCGGCTTAAGCTCTGGTGTGGTACTTGTCACGGTCTGCCGGGGCCGGATTAAA	0.00366626
na	na	ATTGGCGCCAGGCCGCCACCCGGCTTAAGCTCTGGCGTGATGTTCGTCACGGTCCGCCGGGGCCGGATTAAA	0.0036324
na	na	ATTGGCGCCAGGCTGCCACCCGGCTTAAGCTCTGGCGTGGTATTTGTCACGGTCCGCCGGGGCCGGATTAAA	0.0035769
na	na	ATTGGCGCCAGGCCGCCACCCGGCTTAAGCTCTGGCATGGTATTTGTCACGGTCCGCCAGGGCCGGATTAAA	0.00356473
na	na	ACTGGCGCCAGGGCGCCATCCGGCTTTAGCTCTGACATGGTATTTCTCAGGGTCCGCCGGGGCCGGATTAAA	0.00355999
na	na	ATTGGCGCCAGGCCGCCGCCCGGCTTAAGCTCTGACGTGGTATTTGTCACGGTCCGCCGGGGCCGGATTAAA	0.00355516
na	na	ATTGGCGCCAGGCCGCCGCCCGGCTTAAGCTCTGGTGTGATACTTGTCACGGTCTGCCGGGGCCGGATTAGA	0.00355516
na	na	ATTGGCGCCAGGCCGCCGCCCGGCTTAAGCTCTGGCGTGGTATTTGTCACGGTCTGCCGGGGCCGGATTAAA	0.00355516
na	na	ATTGGCGCCAGGCCGCCGCCCGGCTTAAGCTCTGGTGTGATACTCGTCACGGTCCGCCGGGGCCGGATTAAA	0.00355516
na	na	ATTGGCGCCAGGCCGCCGCCCGGCTTAAGCTCTGGCGTGGTATTTGTCACGGTCCGCCGGGGCCGGATTGAA	0.00355516
na	na	ATTGGCGCCAGGCCGCCGCCCTGCTTAAGCCCTGGCGTGGTACTCGTCAGGATCCGCCGAGGCCGGATTAAA	0.00352
na	na	ACTGGCGCCAGGCCGCCACCCGGCTTAAGCTCTGACATGGTATCTGTCACGGTCCGCCGGGGCCGGATTAAA	0.00350263
na	na	ATTGGCGCCAGGCCGCCACCCGGCTTAAGCTCCGACATGGTATTTGTCACGGTCCGCCGGGGCCGGATTAAA	0.00349493
na	na	ATTGGCGCCAGGCCGCCACCCGGCTTAAGCTCTGGCGTGGTACTCGTCACGGTCCGCCGGGGCCGGATTAAA	0.00347786
na	na	ATTGGCGCCAGGCCGCCACCCGGCTTAAGCTCCGACATGGTGTTTGTCTCCGTCCGCCGGGGCCGGATTAAA	0.00345096
na	na	ATTGGCGCCAGGCCGCCGCCCGGCTTAAGCTCTGGTGTGGTACTTGTCACGGTCCGCCGGGGCCGGATTAGA	0.00344406
na	na	ATTGGCGCCAGGCCGCCGCCCGGCTTAAGCTCTGGTGTGGTACTTGTCTCGGTCTGCCGGGGCCGGATTGGA	0.00344406
na	na	ATTGGCGCCAGGCCGCCGCCCGGCTTAAGCTCTGGCGTGATACTTGTCACGGTCTGCCGGGGCCGGATTGGA	0.00344406
na	na	ACTGGCGCCAGGCCGCCGCCCGGCTTAAGCCCTGGTGTGGTACTTGTCACGGTCCGCCGGGGCCGGATTAAA	0.0034227
na	na	ACTGGCGCCAGGCCGCCACCCGGCTTTAGCTCTGACATGGTATTTCTCAGGGTCCGCCGGGACCGGATTAAA	0.00341686
na	na	ACTGGCGCCAGGCCGCCACCCGGCTTTAGCTCTGGCATGGTATTTCTCAGGGTCCGCCGGGGCCGGATTAAA	0.00341686
na	na	GTTGGCGCCAAGCCGCCGCTTGGCGTAGGCTCTGGCGTGGTACTCGTTTCCGTCCGACAGGGCCGGATTAAG	0.00340677
na	na	ATTGGCGCCAGGCCGCCGCCCGGCTTAAGCCCTGGCGTGGTACTCGTCACGGTCCGCCGAGGCCGGATTAAA	0.00333957
na	na	ATTGGCGCCAGGCCGCCGCCCGGCTTAAGCTCTGGCGTGGTACTTGTCTCGGTCCGCCGGGGCCGGATTGAA	0.00333296
na	na	ATTGGCGCCAGGCCGCCGCCCGGCTTAAGCTCTGGTGTGATACTTGTCTCGGTCCGCCGGGGCCGGATTGGA	0.00333296
na	na	ATTGGCGCCAGGCCGCCGCCCGGCTTAAGCTCTGGTGTGGTATTTGTCACGGTCCGCCGGGGCCGGATTAAA	0.00333296
na	na	ATTGGCGCCAGGCCGCCGCCCGGCTTAAGCTCTGGCGTGATACTTGTCACGGTCCGCCGGGGCCGGATTGGA	0.00333296
na	na	ATTGGCGCCAGGCCGCCGCCCGGCTTAAGCTCTGGTGTGATACTTGTCTCGGTCTGCCGGGGCCGGATTAAA	0.00333296
na	na	ACCGGCGCCAGGGCGCCACCCGGCTTTAGCTCTGACATGGTATTTCTCAGGGTCCGCCGGGGCCGGATTAAA	0.00332265
na	na	ATTGGCGCCAGGCCGCCGCCCGGCTTAAGCTCTGGCGTGATGTTCGTCACGGTCCCCCGGGGCCGGATTAAA	0.00326916
na	na	ACTGGCGCCAGGCCGCCACCCGGCTTTAGCTCTGACATGGCATTTCTCACGGTCCGCCAGGACCGGATTAAA	0.00324792
na	na	ATTGGCGCCAAGCCGCCGCTTGGCGTAGGCTCTGGCGTGGTACTCGTCACGATCCGCCGGGGCCGGATTAAA	0.0032355
na	na	ACTGGCGCCAGGCCGCCGCCCGGCTTAAGCCCTGGTGTGGTACCCGTCAGGGTCCGCCGGGGCCGGATTAAA	0.00323516
na	na	ACTGGCGCCAGGCCGCCGCCCGGCTTAAGCCCTGGTGTGGTACCTGTCAGGATCCGCCGAGGCCGGGTTAAA	0.00323516
na	na	ATTGGCGCCAGGCCGCCGCCCGGCTTAAGCCCTGGTGTGGTACCTGTCAGGGTCCGCCGGGGCCGGATTAAA	0.00323516
na	na	ATTGGCGCCAGGCCGCCGCCCGGCTTAAGCTCTGGCGTGATACTTGTCACGGTCTGCCGGGGCCGGATTAGA	0.00322186
na	na	ACTGGCGCCAGGGCGCCACCCGGCTTTAGCTCTGACATGGTATTTCTCACGGTCCGCCGGGGCCGGATTAAA	0.00320399
na	na	ATTGGCGCCAGGCCGCCACCCGGCTTAAGCTCTGACGTGGTACTTGTCACGGTCCGCCGGGGCCGGATTAAA	0.00318949
na	na	ACTGGCGCCAGGCCGCCACCCGGCTTTAGCTCTGACATGGCATTTCTCAGGGTCCGCCGAGACCGGATTAAA	0.00316581
na	na	ACTGGCGCCAGGCCGCCACCCGGCTTAAGCTCTGACATGGTGTTTGTCACGGTCCGCCGGGGCCGGATTAAA	0.00315236
na	na	ACTGGCGCCAGGCCGCCACCCGGCTTAAGCTCTGACATGGTATTTGTCAGGGTCCGCCAGGGCCGGATTAAA	0.00315236
na	na	ACCGGCGCCAGGCCGCCACCCGGCTTTAGCTCTGACATGGTATTTCTCACGGTCCGCCGGGGCCGGATTAAA	0.00313212
na	na	ACTGGCGCCAGGCCGCCACCCGGCTTAAGCTCTGACATGGCATTTCTCAGGGTCCGCCAGGGCCGGATTAAA	0.00313212
na	na	ATTGGCGCCAGGCCGCCGCCCGGCTTAAGCTCTGGCGTGGTGCTCGTCACGGTCCGCCGGGGCCGGATTAAA	0.00312793
na	na	ACTGGCGCCAGGCCGCCACCCGGCTTAAGCTCTGACATGGTACTTGTCAGGATCCGCCGGGGCCGGATTAAA	0.00309324
na	na	ACCGGCGCCAGGGCGCCATCCGGCTTTAGCTCTGACATGGTATTTCTCACGGTCCGCCGGGGCCGAATTAAA	0.00308532
na	na	ATTGGCGCCAGGCCGCCACCCGGCTTAAGCTCTGGCGTGGTGTTTGTCACGGTCCGCCGGGACCGGATTAAA	0.00306592
na	na	ATTGGCGCCAGGCCGCCGCCCGGCTTAAGCCCTGGTGTGGTACTCGTCAGGGTCCGCCGGGGCCGGATTAAA	0.0030424
na	na	ATTGGCGCCAGGCCGCCGCCCGGCTTAAGCTCTGGCGTGATGTTCGTCACGGTTCGCCAGGGCCGGATTAAA	0.003027
na	na	ATTGGCGCCAAGCCGCCGCCTGGCGTAGGCTCTGGCGTGGCACTCGTCACGGTCCGCCGGGGCCGGATTAAA	0.00301834
na	na	ATTGGCGCCAGGCCGCCGCCCGGCTTAAGCTCTGGCGTGGTACTTGTCACGGTCTGCCGGGGCCGGATTGAA	0.00299967
na	na	ATTGGCGCCAGGCCGCCGCCCGGCTTAAGCTCTGGCGTGATACTTGTCTCGGTCCGCCGGGGCCGGATTAGA	0.00299967
na	na	ACCGGCGCCAGGGCGCCATCCGGCTTTAGCTCTGACATGGTATTTCTCAGGATCCGCCGGGGCCGGATTAAA	0.00296665
na	na	ATTGGCGCCAGGCCGCCACCCGGCTTAAGCTCCGACATGGTGTTTGTCACGGTCCGCCAGGGCCGGATTAAA	0.00293123
na	na	ATTGGCGCCAGGCCGCCGCCCTGCTTAAGCCCTGGCGTGGTACTCGTCACGGTCCGCCGGGGCCGGATTAAA	0.00291363
na	na	ACTGGCGCCAGGCCGCCGCCCGGCTTAAGCCCTGGTGTGGTACCTGTCAGGGTCCGCCGAGGCCGGGTTAAA	0.00290049
na	na	ATTGGCGCCAGGCCGCCACCCGGCTTAAGCTCCGACATAGTGTTTGTCTCGGTCCGCCGGGGCCGGATTAAG	0.00289436
na	na	ATTGGCGCCAGGCCGCCACCCGGCTTAAGCTCTGGCGTGATATTTGTCACGGTCCGCCGGGGCCGGATTAAA	0.00288857
na	na	ATTGGCGCCAGGCCGCCACCCGGCTTTAGCTCTGACATGGCATTTCTCACGGTCCGCCGGGGCCGGATTAAA	0.00288704
na	na	ATTGGCGCCAGGCCGCCACCCGGCTTTAGCTCTGGCATGGTATTTCTCAGGGTCCGCCGGGGCCGGATTAAA	0.00284738
na	na	ACTGGCGCCAGGCCGCCACCCGGCTTTAGCTCTGATATGGTATTTCTCACGGTCCGCCGGGGCCGGATTAAA	0.00284738
na	na	ACTGGCGCCAGGCCGCCACCCGGCTTAAGCTCTGACATGGCATTTCTCAGGGTCCGCCGGGGCCGGATTAAA	0.00284738
na	na	GTTGGCGCCAAGCCGCCGCTTGGCGTAGGCTCTGGCGTGGTACTCGTCACGGTCCGCCGGGGCCGGATTAAG	0.00282995
na	na	ATTGGCGCCAGGCCGCCACCCGGCTTAAGCTCTGACATGGTACTTGTCACGGTCCGCCAGGGCCGGATTAAA	0.00281426
na	na	ACTGGCGCCAGGCCGCCACCCGGCTTAAGCTCTGACATGGCATTTGTCAGGGTCCGCCGGGGCCGGATTAAA	0.0028021
na	na	ATTGGCGCCAGGCCGCCGCCCGGCTTAAGCTCTGGCGTGGTGTTTGTCACGGTCCGCCGGGGCCGGATTAAA	0.00277747
na	na	ATTGGCGCCAGGCCGCCGCCCGGCTTAAGCTCTGGCGTGATACTTGTCTCGGTCTGCCGGGGCCGGATTGAA	0.00277747
na	na	ATTGGCGCCAGGCCGCCGCCCGGCTTAAGCTCTGGTGTGATACTTGTCACGGTCTGCCGGGGCCGGATTGAA	0.00277747
na	na	ATTGGCGCCAGGCCGCCACCCGGCTTAAGCTCTGGCATGGTATTTGTCAGGGTCCGCCGGGGCCGGATTAAA	0.00277085
na	na	ATTGGCGCCAGGCCGCCGCCCGGCTTAAGCTCTGGCGTGATACTTGTCTCGGTCCGCCGGGGCCGGATTGGA	0.00266637
na	na	ATTGGCGCCAGGCCGCCGCCCGGCTTAAGCTCTGGCGTGATACTTGTCACGGTCTGCCGGGGCCGGATTGAA	0.00266637
na	na	ACTGGCGCCAGGCCGCCACCCGGCTTAAGCTCTGACATGGTACTTGTCAGGGTCCGCCGAGGCCGGATTAAA	0.00265135
na	na	ACTGGCGCCAGGCCGCCACCCGGCTTAAGCTCTGGCATGGTACTTGTCACGGTCCGCCGGGGCCGGGTTAAA	0.00265135
na	na	ACTGGCGCCAGGCCGCCACCCGGCTTAAGCTCTGACATGGCACTTGTCACGGTCCGCCGAGGCCGGATTAAA	0.00265135
na	na	ACTGGCGCCAGGCCGCCACCCGGCTTAAGCTCTGACATGGCACTTGTCAGGGTCCGCCGGGGCCGGATTAAA	0.00265135
na	na	ACTGGCGCCAGGCCGCCACCCGGCTTAAGCTCTGGCATGGTACTTGTCAGGGTCCGCCAGGGCCGGATTAAA	0.00265135
na	na	ACCGGCGCCAGGGCGCCATCCGGCTTTAGCTCTGATATGGTATTTCTCACGGTCCGCCGAGGCCGGATTAAA	0.00261066
na	na	ACCGGCGCCAGGGCGCCATCCGGCTTTAGCTCTGGCATGGTATTTCTCAGGGTCCGCCGGGGCCGGATTAAA	0.00261066
na	na	ATTGGCGCCAGGCCGCCACCCGGCTTAAGCTCCGACATGGTGTTTGTCAGGGTCCGCCGGGGCCGGATTAAA	0.00259301
na	na	ATTGGCGCCAGGCCGCCGCCCGGCTTAAGCTCTGGTGTGATACTTGTCACGGTCCGCCGGGGCCGGATTGAA	0.00255527
na	na	ATTGGCGCCAGGCCGCCGCCCGGCTTAAGCTCTGGCGTGATACTCGTCTCGGTCCGCCGGGGCCGGATTAAA	0.00255527
na	na	ATTGGCGCCAGGCCGCCGCCCGGCTTAAGCTCTGGCGTGATACTTGTCTCGGTCTGCCGGGGCCGGATTAAA	0.00255527
na	na	ATTGGCGCCAGGCCGCCGCCCGGCTTAAGCTCTGGCGTGGTACTTGTCACGGTCCGCCGGGGCCGGATTGGA	0.00255527
na	na	ATTGGCGCCAGGCCGCCACCCGGCTTAAGCTCTGGCGTGGTGTTTGTCACGGTCCGCCGGGGCCGGATCAAA	0.00255493
na	na	ATTGGCGCCAGGCCGCCGCCCGGCTTAAGCTCTGGCGTGGTACTCGTCACGGTCCGCCAGGGCCGGATTAAA	0.00255043
na	na	ATTGGCACCAGGCCGCCGCCCTGCTTAAGCCCTGGCGTGGTACTCGCCAGGATCCGCCGAGGCCGGATTAAA	0.00254453
na	na	ACTGGCGCCAGGCCGCCACCCGGCTTTAGCTCTGACATGGCATTTCTCACGATCCGCCGGGGCCGGATTAAA	0.00252616
na	na	ACTGGCGCCAGGCCGCCACCCGGCTTAAGCTCTGACATGGTATTTGTCACGGTCCGCCGGGGCCGGGTTAAA	0.00245184
na	na	ACTGGCGCCAGGCCGCCACCCGGCTTGAGCTCTGACATGGTATTTGTCACGGTCCGCCGGGGCCGGATTAAA	0.00245184
na	na	ATTGGCGCCAGGCCGCCGCCCGGCTTAAGCTCTGGCGTGGTACTTGTCACGGTCCGCCAGGGCCGGATTAAA	0.00244417
na	na	ATTGGCGCCAGGCCGCCGCCCGGCTTAAGCTCTGGTGTGATACTTGTCTCGGTCCGCCGGGGCCGGATTAGA	0.00244417
na	na	ATTGGCGCCAGGCCGCCGCCCGGCTTAAGCTCTGGCGTGATGTTCGTCACGGTTCGCCGGGACCGGATTAAA	0.0024216
na	na	ATTGGCGCCAGGCCGCCGCCCGGCTTAAGCTCTGGCGTGATATTCGTCACGGTCCGCCGGGACCGGATTAAA	0.0024216
na	na	ATTGGCACCAGGCCGCCGCCCTGCTTAAACCCTGGCGTGGTACTCGTCACGGTCCGCCGGGGCCGGATTAAA	0.00241546
na	na	ATTGGCGCCAGGCCGCCGCCCGGCTTAAGCTCTGGTGTGGTACTTGTCACGGTCTGCCGGGGCCGGATTGGA	0.00233307
na	na	ATTGGCGCCAGGCCGCCGCCCGGCTTAAGCTCTGGTGTGATACTTGTCACGGTCCGCCGGGGCCGGATTGGA	0.00233307
na	na	ATTGGCGCCAGGCCGCCGCCCGGCTTAAGCTCTGGCGTGATACTTGTCTCGGTCTGCCGGGGCCGGATTAGA	0.00233307
na	na	ATTGGCGCCAGGCCGCCGCCCGGCTTAAGCTCTGGCGTGGTACTTGTCTCGGTCTGCCGGGGCCGGATTGAA	0.00233307
na	na	ATTGGCGCCAGGCCGCCGCCCGGCTTAAGCTCTGGTGTGGTACTCGTCACGGTCTGCCGGGGCCGGATTAAA	0.00233307
na	na	ATTGGCGCCAGGCCGCCGCCCGGCTTAAGCTCTGGTGTGATACTTGTCACGGTCCGCCGGGGCCGGATTAGA	0.00233307
na	na	ATTGGCGCCAGGCCGCCGCCCGGCTTAAGCTCTGGTGTGGTACTTGTCTCGGTCTGCCGGGGCCGGATTGAA	0.00233307
na	na	ATTGGCGCCAGGCCGCCGCCCGGCTTAAGCTCTGGCGTGATATTCGTCACGGTCCGCCAGGGCCGGATTAAA	0.00230052
na	na	ATTGGCGCCAGGCCGCCACCCGGCTTTAGCTCTGACATGGTATTTCTCAGGGTCCGCCAGGGCCGGATTAAA	0.0022779
na	na	ACCGGCGCCAGGCCGCCATCCGGCTTTAGCTCTGATATGGTATTTCTCACGGTCCGCCGGGGCCGGATTAAA	0.00225466
na	na	ACTGGCGCCAGGCCGCCACCCGGCTTAAGCTCTGGCGTGGTATTTGTCACGGTCCGCCGGGGCCGGATTAAA	0.00225141
na	na	ACTGGCGCCAGGCCGCCGCCCGGCTTAAGCCCTGGTGTGGTACTTGTCAGGATCCGCCGAGGCCGGATTAAA	0.00223115
na	na	GTTGGCGCCAAGCCGCCGCTTGGCGTAGGCTCTGGCGTGGTACTCGTCTCGGTCCGCCGGGGCCGGATTAAG	0.00222198
na	na	ATTGGCGCCAGGCCGCCGCCCGGCTTAAGCTCTGGTGTGATACTTGTCTCGGTCCGCCGGGGCCGGATTAAA	0.00222198
na	na	ATTGGCGCCAGGCCGCCGCCCGGCTTAAGCTCTGGTGTGATACTCGTCTCGGTCTGCCGGGGCCGGATTGGA	0.00222198
na	na	ATTGGCGCCAGGCCGCCGCCCGGCTTAAGCTCTGGTGTGGTACTTGTCACGGTCCGCCGGGGCCGGATTGGA	0.00222198
na	na	ATTGGCGCCAGGCCGCCGCCCGGCTTAAGCTCTGGCGTGGTACTTGTCGCGGTCCGCCGGGGCCGGATTAAA	0.00222198
na	na	ATTGGCGCCAGGCCGCCGCCCGGCTTAAGCTCTGGCGTGATACTCGTCACGGTCCGCCGGGGCCGGATTGAA	0.00222198
na	na	ATTGGCGCCAGGCCGCCGCCCGGCTTAAGCTCTGGCGTGGTATTTGTCTCGGTCCGCCGGGGCCGGATTAAA	0.00222198
na	na	ACTGGCGCCAGGCCGCCACCCGGCTTAAGCTCTGGCATGGTACTTGTCAGGGTCCGCCGAGGCCGGATTAAA	0.00220946
na	na	ATTGGCGCCAGGCCGCCACCCGGCTTAAGCTCTGACATGGCACTTGTCACGGTCCGCCGGGGCCGGATTAAA	0.00220946
na	na	ACTGGCGCCAGGCCGCCACCCGGCTTAAGCTCTGACATGGTACTTGTCACGATCCGCCGAGGCCGGATTAAA	0.00220946
na	na	ACTGGCGCCAGGCCGCCACCCGGCTTAAGCTCTGGCATGGTACTTGTCAGGATCCGCCGGGGCCGGATTAAA	0.00220946
na	na	ACTGGCGCCAGGCCGCCACCCGGCTTAAGCTCTGACATGGTACTTGTCACGATCCGCCAGGGCCGGATTAAA	0.00220946
na	na	ATTGGCGCCAGGCCGCCGCCCGGCTTAAGCTCTGGCGTGGTATTCGTCACGGTCTGCCGGGGCCGGATTAAA	0.00218955
na	na	ATTGGCGCCAGGCCGCCACCCGGCTTAAGCTCCGACATAGTGTTTGTCACGGTCCGCCAGGACCGGATTAAA	0.00216638
na	na	ACCGGCGCCAGGGCGCCATCCGGCTTTAGCTCTGATATGGTATTTCTCACGATCCGCCGGGGCCGGATTAAA	0.00213599
na	na	ATTGGCGCCAGGGCGCCATCCGGCTTTAGCTCTGACATGGTATTTCTCACGGTCCGCCGGGGCCGGATTAAA	0.00213599
na	na	ACCGGCGCCAGGGCGCCATCCGGCTTTAGCTCTGATATGGCATTTCTCACGGTCCGCCGGGGCCGGATTAAA	0.00213599
na	na	ATTGGCGCCAGGCCGCCGCCCGGCTTAAGCCCTGGTGTGGTACCTGTCAGGATCCGCCGAGGCCGGATTAAA	0.00211959
na	na	ACTGGCGCCAGGCCGCCGCCCGGCTTAAGCCCTGGTGTGGTACCTGTCAGGATCCGCCGGGGCCGGGTTAAA	0.00211959
na	na	ATTGGCGCCAGGCCGCCGCCTGGCGTAAGCTCTGGCGTGGTACTCGTCACGATCCGCCGGGGCCGGATTAAA	0.00211252
na	na	ATTGGCGCCAGGCCGCCGCCCGGCTTAAGCTCTGGCGTGGTATTTGTCACGGTCCGCCAGGGCCGGATTAAA	0.00211088
na	na	ATTGGCGCCAGGCCGCCGCCCGGCTTAAGCTCTGGCGTGATATTTGTCTCGGTCCGCCGGGGCCGGATTAAA	0.00211088
na	na	ATTGGCGCCAGGCCGCCGCCCGGCTTAAGCTCTGGTGTGGTACTCGTCACGGTCCGCCGGGGCCGGATTGAA	0.00211088
na	na	ACTGGCGCCAGGCCGCCACCCGGCTTAAGCTCTGACGTGGTATTTGTCACGGTCCGCCGGGGCCGGATTAAA	0.00210158
na	na	ATTGGCACCAGGCCGCCGCCCTGCTTAAGCCCTGGCGTGGTACTCGTCACGGTCCGCCGAGGCCGGATTAAA	0.00208388
na	na	ATTGGCGCCAGGCCGCCGCCCGGCTTAAGCTCTGGCGTGGTGTTCGTCACGGTCCGCCGGGACCGGATTAAA	0.00205836
na	na	ATTGGCGCCAGGCCGCCACCCGGCTTGAGCTCTGGCGTGGTATTTGTCACGGTCCGCCGGGGCCGGATTAAA	0.00204394
na	na	ACCGGCGCCAGGGCGTCATCCGGCTTTAGCTCTGACATGGTATTTCTCACGGTCCGCCGGGGCCGGATTAAA	0.00201733
na	na	ATTGGCGCCAGGCCGCCGCCCGGCTTAAGCCCTGGCGTGGTACTCGTCACGATCCGCCGGGGCCGGATTAAA	0.00200374
na	na	ATTGGCGCCAGGCCGCCGCCTGGCGTAGGCTCTGGCGTGGTACTCGTTACGGTCCGCCGGGGCCGGATTAAA	0.00200133
na	na	ATTGGCGCCAGGCCGCCGCCCGGCTTAAGCTCTGGTGTGATACTCGTCACGGTCTGCCGGGGCCGGATTAAA	0.00199978
na	na	ATTGGCGCCAGGCCGCCGCCCGGCTTAAGCTCTGGCGTGATACTTGTCTCGGTCCGCCGGGGCCGGATTGAA	0.00199978
na	na	ATTGGCGCCAGGCCGCCGCCCGGCTTAAGCTCTGGCGTGATACTCGTCTCGGTCTGCCGGGGCCGGATTAAA	0.00199978
na	na	ATTGGCGCCAGGCCGCCGCCCGGCTTAAGCTCTGGTGTGGTACTTGTCACGGTCTGCCGGGGCCGGATTGAA	0.00199978
na	na	ATTGGCGCCAGGCCGCCGCCCGGCTTAAGCTCTGGTGTGATATTTGTCACGGTCCGCCGGGGCCGGATTAAA	0.00199978
na	na	ATTGGCGCCAGGCCGCCGCCCGGCTTAAGCTCTGGTGTGGTACTTGTCTCGGTCCGCCGGGGCCGGATTGGA	0.00199978
na	na	ACTGGCGCCAGGCCGCCACCCGGCTTAAGCTCTGACATGGTATTTCTCACGGTCCGCCAGGGCCGGATTAAA	0.00199317
na	na	ACTGGCGCCAGGCCGCCACCCGGCTTTAGCTCTGACATGGTATTTCTCAGGATCCGCCGGGGCCGGATTAAA	0.00199317
na	na	ATTGGCGCCAGGCCGCCGCCTGGCGTGGGCTCTGGCGTGGCACTCGTCACGGTCCGCCGGGGCCGGATTAAA	0.00197353
na	na	ATTGGCACCAGGCCGCCGCCCTGCTTAAGCCCTGGCGTGGTACTCGTCACGGCCCGCCGGGGCCGGATTAAA	0.0019084
na	na	ATTGGCGCCGGGCCGCCACCCGGCTTAAGCTCCGACATGGTGTTTGTCTCCGTCCGCCGGGGCCGGATTAAG	0.00189246
na	na	ATTGGCGCCAGGCCGCCGCCCGGCTTAAGCTCTGACATGGTACTTGTCACGGTCCGCCGGGGCCGGATTAAA	0.00188868
na	na	ATTGGCGCCAAGCCGCCGCCCGGCTTAAGCTCTGGCGTGGTACTCGTCACGGTCCGCCGGGGCCGGATTAAA	0.00185486
na	na	ATTGGCGCCAGGCCGCCGCCCGGCTTAAGCTCTGGCGTGATGTTCGTCATGGTCCGCCGGGGCCGGATTAAA	0.0018162
na	na	ATTGGCGCCAGGCCGCCACCCGGCTTAAGCTCCGGCATAGTGTTTGTCACGGTCCGCCGGGGCCGGATTAAA	0.00180383
na	na	ATCGGCGCCAGGGCGCCACCCGGCTTTAGCTCTGACATGGTATTTCTCACGGTCCGCCGGGGCCGGATTAAA	0.00177999
na	na	ACCGGCGCCAGGGCGCCATCCGGCTTTAGCTCTGACATGGCATTTCTCAGGGTCCGCCGGGGCCGGATTAAA	0.00177999
na	na	ACCGGCGCCAGGGCGCCATCCGGCTTTAGCTCTGATATGGTACTTCTCACGGTCCGCCGGGGCCGGATTAAA	0.00177999
na	na	ATTGGCGCCAGGCCGCCGCCCGGCTTAAGCTCTGGCGTGGTACTTGTCTCGGTCCGCCGGGGCCGGATTGGA	0.00177758
na	na	ATTGGCGCCAGGCCGCCGCCCGGCTTAAGCTCTGGTGTGATATTTGTCACGGTCTGCCGGGGCCGGATTGGA	0.00177758
na	na	ATTGGCGCCAGGCCGCCGCCCGGCTTAAGCTCTGGCGTGGTATTTGTCACGGTCTGCCGGGGCCGGATTGAA	0.00177758
na	na	ATTGGCGCCAGGCCGCCGCCCGGCTTAAGCTCTGGTGTGGTACTTGTCACGGTCTGCCGGGGCCGGATTAGA	0.00177758
na	na	ATTGGCGCCAGGCCGCCGCCCGGCTTAAGCTCTGGCGTGATATTTGTCTCGGTCTGCCGGGGCCGGATTGGA	0.00177758
na	na	ATTGGCGCCAGGCCGCCGCCCGGCTTAAGCTCTGGCGTGATATTTGTCACGGTCCGCCGGGGCCGGATTGAA	0.00177758
na	na	ACTGGCGCCAGGCCGCCACCCGGCTTAAGCTCTGGCATGGTACTTGTCACGATCCGCCGAGGCCGGATTAAA	0.00176757
na	na	ACTGGCGCCAGGCCGCCACCCGGCTTAAGCTCTGACATGGTACCTGTCAGGGTCCGCCGGGGCCGGATTAAA	0.00176757
na	na	ATTGGCACCAGGCCGCCGCCCTGCTTAAGCCCTGGCGTGGTACTCGTCAGGGTCCGCCGGGGCCGGATTAAA	0.00176574
na	na	ACTGGCGCCAGGCCGCCACCCGGCTTAAGCTCTGGCATGGTATTTGTCACGGTCCGCCAGGGCCGGATTAAA	0.00175131
na	na	ACTGGCGCCAGGCCGCCACCCGGCTTAAGCTCTGACATGGTATCTGTCACGGTCCGCCAGGGCCGGATTAAA	0.00175131
na	na	ACTGGCGCCAGGCCGCCACCCGGCTTAAGCTCTGACATGGCATTTGTCACGGTCCGCCAGGGCCGGATTAAA	0.00175131
na	na	ACTGGCGCCAGGCCGCCACCCGGCTTAAGCTCTGACATGGTATTTGTCACGATCCGCCGGGGCCGGATTAAA	0.00175131
na	na	ATTGGCGCCAGGCCGCCACCCGGCTTAAGCTCTGACGTGGTATTTGTCACGGTCCGCCAGGGCCGGATTAAA	0.00168856
na	na	ATTGGCGCCAGGCCGCCACCCGGCTTAAGCTCTGGCGTGGTGTTCGTCACGGTCCGCCGGGGCCGGATTAAA	0.00168856
na	na	ATTGGCACCAGGCCGCCGCCCTGCTTAAGCCCTGGCGTGGTACTCGTCAGGGTCCGCCGGGACCGGATTAAA	0.00166871
na	na	ATTGGCGCCAGGCCGCCGCCTGGCGTAGGCTCTGGCGTGGTATTCGTCACGGTCCGCCGGGGCCGGATTAAA	0.00166778
na	na	GTTGGCGCCAGGCCGCCGCCTGGCGTAAGCTCTGGCGTGGTACTCGTCACGGTCCGCCGGGGCCGGATTAAA	0.00166778
na	na	GTTGGCGCCAAGCCGCCGCCTGGCGTAGGCTCTGGCGTGGTACTCGTCACGGTCCGCCGGGGCCGGATTAAA	0.00166778
na	na	ATTGGCGCCAGGCCGCCGCCCGGCTTAAGCTCTGGTGTGGTATTTGTCACGGTCTGCCGGGGCCGGATTAAA	0.00166648
na	na	ATTGGCGCCAGGCCGCCGCCCGGCTTAAGCTCTGGTGTGGTACTTGTCTCGGTCTGCCGGGGCCGGATTAGA	0.00166648
na	na	ATTGGCGCCAGGCCGCCACCCGGCTTAAGCTCTGGCGTGGTACTTGTCACGGTCCGCCGGGGCCGGATTAGA	0.00166648
na	na	ATTGGCGCCAGGCCGCCGCCCGGCTTAAGCTCTGGCGTGATATTTGTCACGGTCCGCCGGGGCCGGATTAGA	0.00166648
na	na	ATTGGCGCCAGGCCGCCACCCGGCTTAAGCTCTGGCGTGGTATTTGTCACGGTCTGCCGGGGCCGGATTAAA	0.00166648
na	na	ATTGGCGCCAGGCCGCCGCCCGGCTTAAGCTCTGGCGTGATACTCGTCACGGTCTGCCGGGGCCGGATTGAA	0.00166648
na	na	ATTGGCGCCAGGCCGCCACCCGGCTTAAGCTCTGGCGTGGTATTTGTCACGGTCCGCCGGGGCCGGATTAGA	0.00166648
na	na	ATTGGCGCCAGGCCGCCACCCGGCTTAAGCTCTGGCGTGGTACTTGTCACGGTCCGCCGGGGCCGGATTGAA	0.00166648
na	na	ATTGGCGCCAGGCCGCCGCCCGGCTTAAGCTCTGGTGTGGTACTTGTCTCGGTCCGCCGGGGCCGGATTGAA	0.00166648
na	na	ATTGGCGCCAGGCCGCCACCCGGCTTAAGCTCTGACATGGCATTTGTCACGGTCCGCCGGGGCCGGATTAAA	0.00166251
na	na	ATTGGCGCCAGGCCGCCACCCGGCTTAAGCTCTGACATGGTATTTGTCAGGGTCCGCCAGGGCCGGATTAAA	0.00166251
na	na	ACCGGCGCCAGGGCGCCATCCGGCTTTAGCTCTGACATGGTATCTCTCACGGTCCGCCGGGGCCGGATTAAA	0.00166133
na	na	ATCGGCGCCAGGGCGCCATCCGGCTTTAGCTCTGGCATGGTATTTCTCACGGTCCGCCGGGGCCGGATTAAA	0.00166133
na	na	ATTGGCGCCAGGCCGCCGCTTGGCGTAGGCTCTGGCGTGGCACTCGTCACGGTCCGCCGGGGCCGGATTAAA	0.00162526
na	na	ATTGGCGCCAGGCCGCCGCCCGGCTTAAGCTCTGGCGTGGTACTCGTCACGATCCGCCGGGGCCGGATTAAA	0.001623
na	na	ATTGGCGCCAGGCCGCCGCCCGGCTTAAGCTCTGGCGTGATGTTCGTCACGGTCTCCCGGGGCCGGATTAAA	0.00157404
na	na	ATTGGCGCCAGGCCGCCGCCCGGCTTAAGCTCTGGCGTGATGTTTGTCACGGTCCGCCAGGGCCGGATTAAA	0.00157404
na	na	ATTGGCGCCAGGCCGCCGCCCGGCTTAAGCTCTGACGTGGTACTCGTCACGGTCCGCCGGGGCCGGATTAAA	0.00156397
na	na	ATTGGCGCCAGGCCGCCACCCGGCTTAAGCTCCGACATAGTGTTTGTCTGCGTCCGCCGGGGCCGGATTAAA	0.0015585
na	na	ATTGGCGCCAGGCCGCCGCCCGGCTTAAGCTCTGGTGTGATACTCGTCACGGTCCGCCGGGGCCGGATTGGA	0.00155538
na	na	ATTGGCGCCAGGCCGCCACCCGGCTTAAGCTCTGGCGTGGTATTTGTCTCGGTCCGCCGGGGCCGGATTAAA	0.00155538
na	na	ATTGGCGCCAGGCCGCCGCCCGGCTTAAGCTCTGGCGTGGTACTCGTCTCGGTCCGCCGGGGCCGGATTAGA	0.00155538
na	na	ATTGGCGCCAGGCCGCCACCCGGCTTAAGCTCTGGCGTGGTATTTGTCACGGTCCGCCGGGGCCGGGTCAAA	0.00153296
na	na	ATTGGCGCCAGGCCGCCACCCGGCTTTAGCTCTGGCGTGGTATTTGTCACGGTCCGCCGGGGCCGGATTAAA	0.00153296
na	na	ATTGGTGCCAGGCCGCCACCCGGCTTAAGCTCTGGCGTGGTGTTTGTCACGGTCCGCCGGGGCCGGATTAAA	0.00153296
na	na	ATTGGCGCCAGGCCGCCACCCGGCTTAAGCTCTGACGTGGTATTTGTCACGGTCCGCCGGGGCCGGGTTAAA	0.00153296
na	na	ATTGGCGCCAGGCCGCCACCCGGCTTAAGCTCTGGCGTGGTATTTGTCAGGGTCCGCCAGGACCGGATTAAA	0.00153296
na	na	GTTGGCGCCAGGCCGCCGCTTGGCGTAGGCTCTGGCGTGGTACTCGTCACGGTCCGCCGGGGCCGGATTAAA	0.0015022
na	na	ATTGGCGCCAGGCCGCCACCCGGCTTAAGCTCCGACATAGTGTTTGTCAGGGTCCGCCAGGACCGGATTAAA	0.00146561
na	na	GTTGGCGCCAAGCCGCCGCTTGGCGTAGGCTCTGGCGTGGTACTCGTCAGGGTCCGCCGGGGCCGGATTAAA	0.00145631
na	na	ACTGGCGCCAGGCCGCCGCCCGGCTTAAGCCCTGGCGTGGTACCTGTCAGGATCCGCCGAGGCCGGATTAAA	0.00145025
na	na	ATTGGCGCCAGGCCGCCGCCTGGCTTAGGCTCTGGCGTGGTACTCGTCACGGTCCGCCGGGGCCGGATTAAA	0.00144541
na	na	ATTGGCGCCAGGCCGCCACCCGGCTTAAGCTCTGGTGTGGTATTTGTCACGGTCCGCCGGGGCCGGATTAAA	0.00144428
na	na	ATTGGCGCCAGGCCGCCGCCCGGCTTAAGCTCTGGCGTGATATTCGTCTCGGTCCGCCGGGGCCGGATTAAA	0.00144428
na	na	ATTGGCGCCAGGCCGCCGCCCGGCTTAAGCTCTGGTGTGGTACTTGTCTCGGTCTGCCGGGGCCGGATTAAA	0.00144428
na	na	ATTGGCGCCAGGCCGCCGCCCGGCTTAAGCTCTGGCGTGATACTCGTCTCGGTCCGCCGGGGCCGGATTAGA	0.00144428
na	na	ATTGGCGCCAGGCCGCCGCCCGGCTTAAGCTCTGGCGTGGTACTCGTCACGGTCTGCCGGGGCCGGATTAGA	0.00144428
na	na	ATTGGCGCCAGGCCGCCGCCCGGCTTAAGCTCTGGCGTGGTACTTGTCTCGGTCTGCCGGGGCCGGATTGGA	0.00144428
na	na	ATTGGCGCCAGGCCGCCGCCCGGCTTAAGCTCTGGCGTGGTATTTGTCTCGGTCCGCCGGGGCCGGATTGAA	0.00144428
na	na	ATTGGCGCCAGGCCGCCGCCCGGCTTAAGCTCTGGTGTGGTACTTGTCTCGGTCCGCCGGGGCCGGATTAGA	0.00144428
na	na	ATTGGCGCCAGGCCGCCGCCCGGCTTAAGCTCTGGTGTGGTACTCGTCACGGTCCGCCGGGGCCGGATTAGA	0.00144428
na	na	ACTGGCGCCAGGCCGCCACCCGGCTTAAGCTCTGACATGGCACTTCTCAGGGTCCGCCAGGACCGGATTAAA	0.00144352
na	na	ATCGGCGCCAGGGCGCCATCCGGCTTTAGCTCTGACATGGTATTTCTCACGGTCCGCCGAGGCCGGATTAAA	0.00142399
na	na	ATTGGCGCCAGGCCGCCACCCGGCTTTAGCTCTGGCATGGTATTTCTCACGGTCCGCCGGGGCCGGATTAAA	0.00142369
na	na	ATTGGCGCCAGGCCGCCACCCGGCTTTAGCTCTGACATGGTATTTCTCACGGTCCGCCAGGGCCGGATTAAA	0.00142369
na	na	ACTGGCGCCAGGCCGCCACCCGGCTTTAGCTCTGACATGGTATTTGTCACGGTCCGCCAGGGCCGGATTAAA	0.00140105
na	na	ACTGGCGCCAGGCCGCCACCCGGCTTAAGCTCTGGCATGGTATTTGTCAGGGTCCGCCGGGGCCGGATTAAA	0.00140105
na	na	ACTGGCGCCAGGCCGCCACCCGGCTTAAGCTCTGACATAGTATTTGTCACGGTCCGCCGGGGCCGGATTAAA	0.00140105
na	na	ACTGGCGCCAGGCCGCCACCCGGCTTAAGCTCTGACATGGTATTTATCACGGTCCGCCGGGGCCGGATTAAA	0.00140105
na	na	ACTGGCGCCAGGCCGCCACCCGGCTTGAGCTCTGACATGGTATTTGTCACGGTCCGCCAGGGCCGGATTAAA	0.00140105
na	na	ATTGGCGCCAGGCCGCCACCCGGCTTTAGCTCTGACATGGTATTTGTCACGGTCCGCCGGGGCCGGATTAAA	0.00138543
na	na	ATTGGCGCCAGGCCGCCACCCGGCTTAAGCTCTGACATGGTATTTGTCACGGTCCGCCGGGGCCGGGTTAAA	0.00138543
na	na	ATTGGCGCCAGGCCGCCGCCTGGCGTAGGCTCTGGCGTGGTACTTGTCACGGTCCGCCGGGGCCGGATTAAA	0.00133422
na	na	ATTGGCGCCAGGCCGCCGCCTGGCGTAAGCTCTGGCGTGGTACTCGTCACGGTCCGCCGAGGCCGGATTAAA	0.00133422
na	na	ATTGGCGCCAGGCCGCCGCCCGGCTTAAGCTCTGGCGTGGTGCTTGTCACGGTCCGCCGGGGCCGGATTAAA	0.00133319
na	na	ATTGGCGCCAGGCCGCCGCCCGGCTTAAGCTCTGGTGTGGTATTTGTCACGGTCCGCCGGGGCCGGATTGAA	0.00133319
na	na	ATTGGCGCCAGGCCGCCGCCCGGCTTAAGCTCTGGTGTGATACTCGTCTCGGTCCGCCGGGGCCGGATTAGA	0.00133319
na	na	ATTGGCGCCAGGCCGCCGCCCGGCTTAAGCTCTGGTGTGATATTCGTCACGGTCCGCCGGGGCCGGATTAAA	0.00133319
na	na	ATTGGCGCCAGGCCGCCACCCGGCTTAAGCTCTGGCGTGGTACTTGTCTCGGTCCGCCGGGGCCGGATTAAA	0.00133319
na	na	ATTGGCGCCAGGCCGCCGCCCGGCTTAAGCTCTGGCGTGGTACTCGTCACGGTCCGCCGGGGCCGGATTGGA	0.00133319
na	na	ATTGGCGCCAGGCCGCCGCCCGGCTTAAGCTCTGGCGTGATACTCGTCTCGGTCTGCCGGGGCCGGATTAGA	0.00133319
na	na	ATTGGCGCCAGGCCGCCGCCCGGCTTAAGCTCTGGCGTGATACTCGTCACGGTCTGCCGGGGCCGGATTAGA	0.00133319
na	na	ATTGGCGCCAGGCCGCCGCCCGGCTTAAGCTCTGGCGTGATGCTCGTCACGGTCCGCCAGGGCCGGATTAAA	0.00133188
na	na	ATTGGCGCCAGGCCGCCGCCCGGCTTAAGCCCTGGTGTGGTACTCGTCACGGTCCGCCGAGGCCGGATTAAA	0.00133105
na	na	ATTGGCGCCAGGCCGCCGCCCGGCTTAAGCCCTGGTGTGGTACCCGTCACGGTCCGCCGGGGCCGGATTAAA	0.00133105
na	na	ACTGGCGCCAGGCCGCCACCCGGCTTAAGCTCTGGCATGGTACTTGTCACGGTCCGCCAAGGCCGGATTAAA	0.00132567
na	na	ACTGGCGCCAGGCCGCCACCCGGCTTAAGCTCTGACATGGTACTTGTCAGGGTCCGCCAGGACCGGATTAAA	0.00132567
na	na	ACTGGCGCCAGGCCGCCACCCGGCTTAAGCTCTGACATGGTACTTGTCACGGTCCGCCAAGGCCGGATTAAA	0.00132567
na	na	ATTGGCGCCAGGCCGCCACCCGGCTTAAGCTCTGACATGGTACTTGTCAGGGTCCGCCGGGGCCGGATTAAA	0.00132567
na	na	ATTGGCGCCAGGCCGCCACCCGGCTTAAGCTCTGACATGGTACTTGTCACGGTCCGCCGGGGCCGGGTTAAA	0.00132567
na	na	ACTGGCGCCAGGCCGCCACCCGGCTTAAGCTCTGACATGGTACCTGTCACGGTCCGCCGGGGCCGGGTTAAA	0.00132567
na	na	ACTGGCGCCAGGCCGCCACCCGGCTTAAGCTCTGACATGGCACTTGTCACGATCCGCCGGGGCCGGATTAAA	0.00132567
na	na	ACCGGCGCCAGGGCGCCATCCGGCTTTAGCTCTGGTATGGTATTTCTCACGGTCCGCCGGGGCCGGATTAAA	0.00130533
na	na	ACCGGCGCCAGGGCGCCATCCGGCTTTAGCTCTGACATGGTATTTCTCACGGTCCGCCGGGACCGGATTAAA	0.00130533
na	na	ACCGGCGCCAGGCCGCCATCCGGCTTTAGCTCTGACATGGTATTTCTCAGGGTCCGCCGGGGCCGGATTAAA	0.00130533
na	na	ACCGGCGCCAGGGCGCCATCCGGCTTTAGCTCTGACATGGTATTTCTCAGGGTCCGCCAGGGCCGGATTAAA	0.00130533
na	na	ATTGGCACCAGGCCGCCGCCCTGCTTAAGCCCTGGCGTGGTACTCGTCACGATCCGCCGAGGCCGGATTAAA	0.00128
na	na	ATTGGCGCCAGGCCGCCGCCCGGCTTAAGCTCTGGCATGGTATTCGTCACGGTCCGCCGGGGCCGGATTAAA	0.00125117
na	na	ATTGGCGCCAGGCCGCCGCCCGGCTTAAGCTCTGGCGTGGTACTCGTCACGGTCCGCCGGGACCGGATTAAA	0.00125117
na	na	ATTGGCGCCAGGCCGCCACCCGGCTTAAGCTCCGACATAGTGTTTGTCACCGTCCGCCGGGGCCGGATTAAA	0.00124014
na	na	ATTGGCGCCAGGCCGCCACCCGGCTTAAGCTCCGACATAGTGTTTGTCAGGGTCCGCCGGGACCGGATTAAA	0.00124014
na	na	ACTGGCGCCAGGCCGCCGCCCGGCTTAAGCCCTGGTGTGGTACCTGTCACGGTCCGCCGGGGCCGGATTAAA	0.00122713
na	na	ATTGGCGCCAGGCCGCCACCCGGCTTAAGCTCCGACATAGTGTTTGTCACCGTCCGCCGGGGCCGGATTAAG	0.00122454
na	na	ATTGGCGCCAGGCCGCCGCCCGGCTTAAGCTCTGGCATGGTACTCGTCACGGTCCGCCGGGGCCGGATTAAA	0.00122209
na	na	ATTGGCGCCAGGCCGCCGCCCGGCTTAAGCTCTGGCGTGGTACTTGTCACGGTCTGCCGGGGCCGGATTGGA	0.00122209
na	na	ATTGGCGCCAGGCCGCCGCCCGGCTTAAGCTCTGGTGTGATACTCGTCACGGTCCGCCGGGGCCGGATTGAA	0.00122209
na	na	ATTGGCGCCAGGCCGCCGCCCGGCTTAAGCTCTGGTGTGATACTCGTCACGGTCCGCCGGGGCCGGATTAGA	0.00122209
na	na	ATTGGCGCCAGGCCGCCGCCCGGCTTAAGCTCTGGCGTGATATTCGTCACGGTCCGCCGGGGCCGGATTAGA	0.00122209
na	na	ATTGGCGCCAGGCCGCCGCCCGGCTTAAGCTCTGGTGTGATACTCGTCACGGTCTGCCGGGGCCGGATTGGA	0.00122209
na	na	ATTGGCGCCAGGCCGCCGCCCGGCTTAAGCTCTGGCGTGGTATTTGTCTCGGTCCGCCGGGGCCGGATTAGA	0.00122209
na	na	ATTGGCGCCAGGCCGCCGCCCGGCTTAAGCTCTGGTGTGATATTTGTCACGGTCCGCCGGGGCCGGATTAGA	0.00122209
na	na	ATTGGCGCCAGGCCGCCGCCCGGCTTAAGCTCTGGCGTGATATTTGTCACGGTCCGCCGGGGCCGGATTGGA	0.00122209
na	na	ACTGGCGCCAGGCCGCCACCCGGCTTTAGCTCTGACATGGCATTTCTCAGGATCCGCCGGGACCGGATTAAA	0.00118718
na	na	ACTGGCGCCAGGCCGCCACCCGGCTTTAGCTCTGACATGGCATTTCTCAGGATCCGCCAGGGCCGGATTAAA	0.00118718
na	na	ATTGGCGCCAGGGCGCCATCCGGCTTTAGCTCTGACATGGTATTTCTCAGGGTCCGCCGGGGCCGGATTAAA	0.00118666
na	na	ATTGGCGCCAAGCCGCCGCTTGGAGTAAGCTCTGGCGTGGTACTCGTCACGATCCGCCGAGGCCGGATTAAA	0.00114639
na	na	ACTGGCGCCAGGCCGCCACCCGGCTTAAGCTCTGACATGGCATTTCTCACGGTCCGCCAGGGCCGGATTAAA	0.00113895
na	na	ACTGGCGCCAGGCCGCCATCCGGCTTTAGCTCTGACATGGTATTTCTCACGGTCCGCCAGGGCCGGATTAAA	0.00113895
na	na	ACTGGCGCCAGGCCGCCACCCGGCTTTAGCTCTGACATGGTATTTCTCAGGGTCCGCCGAGGCCGGATTAAA	0.00113895
na	na	ACTGGCGCCAGGCCGCCACCCGGCTTTAGCTCTGACATGGTATTTCTCACGATCCGCCGGGGCCGGATTAAA	0.00113895
na	na	ACTGGCGCCAGGCCGCCACCCGGCTTAAGCTCTGACATGGTATTTCTCAGGGTCCGCCGGGGCCGGATTAAA	0.00113895
na	na	ACTGGCGCCAGGCCGCCACCCGGCTTAAGCTCTGACATGGCATTTCTCAGGGTCCGCCGGGACCGGATTAAA	0.00113895
na	na	ACTGGCGCCAGGCCGCCACCCGGCTTTAGCTCTGACATGGTATTTCTCACGGTCCGCCAGGACCGGATTAAA	0.00113895
na	na	ATTGGCGCCAGGCCGCCACCCGGCTTAAGCTCCGACATAGTGTTTGTCTCGGTCCGCCGGGGCCGGATTAAA	0.0011274
na	na	ATTGGCGCCAGGCCGCCACCCGGCTTAAGCTCTGACATGGTATTTGTCACGGTCCGCCGGGACCGGATTAAA	0.0011257
na	na	ATTGGCGCCAGGCCGCCGCCTGGCGTAGGCTCTGGCGTGGTACTCGTCACGGTCCGCCAGGGCCGGATTAAA	0.00111185
na	na	GTTGGCGCCAAGCCGCCGCTTGGCGTAGGCTCTGGCGTGGTACTCGTCTCCGTCCGCCAGGGCCGGATTAAA	0.00111099
na	na	ATTGGCGCCAGGCCGCCACCCGGCTTAAGCTCTGGCGTGATACTTGTCACGGTCCGCCGGGGCCGGATTAAA	0.00111099
na	na	ATTGGCGCCAGGCCGCCGCCCGGCTTAAGCTCTGGCGTGGTACTTGTCACGGTCCGCCGGGACCGGATTAAA	0.00111099
na	na	ATTGGCGCCAGGCCGCCGCCCGGCTTAAGCTCTGGCGTGGTACTTGTCTCGGTCTGCCGGGGCCGGATTAGA	0.00111099
na	na	ATTGGCGCCAGGCCGCCGCCCGGCTTAAGCTCTGGTGTGATACTCGTCTCGGTCCGCCGGGGCCGGATTAAA	0.00111099
na	na	ATTGGCGCCAGGCCGCCGCCCGGCTTAAGCTCTGGTGTGATACTCGTCTCGGTCTGCCGGGGCCGGATTGAA	0.00111099
na	na	ATTGGCGCCAGGCCGCCGCCCGGCTTAAGCTCTGGCGTGGTACTCGTCGCGGTCCGCCGGGGCCGGATTAAA	0.00111099
na	na	ATTGGCGCCAGGCCGCCGCCCGGCTTAAGCTCTGGTGTGATACTCGTCACGGTCTGCCGGGGCCGGATTAGA	0.00111099
na	na	ATTGGCGCCAGGCCGCCGCCCGGCTTAAGCTCTGGTGTGGTACTCGTCACGGTCCGCCGGGGCCGGATTGGA	0.00111099
na	na	ATTGGCGCCAGGCCGCCGCCCGGCTTAAGCTCTGGCGTGGTATTTGTCTCGGTCTGCCGGGGCCGGATTAAA	0.00111099
na	na	ATTGGCGCCAGGCCGCCGCCCGGCTTAAGCTCTGGCGTGGTACTTGTCGCGGTCCGCCGGGGCCGGATTAGA	0.00111099
na	na	ATTGGCGCCAGGCCGCCACCCGGCTTAAGCTCTGACATAGTATTTGTCACGGTCCGCCAGGGCCGGATTAAA	0.00110834
na	na	ATTGGCGCCAGGCCGCCACCCGGCTTAAGCTCTGACATGGTGTTTGTCACGGTCCGCCAGGGCCGGATTAAA	0.00110834
na	na	ATTGGCGCCAGGCCGCCGCCCGGCTTAAGCTCTGGCGTGATGTTCGTCACGGTCCACCGGGGCCGGATTAAA	0.00108972
na	na	ATTGGCGCCAGGCCGCCGCCCGGCTTAAGCTCTGGCGTGATGTTCGTCACGGTTCGCCAGGACCGGATTAAA	0.00108972
na	na	ATTGGCGCCAGGCCGCCGCCCGGCTTAAGCTCTGGCGTGATGCTCGTCACGGTCTGCCGGGGCCGGATTAAA	0.00108972
na	na	ATTGGCGCCAGGCCGCCGCCCGGCTTAAGCTCTGGCGTGATGTTCGTCACGGTCTGCCAGGACCGGATTAAA	0.00108972
na	na	ATTGGCGTCAGGCCGCCACCCGGCTTAAGCTCCGACATAGTGTTTGTCAGGGTCCGCCGGGGCCGGATTAAA	0.00108319
na	na	ATTGGCGCCAGGCCGCCACCCGGCTTTAGCTCTGACATGGCATTTCTCAGGGTCCGCCGGGGCCGGATTAAA	0.00108264
na	na	ACTGGCGCCAGGCCGCCGCCCGGCTTAAGCCCTGGCGTGGTACTCGTCACGGTCCGCCGGGGCCGGATTAAA	0.00106866
na	na	ACCGGCGCCAGGGCGCCATCCGGCTTTAGCTCTGATATGGTATTTCTCAGGGTCCGCCGAGGCCGGATTAAA	0.001068
na	na	ACCGGCGCCAGGACGCCATCCGGCTTTAGCTCTGACATGGTATTTCTCACGGTCCGCCGGGGCCGGATTAAA	0.001068
na	na	ACTGGCGCCAGGCCGCCACCCGGCTTAAGCTCTGGCATGGCATTTGTCACGGTCCGCCGGGGCCGGATTAAA	0.00105079
na	na	ACTGGCGCCAGGCCGCCACCCGGCTTAAGCTCTGACATGGTATTTGTCAGGGTCCGCCAGGACCGGATTAAA	0.00105079
na	na	ATTGGCACCAGGCCGCCGCCCTGCTTAAGCCCTGGCGTGGTACTCGTCACGATCCGCCGGGGCCGGATTAAA	0.00104194
na	na	ATTGGCACCAGGCCGCCGCCCGGCTTAAGCCCTGGCGTGGTACTCGTCACGGTCCGCCAGGGCCGGATTAAA	0.00104058
na	na	GTTGGCGCCAAGCCGCCGCTTGGCGTAGGCTCTGGCGTGGTACTCGTCACCGTCCGCCGGGGCCGGATTAAA	0.00102907
na	na	GTTGGCGCCAAGCCGCCGCTTGGCGTAGGCTCTGGCGCGGTACTCGTCTCCGTCCGACAGGGCCGGATTAAG	0.00102203
na	na	ATTGGCGCCAGGCCGCCACCCGGCTTAAGCTCTGGCGTGGTATTTGTCACGGTCCGCCAGAGCCGGATTAAA	0.00102197
na	na	ATTGGCGCCAGGCCGCCACCCGGCTTAAGCTCTGGCGTGGTATTTGTCACGGTCCGCCAGGGCCGGATCAAA	0.00102197
na	na	ATTGGCGCCAGGCCGCCACCCGGCTTAAGCTCTGGCGTGGTACTTGTCATGGTCCGCCGGGGCCGGATTAAA	0.00102197
na	na	ATTGGCGCCAGGCCGCCACCCGGCTTAAGCTCTGGCGTGGTATTTGTCACGATCCGCCGGGGCCGGATTAAA	0.00102197
na	na	ATTGGCGCCAGGCCGCCACCCGGCTTAAGCTCTGGCGTGGTATTTGTCATGGTCCGCCGGGGCCGGATTAAA	0.00102197
na	na	ATTGGCGCCAGGCCGCCACCCGGCTTAAGCTCTGACGTGGTATTTGTCACGGTCCGCCGGGACCGGATTAAA	0.00102197
na	na	ATTGGCGCCAGGCTGCCACCCGGCTTAAGCTCTGGCGTGGTACTTGTCACGGTCCGCCGGGGCCGGATTAAA	0.00102197
na	na	ATTGGCGCCAGGCCGCCACCCGGCTTAAGCTCTGGCGTGGTATTTGTCACGGTCCGCCGGAACCGGATTAAA	0.00102197
na	na	ATTGGCGCCAGGCCGCCACCCGGCTTAAGCTCTGGCGTGGTATTTGTCACGGTCCGCCAGGGCCGGGTTAAA	0.00102197
na	na	ATTGGCGCCAGGCCGCCACCCGGCTTAAGCTCTGGCGTGGTATTTGTCACGGTCCGCCGAGGCCGGATTAAA	0.00102197
na	na	ATTGGCGCCAGGCCGCCACCCGGCTTAAGCTCTGGCGTGGTATTTGTCACAGTCCGCCGGGGCCGGATTAAA	0.00102197
na	na	ATTGGCGCCAGGCCGCCACCCGGCTTAAGCTCTGGCGTGGTGTTTGTCAGGGTCCGCCAGGACCGGATTAAA	0.00102197
na	na	ATTGGCGCCAGGCCGCCACCCGGCTTAAGCTCCGACATGGTGTTTGTCACGGTCCGCCGGGGCCGGATTAAG	0.00101466
na	na	ATTGGCGCCAGGCCGCCACCCGGCTGAAGCTCCGACATGGTGTTTGTCTGCGTCCGCCGGGGCCGGATTAAG	0.00100189
na	na	ATTGGCGCCAGGCCGCCACCCGGCTTAAGCTCTGGTGTGGTACTTGTCACGGTCCGCCGGGGCCGGATTAAA	0.000999889
na	na	ATTGGCGCCAGGCCGCCGCCCGGCTTAAGCTCTGGTGTGGTATTCGTCACGGTCCGCCGGGGCCGGATTAAA	0.000999889
na	na	ATTGGCGCCAGGCCGCCGCCTGGCTTAAGCTCTGGCGTGGTACTTGTCACGGTCCGCCGGGGCCGGATTAAA	0.000999889
na	na	ATTGGCGCCAGGCCGCCGCCCGGCTTAAGCTCTGGCGTGATATTTGTCACGGTCCGCCAGGGCCGGATTAAA	0.000999889
na	na	ATTGGCGCCAGGCCGCCGCCCGGCTTAAGCTCTGGCGTGGTACTCGTCTCGGTCCGCCGGGGCCGGATTGAA	0.000999889
na	na	ATTGGCGCCAGGCCGCCGCCCGGCTTAAGCTCTGGCGTGGTACTCGTCTCGGTCTGCCGGGGCCGGATTAAA	0.000999889
na	na	ATTGGCGCCAGGCCGCCACCCGGCTTAAGCTCTGGCGTGGTACTTGTCACGGTCTGCCGGGGCCGGATTAAA	0.000999889
na	na	ATTGGCGCCAGGCCGCCGCCCGGCTTAAGCTCTGGCGTGGTATTCGTCTCGGTCCGCCGGGGCCGGATTAAA	0.000999889
na	na	ATTGGCGCCAGGCCGCCGCCCGGCTTAAGCTCTGGTGTGATATTTGTCACGGTCTGCCGGGGCCGGATTAGA	0.000999889
na	na	ATTGGCGCCAGGCCGCCGCCCGGCTTAAGCTCTGGCGTGGTATTCGTCACGGTCCGCCGGGGCCGGATTGAA	0.000999889
na	na	ATTGGCGCCAGGCCGCCGCCCGGCTTAAGCTCTGGCGTGATATTTGTCACGGTCTGCCGGGGCCGGATTGGA	0.000999889
na	na	ATTGGCGCCAGGCCGCCGCCCGGCTTAAGCTCTGGCGTGATATTCGTCACGGTCCGCCAGGACCGGATTAAA	0.00096864
na	na	ATTGGCGCCAGGCCGCCGCCCGGCTTAAGCTCTGGCGTGGTGTTCGTCACGGTCCGCCAGGGCCGGATTAAA	0.00096864
na	na	ATTGGCGCCAGGCCGCCGCCCGGCTTAAGCTCTGGCGTGATGTTTGTCACGGTCTGCCGGGGCCGGATTAAA	0.00096864
na	na	ATTGGCGCCAGGCCGCCGCCCGGCTTAAGCCCTGGCGTGGTACTCGTCAGGATCCGCCGGGGCCGGATTAAA	0.00096
na	na	ATTGGCACCAGGCCGCCGCCCTGCTTAAGCCCTGGCGTGGTACTCGTCACGGTCCGCCGGGGCCGGATTAGA	0.000954198
na	na	ATTGGCGCCAGGCCGCCGCCCGGCTTAAGCCCTGGTGTGGTACTCGTCACGATCCGCCGGGGCCGGATTAAA	0.000950751
na	na	ACCGGCGCCAGGGCGCCATCCGGCTTTAGCTCTGACATGGTATTTCTCAAGGTCCGCCGGGGCCGGATTAAA	0.00094933
na	na	ACTGGCGCCAGGGCGCCATCCGGCTTTAGCTCTGACATGGCATTTCTCACGGTCCGCCGGGGCCGGATTAAA	0.00094933
na	na	ATCGGCGCCAGGGCGCCATCCGGCTTTAGCTCTGATATGGTATTTCTCAGGGTCCGCCGGGGCCGGATTAAA	0.00094933
na	na	ATCGGCGCCAGGGCGCCATCCGGCTTTAGCTCTGGCATGGTATTTCTCAGGGTCCGCCGGGGCCGGATTAAA	0.00094933
na	na	ATTGGCGCCAGGCCGCCGCCCGGCTTAAGCTCTGACGTGGTATTCGTCACGGTCCGCCGGGGCCGGATTAAA	0.00093838
na	na	ATTGGCGCCAGGCCGCCGCCCGGCTTAAGCCCTGGCGTGGTACTCGTCACGGTCCGCCAGGGCCGGATTAAA	0.000935079
na	na	ATTGGCGCCAGGCCGCTGCCTGGCGTAGGCTCTGGCGTGGTACTCGTCACGGTCCGCCGGGGCCGGATTAAA	0.000928721
na	na	ATTGGCGCCAGGCCGCCGCCCGGCTTAAGCTCTGGCGTGGTACTCGTCACGGTCCGCCGAGGCCGGATTAAA	0.000927429
na	na	ATTGGCGCCAAGCCGCCGCTTGGCGTAGGCTCTGGCGTGGTACTCGTCACGGTCCGCCAGGGCCGGATTAAA	0.000924428
na	na	GTTGGCGCCAAGCCGCCGCTTGACGTAAGCTCTGGCGTGGTACTCGTCACGGTCCGCCGAGGCCGGATTAAA	0.000917116
na	na	GTTGGCGCCAAGCCGCCGCTTGACGTAAGCTCTGGCGTGGTACTCGTCACGATCCGCCGGGGCCGGATTAAA	0.000917116
na	na	ACTGGCGCCAGGCCGCCACCCGGCTTAAGCTCCGACATAGTGTTTGTCACGGTCCGCCGGGGCCGGATTAAA	0.000901917
na	na	ATTGGCGCCAAGCCGCCGCCTGGCGTAAGCTCTGGCGTGGTACTCGTCACGATCCGCCGGGGCCGGATTAAA	0.000889482
na	na	ATTGGCGCCAGGCCGCCGCCTGGCGTAGGCTCTGGCGTGGTACTCGTCACGGTCCGCCGAGGCCGGATTAAA	0.000889482
na	na	ATTGGCGCCAGGCCGCCACCCGGCTTAAGCTCTGGCGTGGTACTTGTCACGGTCCGCCAGGGCCGGATTAAA	0.00088879
na	na	ACTGGCGCCAGGCCGCCGCCCGGCTTAAGCTCTGGCGTGGTACTTGTCACGGTCCGCCGGGGCCGGATTAAA	0.00088879
na	na	ATTGGCACCAGGCCGCCGCCCGGCTTAAGCTCTGGCGTGGTACTTGTCACGGTCCGCCGGGGCCGGATTAAA	0.00088879
na	na	ATTGGCGCCAGGCCGCCGCCCGGCTTAAGCTCTGGCGTGGTACTCGTCACGGTCTGCCGGGGCCGGATTGAA	0.00088879
na	na	ATTGGCGCCAGGCCGCCGCCCGGCTTAAGCTCTGGCGTGATACTCGTCTCGGTCTGCCGGGGCCGGATTGAA	0.00088879
na	na	ATTGGCGCCAGGCCGCCGCCCGGCTTAAGCTCTGGCGTGATATTTGTCACGGTCTGCCGGGGCCGGATTAGA	0.00088879
na	na	ATTGGCGCCAGGCCGCCGCCCGGCTTAAGCTCTGGCGTGATATTTGTCTCGGTCTGCCGGGGCCGGATTAAA	0.00088879
na	na	ATTGGCGCCAGGCCGCCGCCCGGCTTAAGCTCTGGCGTGGTATTTGTCACGGTCTGCCGGGGCCGGATTAGA	0.00088879
na	na	ATTGGCGCCAGGCCGCCGCCCGGCTTAAGCTCTGGCGTGATATTTGTCTCGGTCCGCCGGGGCCGGATTAGA	0.00088879
na	na	ATTGGCGCCAGGCCGCCGCCCGGCTTAAGCTCTGGCGTGATACTTGTCGCGGTCCGCCGGGGCCGGATTAAA	0.00088879
na	na	ATTGGCGCCAGGCCGCCGCCCGGCTTAAGCTCTGGTGTGATACTCGTCTCGGTCCGCCGGGGCCGGATTGGA	0.00088879
na	na	ATTGGCGCCAGGCCGCCGCCCGGCTTAAGCTCTGGTGTGATACTCGTCTCGGTCCGCCGGGGCCGGATTGAA	0.00088879
na	na	ATTGGCGCCAGGCCGCCGCCCGGCTTAAGCTCTGGTGTGGTATTTGTCACGGTCCGCCGGGGCCGGATTAGA	0.00088879
na	na	ATTGGCGCCAGGCCGCCGCCCGGCTTAAGCTCTGGCGTGATATTTGTCTCGGTCCGCCGGGGCCGGATTGAA	0.00088879
na	na	ATTGGCGCCAGGCCGCCGCCCGGCTTAAGCTCTGGCGTGATACTCGTCACGGTCCGCCGGGGCCGGATTGGA	0.00088879
na	na	ATTGGCGCCAGGCCGCCGCCCGGCTTAAGCTCTGGTGTGGTACTCGTCTCGGTCTGCCGGGGCCGGATTAAA	0.00088879
na	na	ACTGGCGCCAGGCCGCCACCCGGCTTGAGCTCTGACATGGCATTTCTCAGGGTCCGCCAGGACCGGATTAAA	0.000884799
na	na	ATTGGCGCCAGGCCGCCACCCGGCTTAAGCTCTGGCATGGTACTTGTCACGGTCCGCCGAGGCCGGATTAAA	0.000883783
na	na	ACTGGCGCCAGGCCGCCACCCGGCTTAAGCTCTGGCATGGCACTTGTCACGGTCCGCCGAGGCCGGATTAAA	0.000883783
na	na	ATTGGCGCCAGGCCGCCACCCGGCTTAAGCTCTGACATGGTACTTGTCAGGATCCGCCGGGGCCGGATTAAA	0.000883783
na	na	ACTGGCGCCAGGCCGCCACCCGGCTTAAGCTCTGACATGGTACTTGTCACGATCCGCCGGGGCCGGGTTAAA	0.000883783
na	na	ACTGGCGCCAGGCCGCCACCCGGCTTAAGCTCTGACATGGCACTTGTCAGGGTCCGCCAGGGCCGGATTAAA	0.000883783
na	na	ACTGGCGCCAGGCCGCCACCCGGCTTAAGCTCTGACATGGCATTTGTCACGGTCCGCCAAGGCCGGATTAAA	0.000883783
na	na	ACTGGCGCCAGGCCGCCACCCGGCTTAAGCTCTGACATGGCACCTGTCACGGTCCGCCGGGGCCGGATTAAA	0.000883783
na	na	ACTGGCGCCAGGCCGCCACCCGGCTTAAGCTCTGGCATGGTACTTGTCACGATCCGCCAGGGCCGGATTAAA	0.000883783
na	na	ACTGGCGCCAGGCCGCCACCCGGCTTAAGCTCTGGCATGGCACTTGTCACGATCCGCCGGGGCCGGATTAAA	0.000883783
na	na	ACTGGCACCAGGCCGCCACCCGGCTTAAGCTCTGACATGGTACTTGTCACGGTCCGCCAGGGCCGGATTAAA	0.000883783
na	na	ATTGGCGCCAGGCCGCCACCCGGCTTAAGCTCTGGCATGGTACTTGTCACGGTCCGCCAGGGCCGGATTAAA	0.000883783
na	na	ACTGGCGCCAGGCCGCCACCCGGCTTAAGCTCTGGCATGGTACCTGTCACGGTCCGCCAGGGCCGGATTAAA	0.000883783
na	na	ACTGGCGCCAGGCCGCCACCCGGCTTAAGCTCTGACATGGCATTTGTCACGATCCGCCGGGGCCGGATTAAA	0.000883783
na	na	ATTGGCGCCAGGCCGCCACCCGGCTTAAGCTCTGGCATGGTACTTGTCAGGGTCCGCCGGGGCCGGATTAAA	0.000883783
na	na	ACTGGCGCCAGGCCGCCACCCGGCTTAAGCTCTGACATGGTACTTGTCATGGTCCGCCGGGGCCGGATTAAA	0.000883783
na	na	ATTGGCGCCAGGCCGCCACCCGGCTTAAGCTCCGACATAGTGTTTGTCATGGTCCGCCGGGGCCGGATTAAA	0.000866551
na	na	ATTGGCGCCAGGCCGCCACCCGGCTTTAGCTCTGGCATGGTATTTCTCAGGGTCCGCCAGGACCGGATTAAA	0.000854214
na	na	ATTGGCGCCAGGCCGCCGCCCGGCTTAAGCTCTGGCGTGATGTTTGTCACGGTCCGCCGGGACCGGATTAAA	0.00084756
na	na	ATTGGCGCCAGGCCGCCGCCCGGCTTAAGCTCTGGCGTGGTGTTCGTCACGGTCTGCCGGGGCCGGATTAAA	0.00084756
na	na	ATTGGCGCCAGGCCGCCGCCCGGCTTAAGCCCTGGCGTGGTACTCGTCAGGGTCCGCCGGGGCCGGATTAAA	0.000832466
na	na	ATTGGCGCCAGGCCGCCACCCGGCTTAAGCTCTGACATAGTATTTGTCAGGGTCCGCCGGGGCCGGATTAAA	0.000831255
na	na	ATTGGCGCCAGGCCGCCACCCGGCTTAAGCTCTGACATGGTATTTGTCAGGGTCCGCCAGGACCGGATTAAA	0.000831255
na	na	ATTGGCGCCAGGCCGCCACCCGGCTTAAGCTCTGACATGGTATTTGTCACGATCCGCCGGGGCCGGATTAAA	0.000831255
na	na	ACCGGCGCCAGGGCGCCATCCGGCTTTAGCTCTGACATGGTATTTCTCAGGATCCGCCGAGGCCGGATTAAA	0.000830663
na	na	ACCGGCGCCAGGGCGCCATCCGGCTTTAGCTCTGATATGGTATTTCTCACGGTCCGCCGGGGCCGAATTAAA	0.000830663
na	na	ACTGGCGCCAGGGCGCCACCCGGCTTTAGCTCTGACATGGTATTTCTCAGGGTCCGCCGGGGCCGGATTAAA	0.000830663
na	na	ATTGGCGCCAGGCCGCCGCCTGGCGTAGGCTCTGGCGTGGCACTCGTCACGGTCCGCCAGGGCCGGATTAAA	0.000812631
na	na	GTTGGCGCCAAGCCGCCGCTTGGCGTAAGCTCTGGCGTGGTACTCGTCATGATCCGCCGAGGCCGGATTAAA	0.000802476
na	na	ACTGGCGCCAGGCCGCCACCCGGCTTTAGCTCTGACATGGCATTTCTCAAGGTCCGCCGGGGCCGGATTAAA	0.000791452
na	na	ACTGGCGCCAGGCCGCCACCCGGCTTTAGCTCTGACATGGCATTTCTCAGGATCCGCCAAGACCGGATTAAA	0.000791452
na	na	ATTGGCGCCAGGCCGCCACCCGGCTTAAGCTCCGACGTAGTGTTTGTCACGGTCCGCCGGGGCCGGATTAAA	0.000789177
na	na	ATTGGCACCAGGCCGCCGCCCTGCTTTAGCCCTGGCGTGGTACTCGTCAGGATCCGCCGAGGCCGGATTAAA	0.000782932
na	na	ACTGGCGCCAGGCCGCCGCCCGGCTTAAGCCCTGGTGTGGTACTTGTCAGGGTCCGCCGAGGCCGGATTAAA	0.000780901
na	na	ATTGGCGCCAGGCCGCCACCCGGCTTAAGCTCCGACATAGTGTTTGTCTCCGTCCGCCAGGGCCGGATTAAG	0.00077925
na	na	ATTGGCGCCAGGCCGCCGCCTGGCGTAGGCTCTGGCGTGATACTCGTCACGGTCCGCCGGGGCCGGATTAAA	0.000778297
na	na	ATTGGCGCCAGGCCGCCGCCTGGCGTAAGCTCTGGCGTGGTATTCGTCACGGTCCGCCGGGGCCGGATTAAA	0.000778297
na	na	GTTGGCGCCAAGCCGCCGCTTGGCGTAGGCTCTGGCGTGGTACTCGTCACCGTCCGCCGGGGCCGGATTAAG	0.000777691
na	na	ATTGGCGCCAGGCCGCCGCCCGGCTTAAGCTCTGACATGGTATTTGTCACGGTCCGCCGGGGCCGGATTAAA	0.000777691
na	na	ATTGGCGCCAGGCCGCCGCCCGGCTTAAGCTCTGGCGTGATACTTGTCCCGGTCTGCCGGGGCCGGATTGGA	0.000777691
na	na	ATTGGCGCCAGGCCGCCGCCCGGCTTAAGCTCTGGCGTGGTATTTGTCACGGTCCGCCGGGGCCGGATTGGA	0.000777691
na	na	ATTGGCGCCAGGCCGCCGCCCGGCTTAAGCTCTGGTGTGATATTTGTCTCGGTCCGCCGGGGCCGGATTGGA	0.000777691
na	na	ATTGGCGCCAGGCCGCCGCCCGGCTTAAGCTCTGGTGTGGTACTCGTCACGGTCTGCCGGGGCCGGATTGAA	0.000777691
na	na	ATTGGCGCCAGGCCGCCGCCCGGCTTAAGCTCTGGCGTGGTATTCGTCACGGTCCGCCGGGGCCGGATTAGA	0.000777691
na	na	ATTGGCGCCAGGCCGCCGCCCGGCTTAAGCTCTGGTGTGATATTTGTCTCGGTCTGCCGGGGCCGGATTGAA	0.000777691
na	na	ATTGGCGCCAGGCCGCCGCCCGGCTTAAGCTCTGGTGTGATACTCGTCTCGGTCTGCCGGGGCCGGATTAGA	0.000777691
na	na	ATTGGCGCCAGGCCGCCGCCCGGCTTAAGCTCTGGCGTGGTACTCGTCTCGGTCTGCCGGGGCCGGATTGAA	0.000777691
na	na	ATTGGCGCCAGGCCGCCGCCCGGCTTAAGCTCTGGTGTGGTATTTGTCTCGGTCTGCCGGGGCCGGATTAAA	0.000777691
na	na	ATTGGCGCCAGGCCGCCGCCCGGCTTAAGCTCTGGCGTGATACTCGTCACGGTCTGCCGGGGCCGGATTGGA	0.000777691
na	na	ATTGGCGCCAGGCCGCCGCCCGGCTTAAGCTCTGGTGTGGTACTCGTCTCGGTCCGCCGGGGCCGGATTAAA	0.000777691
na	na	ATTGGCGCCAGGCCGCCGCCCGGCTTAAGCTCTGGCGTGATACTCGTCTCGGTCCGCCGGGGCCGGATTGAA	0.000777691
na	na	ATTGGCGCCAGGCCGCCGCCCGGCTTAAGCTCTGGTGTGGTACTCGTCTCGGTCCGCCGGGGCCGGATTAGA	0.000777691
na	na	GTTGGCGCCAAGCCGCCGCTTGGCGTAGGCTCTGGCGTGGTACTCGTCTCGGTCCGCCGGGGCCGGATTAAA	0.000771803
na	na	GTTGGCGCCAAGCCGCCGCTTGGCGTAGGCTCTGGCGTGGTACTCGTCACAGTCCGCCGGGGCCGGATTAAA	0.000771803
na	na	ATTGGCGCCAGGCCGCCACCCGGCTTAAGCTCTGGCGTAGTATTTGTCACGGTCCGCCGGGGCCGGATTAAA	0.000750469
na	na	ATTGGCGCCAGGCCGCCACCCGGCTTAAGCTCTGACGTGGTGTTTGTCACGGTCCGCCAGGGCCGGATTAAA	0.000750469
na	na	GTTGGCGCCAAGCCGCCGCTTGGCGTAGGCTCTGGCGTGGTACTCGTCACGGTCCGCCAGGACCGGATTAAA	0.000728155
na	na	ATTGGCGCCAGGCCGCCGCCCGGCTTAAGCTCTGACGTGATGTTCGTCACGGTCCGCCGGGGCCGGATTAAA	0.00072648
na	na	ATTGGCGCCAGGCCGCCGCCCGGCTTAAGCTCTGGCGTGATGTTCGTCAGGGTCTGCCGGGGCCGGATTAAA	0.00072648
na	na	ATTGGCGCCAGGCCGCCGCCCGGCTTAAGCTCTGGCGTGATGTTCGTCAGGGTTCGCCGGGGCCGGATTAAA	0.00072648
na	na	ATTGGCGCCAGGCCGCCGCCCGGCTTAAGCTCTGGCGTGGTGTTCGTCACGGTCCGCCAGGACCGGATTAAA	0.00072648
na	na	ATTGGCGCCAGGCCGCCGCCCGGCTTAAGCTCTGGCGTGATATTCGTCACGGTTCGCCGGGGCCGGATTAAA	0.00072648
na	na	ACTGGCGCCAGGCCGCCACCCGGCTTTAGCTCTGACATGGCATTTCTCACGGTCCGCCAAGGCCGGATTAAA	0.000721761
na	na	ACTGGCGCCAGGCCGCCACCCGGCTTAAGCTCTGACATGGCATTTCTCACGGTCCGCCGGGACCGGATTAAA	0.000721761
na	na	ACCGGCGCCAGGGCGCCATCCGGCTTTAGCTCTGACATGGTATTTCTCACGGTCCGCGGGGGCCGGATTAAA	0.000711997
na	na	ATCGGCGCCAGGGCGCCATCCGGCTTTAGCTCTGACATGGTATTTCTCACGGTCCGCCGGGGCCGAATTAAA	0.000711997
na	na	ACCGGCGCCAGGACGCCATCCGGCTTTAGCTCTGATATGGTATTTCTCACGGTCCGCCGGGGCCGGATTAAA	0.000711997
na	na	ATCGGCGCCAGGGCGCCACCCGGCTTTAGCTCTGACATGGTATTTCTCAGGGTCCGCCGGGGCCGGATTAAA	0.000711997
na	na	ATCGGCGCCAGGGCGCCATCCGGCTTTAGCTCTGACATGGTATTTCTCACGATCCGCCGGGGCCGGATTAAA	0.000711997
na	na	ACCGGCGCCAGGGCGCCATCCGGCTTTAGCTCTGATATGGTATTTCTCAGGATCCGCCGGGGCCGGATTAAA	0.000711997
na	na	ACCGGCGCCAGGGCGCCATCCGGCTTTAGCTCTGATATGGTATCTCTCACGGTCCGCCGGGGCCGGATTAAA	0.000711997
na	na	ACTGGCGCCAGGCCGCCACCCGGCTTAAGCTCTGACATGGCATTTGTCAGGGTCCGCCAGGGCCGGATTAAA	0.000700525
na	na	ACTGGCGCCAGGCCGCCACCCGGCTTAAGCTCTGACATGGCATTTGTCACGGTCCGCCGAGGCCGGATTAAA	0.000700525
na	na	ACTGGCGCCAGGCCGCCACCCGGCTTAAGCTCTGACATGGCATTTGTCACGGTCCGCCGGGGCCGGGTTAAA	0.000700525
na	na	ACTGGCGCCAGGCCGCCACCCGGCTTAAGCTCTGACATGGTATTTGTCACGGTCCGCCAAGGCCGGATTAAA	0.000700525
na	na	ACTGGCGCCAGGCCGCCACCCGGCTTAAGCTCTGACGTGGTACTTGTCACGGTCCGCCGGGGCCGGATTAAA	0.000700525
na	na	ATTGGCGCCAGGCCGCCACCCGGCTTAAGCTCTGACATGGTATTTCTCACGGTCCGCCGGGGCCGGATTAAA	0.000700525
na	na	ACTGGCGCCAGGCCGCCACCCGGCTTTAGCTCTGACATGGTACTTGTCACGGTCCGCCGGGGCCGGATTAAA	0.000700525
na	na	GTTGGCGCCAGGCCGCCGCCTGGCGTAGGCTCTGGCGTGGCACTCGTCACGGTCCGCCGGGGCCGGATTAAA	0.000696541
na	na	ATTGGCGCCAGGCCGCCGCCCGGCTTAGGCTCTGGCGTGGTACTTGTCACGGTCCGCCGGGGCCGGATTAAA	0.000695572
na	na	GTTGGCGCCAAGCCGCCGCTTGGTGTAAGCTCTGGCGTGGTACTCGTCACGATCCGCCGAGGCCGGATTAAA	0.000687837
na	na	ATTGGCGCCAAGCCGCCGCTTGGCGTAGGCTCTGGCGTGGTACTCGTCACGATCCGCCGAGGCCGGATTAAA	0.000687837
na	na	ATTGGCGCCAGGCCGCCACCCGGCTTAAGCTCCGACATAGTGTTTGTCTACGTCCGCCGGGGCCGGATTAAG	0.000667928
na	na	ATTGGCGCCAGGCCGCCACCCGGCTTAAGCTCTGGTGTGGTACTTGTCTCGGTCCGCCGGGGCCGGATTAGA	0.000666593
na	na	ATTGGCGCCAGGCCGCCGCCCGGCTTAAGCTCTGGTGTGGTATTTGTCTCGGTCCGCCGGGGCCGGATTAAA	0.000666593
na	na	ATTGGCGCCAGGCCGCCACCCGGCTTAAGCTCTGGCGTGGTATTTGTCACGGTCTGCCGGGGCCGGATTGAA	0.000666593
na	na	ATTGGCGCCAGGCCGCCGCCCGGCTTAAGCTCTGGCGTGATACTCGTCTCGGTCTGCCGGGGCCGGATTGGA	0.000666593
na	na	ATTGGCGCCAGGCCGCCGCCCGGCTTAAGCTCTGGTGTGATATTCGTCACGGTCTGCCGGGGCCGGATTAAA	0.000666593
na	na	ATTGGCGCCAGGCCGCCGCCCGGCTTAAGCTCTGGTGTGGTACTCGTCTCGGTCTGCCGGGGCCGGATTGAA	0.000666593
na	na	ATTGGCGCCAGGCCGCCACCCGGCTTAAGCTCTGGTGTGATATTTGTCACGGTCCGCCGGGGCCGGATTAAA	0.000666593
na	na	ATTGGCGCCAGGCCGCCGCCCGGCTTAAGCTCTGGTGTGATATTTGTCTCGGTCTGCCGGGGCCGGATTGGA	0.000666593
na	na	ATTGGCGCCAGGCCGCCGCCCGGCTTAAGCTCTGGCGTGATACTTGTCGCGGTCCGCCGGGGCCGGATTAGA	0.000666593
na	na	ATTGGCGCCAGGCCGCCGCCCGGCTTAAGCTCTGGTGTGATACTCGTCACGGTCTGCCGGGGCCGGATTGAA	0.000666593
na	na	ATTGGCGCCAGGCCGCCGCCCGGCTTAAGCTCTGGCGTGGTATTTGTCACGGTCTGCCGGGGCCGGATTGGA	0.000666593
na	na	ATTGGCGCCAGGCCGCCGCCCGGCTTAAGCTCTGGCGTGATATTCGTCACGGTCTGCCGGGGCCGGATTGAA	0.000666593
na	na	ATTGGCGCCAGGCCGCCGCCCGGCTTAAGCTCTGGTGTGATACTTGTCGCGGTCCGCCGGGGCCGGATTAAA	0.000666593
na	na	ATTGGCGCCAGGCCGCCGCCCGGCTTAAGCTCTGGTGTGATATTTGTCTCGGTCCGCCGGGGCCGGATTAGA	0.000666593
na	na	ATTGGCGCCAGGCCGCCGCCCGGCTTAAGCTCTGGTGTGATATTTGTCACGGTCTGCCGGGGCCGGATTAAA	0.000666593
na	na	ATTGGCGCCAGGCCGCCACCCGGCTTAAGCTCTGGCGTGGTATTTGTCACGGTCCGCCGGGGCCGGATTGAA	0.000666593
na	na	ATTGGCGCCAGGCCGCCGCCCGGCTTAAGCTCTGGTGTGATATTTGTCTCGGTCTGCCGGGGCCGGATTAGA	0.000666593
na	na	ATTGGCGCCAGGCCGCCGCCCGGCTTAAGCTCTGGTGTGATACTTGTCCCGGTCTGCCGGGGCCGGATTGGA	0.000666593
na	na	ATTGGCGCCAGGCCGCCGCCCGGCTTAAGCTCTGGTGTGATATTTGTCTCGGTCTGCCGGGGCCGGATTAAA	0.000666593
na	na	ATTGGCGCCAGGCCGCCACCCGGCTTAAGCTCCGACATGGTGTTTGTCACGGTCCGCCGGGACCGGATTAAA	0.000649913
na	na	ATTGGCGTCAGGCCGCCACCCGGCTTAAGCTCCGACATAGTGTTTGTCACGGTCCGCCAGGGCCGGATTAAA	0.000649913
na	na	ATTGGCGTCAGGCCGCCACCCGGCTTAAGCTCCGACATAGTGTTTGTCACGGTCCGCCGGGACCGGATTAAA	0.000649913
na	na	ATTGGCGCCAGGCCGCCGCCCGGCTTAAGCTCTGGCGTGGTATTCGTCACGGTCCGCCGAGGCCGGATTAAA	0.000625586
na	na	ATTGGCACCAGGCCGCCGCCCGGCTTAAGCTCTGGCGTGGTATTCGTCACGGTCCGCCGGGGCCGGATTAAA	0.000625586
na	na	ATTGGCGCCAGGCCGCCGCCCGGCTTAAGCTCTGGCGTGGTACTCGTCATGGTCCGCCGGGGCCGGATTAAA	0.000625586
na	na	ATTGGCGCCAGGCCGCCGCCTGGCTTAAGCTCTGGCGTGGTATTCGTCACGGTCCGCCGGGGCCGGATTAAA	0.000625586
na	na	ATTGGCGCCAGGCCGCCGCCCGGCTTAAGCTCTGGCGTGATGTTCGTCACGGTCCGCCGAGGCCGGATTAAA	0.0006054
na	na	ATTGGCGCCAGGCCGCCGCCCGGCTTAAGCTCTGGCGTGATGTTCGTCACGGTCCCCCAGGGCCGGATTAAA	0.0006054
na	na	ATTGGCGCCAGGCCGCCGCCCGGCTTAAGCTCTGGCGTGATGTTCGTCACGGTTCCCCGGGGCCGGATTAAA	0.0006054
na	na	ATTGGCGCCAGGCCGCCACCCGGCTTAAGCTCTGGCGTGATGTTCGTCACGGTCCGCCAGGGCCGGATTAAA	0.0006054
na	na	ATTGGCGCCAGGCCGCCGCCCGGCTTAAGCTCTGGCGTGATGTTCGTCACGGTCCCCCAGGACCGGATTAAA	0.0006054
na	na	ATTGGCGCCAGGCCGCCGCCCGGCTTAAGCTCTGGCGTGGTGTTCGTCACGGTTCGCCGGGGCCGGATTAAA	0.0006054
na	na	ACCGGCGCCAGGGCGCCACCCGGCTTTAGCTCTGACATGGTATTTCTCACGGTCCGCCGAGGCCGGATTAAA	0.000593331
na	na	ACTGGCGCCAGGGCGCCATCCGGCTTTAGCTCTGACATGGTATTTCTCACGGTCCGCCGAGGCCGGATTAAA	0.000593331
na	na	ATCGGCGCCAGGGCGCCATCCGGCTTTAGCTCTGACATGGTACTTCTCACGGTCCGCCGGGGCCGGATTAAA	0.000593331
na	na	ACCGGCGCCAGGGCGCCATCCGGCTTTAGCTCTGACATGGTATTTCTCAGGGTCCGCCGGGACCGGATTAAA	0.000593331
na	na	ACCGGCGCCAGGGCGTCATCCGGCTTTAGCTCTGATATGGTATTTCTCACGGTCCGCCGGGGCCGGATTAAA	0.000593331
na	na	ATCGGCGCCAGGGCGCCATCCGGCTTTAGCTCTGACATGGTATTTCTCAGGATCCGCCGGGGCCGGATTAAA	0.000593331
na	na	ACCGGCGCCAGGGCGCCATCCGGCTTTAGCTCTGACATGGTATTTCTCAGGGTCCGCCGGGGCCGAATTAAA	0.000593331
na	na	ACCGGCGCCAGGGCGCCACCCGGCTTTAGCTCTGACATGGTATTTCTCACGATCCGCCGGGGCCGGATTAAA	0.000593331
na	na	ACTGGCGCCAGGGCGCCATCCGGCTTTAGCTCTGACATGGTATTTCTCACGATCCGCCGGGGCCGGATTAAA	0.000593331
na	na	ATTGGCACCAGGCCGCCGCCCTGCTTAAGCCCTGGCGTGGTACTCGTCAGGATCCGCCAAGGCCGGATTAAA	0.000587199
na	na	ATTGGCGCCAAGCCGCCGCTTGGCGTAAGCTCTGGCGTGGTACTCGTCAAGATCCGCCGAGGCCGGATTAAA	0.000573197
na	na	GTTGGCGCCAAGCCGCCGCTTGACGTAAGCTCTGGCGTGGTACTCGTCAGGATCCGCCGAGGCCGGATTAAA	0.000573197
na	na	ATTGGCGCCAGGCCGCCGCCCGGCTTAAGCCCTGGTGTGGTACTCGTCACGGTCCGCCAGGGCCGGATTAAA	0.000570451
na	na	ACTGGCGCCAGGCCGCCACCCGGCTTTAGCTCTGACATGATATTTCTCACGGTCCGCCGGGGCCGGATTAAA	0.000569476
na	na	ACTGGCGCCAGGCCGCCACCCGGCTTTAGCTCTGACATGGTATTTGTCAGGGTCCGCCGGGGCCGGATTAAA	0.000569476
na	na	ACTGGCGCCAGGCCGCCATCCGGCTTTAGCTCTGACATGGCATTTCTCACGGTCCGCCGGGGCCGGATTAAA	0.000569476
na	na	ATTGGCGCCAGGCCGCCACCCGGCTTTAGCTCTGACATGGTATTTCTCAGGATCCGCCGGGGCCGGATTAAA	0.000569476
na	na	ATTGGCGCCAGGCCGCCATCCGGCTTTAGCTCTGACATGGTATTTCTCACGGTCCGCCGGGGCCGGATTAAA	0.000569476
na	na	ACTGGCGCCAGGCCGCCACCCGGCTTTAGCTCTGACATGGTACTTCTCAGGGTCCGCCGAGGCCGGATTAAA	0.000569476
na	na	ACTGGCGCCAGGCCGCCACCCGGCTTTAGCTCTGGCATGGCATTTCTCACGGTCCGCCGGGGCCGGATTAAA	0.000569476
na	na	ATTGGCGCCAGGCCGCCACCCGGCTTTAGCTCTGACATGGTATTTCTCACGGTCCGCCGAGGCCGGATTAAA	0.000569476
na	na	ATTGGCGCCAGGCCGCCACCCGGCTTTAGCTCTGACATGGTATTTCTCAGGGTCCGCCGGGACCGGATTAAA	0.000569476
na	na	ACCGGCGCCAGGCCGCCACCCGGCTTTAGCTCTGACATGGTATTTCTCAGGGTCCGCCGGGGCCGGATTAAA	0.000569476
na	na	ACTGGCGCCAGGCCGCCACCCGGCTTAAGCTCTGACATGGTATTTCTCAGGGTCCGCCAGGACCGGATTAAA	0.000569476
na	na	ATTGGCGCCAGGCCGCCACCCGGCTTTAGCTCTGACATGGTATTTGTCAGGGTCCGCCGGGGCCGGATTAAA	0.000569476
na	na	ACTGGCGCCAGGCCGCCACCCGGCTTAAGCTCTGACATGGTATTTCTCAGGGTCCGCCGGGACCGGATTAAA	0.000569476
na	na	ACTGGCGCCAGGCCGCCACCCGGCTTTAGCTCTGACATGGTATTTCTCAAGGTCCGCCGGGGCCGGATTAAA	0.000569476
na	na	ACTGGCGCCAGGCCGCCATCCGGCTTTAGCTCTGACATGGCATTTCTCAGGGTCCGCCGGGGCCGGATTAAA	0.000569476
na	na	ACTGGCGCCAGGCCGCCATCCGGCTTTAGCTCTGACATGGTATTTCTCAGGGTCCGCCGGGGCCGGATTAAA	0.000569476
na	na	ATTGGCGCCAGGCCGCCACCCGGCTTAAGCTCTGACATAGTGTTTGTCACGGTCCGCCAGGGCCGGATTAAA	0.000563698
na	na	ATTGGCGCCAGGCCGCCACCCGGCTTAAGCTCTGGCATGGTGCTTGTCACGGTCCGCCGGGGCCGGATTAAA	0.000562852
na	na	ATTGGCGCCAGGCCGCCACCCGGCTTAAGCTCTGACATGGTATTCGTCACGGTCCGCCGGGGCCGGATTAAA	0.000562852
na	na	ATTGGCGCCAGGCCGCCACCCGGCTTAAGCTCTGACGTGGTACTTGTCACGGTCCGCCAGGGCCGGATTAAA	0.000562852
na	na	ATTGGCGCCAGGCCGCCGCCCGGCTTAAGCTCTGGCGTGGTATTTGTCACGGTCCGCCGGGACCGGATTAAA	0.000562852
na	na	ATTGGCGCCAGGCCGCCACCCGGCTTAAGCTCTGGCATGGTATTTGTCACGGTCCGCCGGGACCGGATTAAA	0.000562852
na	na	ATTGGCGCCAGGCCGCCACCCGGCTTAAGCTCTGGCATGGTACTTGTCACGATCCGCCGGGGCCGGATTAAA	0.000562852
na	na	ATTGGCGCCAGGCCGCCACCCGGCTTAAGCTCCGACATAGTGTTTGTCTGGGTCCGCCGGGGCCGGATTAAG	0.000556607
na	na	ATTGGCGCCAGGCCGCCACCCGGCTCAAGCTCCGACATAGTGTTTGTCTCCGTCCGCCGGGGCCGGATTAAG	0.000556607
na	na	ATTGGCGCCAGGCCGCCACCCGGCTTAAGCTCCGACATAGTGTTTGTCTTCGTCCGCCGGGGCCGGATTAAG	0.000556607
na	na	ATTGGCGCCAGGCCGCCACCCGGCTGAAGCTCCGACATAGTGTTTGTCTCCGTCCGCCGGGGCCGGATTAAA	0.000556607
na	na	ATTGGCGCCAGGCCGCCGCCTGGCGTAAGCTCTGGCGTGGTACTTGTCACGGTCCGCCGGGGCCGGATTAAA	0.000555926
na	na	ATTGGCGCCAGGCCGCCGCCTGGCGTAGGCTCTGGCGTGGTACTCGTCACGATCCGCCGGGGCCGGATTAAA	0.000555926
na	na	ATTGGCGCCAGGCCGCCGCCTGGCGTAAGCTCTGGCGTGGTACTCGTTACGGTCCGCCGGGGCCGGATTAAA	0.000555926
na	na	ATTGGCGCCAGGCCGCCGCTCGGCGTAGGCTCTGGCGTGGTACTCGTCACGGTCCGCCGGGGCCGGATTAAA	0.000555926
na	na	ATTGGCGCCAGGCCGCCGCCCGGCTTAAGCTCTGACGTGATACTTGTCACGGTCCGCCGGGGCCGGATTAAA	0.000555494
na	na	ATTGGCGCCAGGCCGCCGCCCGGCTTAAGCTCTGGCGTGGTATTTGTCGCGGTCCGCCGGGGCCGGATTAAA	0.000555494
na	na	ATTGGCGCCAGGCCGCCGCCCGGCTTAAGCTCTGGCGTGGTATTTGTCAGGGTCCGCCGGGGCCGGATTAAA	0.000555494
na	na	ATTGGCGCCAGGCCGCCGCCCGGCTTAAGCTCTGGCGTGGTATTTGTCTCGGTCTGCCGGGGCCGGATTGAA	0.000555494
na	na	ATTGGCGCCAGGCCGCCGCCCGGCTTAAGCTCTGGCGTGGTACTCGTCACGGTCTGCCGGGGCCGGATTGGA	0.000555494
na	na	ATTGGCGCCAGGCCGCCGCCCGGCTTAAGCTCTGGTGTGGTATTTGTCACGGTCTGCCGGGGCCGGATTAGA	0.000555494
na	na	ATTGGCGCCAGGCCGCCGCCCGGCTTAAGCTCTGGCGTGATATTCGTCACGGTCCGCCGGGGCCGGATTGAA	0.000555494
na	na	ATTGGCGCCAGGCCGCCGCCCGGCTTAAGCTCTGGTGTGATATTCGTCTCGGTCCGCCGGGGCCGGATTGAA	0.000555494
na	na	ATTGGCGCCAGGCCGCCGCCCGGCTTAAGCTCTGGTGTGGTATTTGTCTCGGTCTGCCGGGGCCGGATTGGA	0.000555494
na	na	ATTGGCGCCAGGCCGCCACCCGGCTTAAGCTCTGGCGTGATACTTGTCACGGTCCGCCGGGGCCGGATTGAA	0.000555494
na	na	ATTGGCGCCAGGCCGCCGCCCGGCTTAAGCTCTGGCGTGGTATTTGTCCCGGTCCGCCGGGGCCGGATTAAA	0.000555494
na	na	ATTGGCGCCAGGCCGCCGCCCGGCTTAAGCTCTGGTGTGATATTTGTCTCGGTCCGCCGGGGCCGGATTGAA	0.000555494
na	na	ATTGGCGCCAGGCCGCCGCCCGGCTTAAGCTCTGGTGTGATATTTGTCACGGTCCGCCGGGGCCGGATTGAA	0.000555494
na	na	ATTGGCGCCAGGCCGCCGCCCGGCTTAAGCTCTGGCGTGGTACTTGTCCCGGTCCGCCGGGGCCGGATTAAA	0.000555494
na	na	ATTGGCGCCAGGCCGCCGCCCGGCTTAAGCTCTGGTGTGGTACTCGTCACGGTCTGCCGGGGCCGGATTAGA	0.000555494
na	na	ATTGGCGCCAGGCCGCCACCCGGCTTAAGCTCTGGCGTGGTATTTGTCGCGGTCCGCCGGGGCCGGATTAAA	0.000555494
na	na	ATTGGCGCCAGGCCGCCACCCGGCTTAAGCTCTGGCGTGGTATTTGTCACGGTCTGCCGGGGCCGGATTAGA	0.000555494
na	na	ATTGGCGCCAGGCCGCCGCCCGGCTTAAGCTCTGGCGTGATACTTGTCGCGGTCCGCCGGGGCCGGATTGAA	0.000555494
na	na	ATTGGCGCCAGGCCGCCGCCCGGCTTAAGCTCTGGCGTGATATTTGTCTCGGTCTGCCGGGGCCGGATTGAA	0.000555494
na	na	ATTGGCGCCAGGCCGCCGCCCGGCTTAAGCTCTGGTGTGGTACTCGTCTCGGTCTGCCGGGGCCGGATTAGA	0.000555494
na	na	ATTGGCGCCAGGCCGCCGCCCGGCTTAAGCTCTGGTGTGATATTTGTCTCGGTCCGCCGGGGCCGGATTAAA	0.000555494
na	na	ATTGGCGCCAGGCCGCCACCCGGCTTAAGCTCTGGCGTGGTATTTGTCTCGGTCCGCCGGGGCCGGATTGAA	0.000555494
na	na	ATTGGCGCCAGGCCGCCGCCCGGCTTAAGCTCTGGCGTGATACTTGTCGCGGTCTGCCGGGGCCGGATTGAA	0.000555494
na	na	ATTGGCGCCAGGCCGCCACCCGGCTTAAGCTCTGGCATAGTATTTGTCACGGTCCGCCGGGGCCGGATTAAA	0.00055417
na	na	ATTGGCGCCAGGCCGCCACCCGGCTTGAGCTCTGACATGGTATTTGTCACGGTCCGCCGGGGCCGGATTAAA	0.00055417
na	na	ATTGGCGCCAGGCCGCCACCCGGCTTAAGCTCTGGCATGGTATTTGTCACGATCCGCCGGGGCCGGATTAAA	0.00055417
na	na	ATTGGCGCCAGGCCGCCACCCGGCTTAAGCTCTGACATGGTATTTGTCATGGTCCGCCGGGGCCGGATTAAA	0.00055417
na	na	ATTGGCGCCAGGCCGCCACCCGGCTTAAGCTCTGACGTGGTATTTGTCAGGGTCCGCCGGGGCCGGATTAAA	0.00055417
na	na	ACTGGCGCCAGGCCGCCACCCGGCTTAAGCTCTGGCATGGTGTTTGTCACGGTCCGCCGGGGCCGGATTAAA	0.00055417
na	na	ACTGGCGCCAGGCCGCCACCCGGCTTAAGCTCTGGCATGGTATTTGTCACGGTCCGCCGAGGCCGGATTAAA	0.00055417
na	na	ATTGGCACCAGGCCGCCGCCCTGCTTAAGCCCTGGCGTAGTACTCGTCACGGTCCGCCGGGGCCGGATTAAA	0.000520969
na	na	ATTGGCACCAGGCCGCCGCCCTGCTTAAGCCCTGGCGTGGTACTCGTCACGGTCCGCCGGGACCGGATTAAA	0.000520969
na	na	ATTGGCGCCAGGCCGCCACCCGGCTTAAGCTCTGGCATGGTATTTGTCACGGTCCACCGGGGCCGGATTAAA	0.000510986
na	na	ATTGGCGCCAGGCCGCCGCCCGGCTTAAGCTCTGGCGTGGTATTTGTCACGGTCCGCCGGGGCCGGATCAAA	0.000510986
na	na	ATTGGCGCCAGGCCGCCACCCGGCTTAAGCTCTGGCGTGGTATTTGTCAGGGTCCGCCGAGGCCGGATTAAA	0.000510986
na	na	ATTGGCGCCAGGCCGCCACCCGGCTTAAGCTCTGGCATGGTGTTTGTCACGGTCCGCCAGGGCCGGGTTAAA	0.000510986
na	na	ATTGGCGCCAGGCCGCCACCCGGCTTAAGCTCTGGCGTGGTATTTGTCACGATCCGCCGGGGCCGGATCAAA	0.000510986
na	na	ATTGGCGCCAGGCCCCCACCCGGCTTAAGCTCTGGCGTGGTATTTGTCACGGTCCGCCGGGGCCGGATTAAA	0.000510986
na	na	ATTGGCGCCAGGCCGCCACCCGGCTTAAGCTCTGGCGTGGTATTTGTCACGGTCCGCCGGGACCGGGTTAAA	0.000510986
na	na	ATTGGCGCCAGGCCGCCACCCGGCTTAAGCTCTGGCATGGTATTTGTCACGGTCCGCCGGAGCCGGATTAAA	0.000510986
na	na	ATTGGCGCCAGGCCGCCACCCGGCTTAAGCTCTGGCGTGGTGTTTGTCAGGGTCCGCCGGGACCGGATTAAA	0.000510986
na	na	ATTGGCGCCAGGCCGCCGCCCGGCTTAAGCTCTGGCGTGATGTTTGTCAGGGTCCGCCAGGACCGGATTAAA	0.000510986
na	na	ATTGGCGCCAGGCCGCCACCCGGCTTTAGCTCTGGCGTGGTATTTGTCACGGTCCGCCAGGACCGGATTAAA	0.000510986
na	na	ATTGGCGCCAGGCCGCCACCCGGCTTAAGCTCTGGCGTGGTGTTTGTCAGGGTCCGCCGGGGCCGGATTAAA	0.000510986
na	na	ATTGGCGCCAGGCCGCCACCCGGCTTAAGCTCTGACATGGTATTTGTCACGGTCCGCCGGAGCCGGATTAAA	0.000510986
na	na	ATTGGTGCCAGGCCGCCACCCGGCTTAAGCTCTGGCGTGGTATTTGTCACGGTCCGCCAGGGCCGGATTAAA	0.000510986
na	na	ATTGGCGCCAGGCCGCCACCCGGCTTGAGCTCTGGCGTGGTGTTTGTCACGGTCCGCCGGGGCCGGATTAAA	0.000510986
na	na	ATTGGCGCCAGGCCGCCACCCGGCTTTAGCTCTGGCGTGGTGTTTGTCACGGTCCGCCGGGGCCGGATTAAA	0.000510986
na	na	ATTGGCGCCAGGCCGCCACCCGGCTTAAGCTCTGGCGTGGTGTTTGTCACGGTCCGCCGGAGCCGGATTAAA	0.000510986
na	na	ATTGGCGCCAGGCCGCCACCCGGCTTAAGCTCTGGCGTGGTATTTGTCAGGGTCCGCCGGGGCCGGATCAAA	0.000510986
na	na	ATTGGCGCCAGGCCGCCACCCGGCTTAAGCTCTGACGTGGTATTTGTCACGGTCCGCCGGGACCGGGTTAAA	0.000510986
na	na	ATTGGCGCCAGGCTGCCACCCGGCTTAAGCTCTGGCGTGGTATTTGTCAGGGTCCGCCGGGGCCGGATTAAA	0.000510986
na	na	ATTGGCGCCAGGCCGCCACCCGGCTTAAGCTCTGGCGTGGTATTTGTCGCGGTCCGCCGGGACCGGATTAAA	0.000510986
na	na	ATTGGCGCCAGGCCGCCACCCGGCTTGAGCTCTGGCGTGGTATTTGTCACGGTCCGCCAGGGCCGGATTAAA	0.000510986
na	na	ATTGGCGCCAGGCCGCCACCCGGCTTAAGCTCTGGCGTAGTGTTTGTCACGGTCCGCCGGGACCGGATTAAA	0.000510986
na	na	ATTGGCGCCAGGCCGCCACCCGGCTTAAGCTCTGACGTGGTGTTTGTTACGGTCCGCCGGGGCCGGATTAAA	0.000510986
na	na	ATTGGCGCCAGGCCGCCACCCGGCTTAAGCTCTGGCGTGGTGTTTGTCACGGTCCGCCGGGGCTGGATTAAA	0.000510986
na	na	ATTGGCGCCAGGCCGCCACCCGGCTTAAGCTCTGACGTGGTGTTTGTCACGGTCCGCCGGGACCGGATTAAA	0.000510986
na	na	ATTGGCGCCAGGCCGCCACCCGGCTTAAGCTCTGGCATGGTATTTGTCACGGTCCGCCAGGACCGGGTTAAA	0.000510986
na	na	ATTGGCGCCAGGCCGCCATCCGGCTTAAGCTCTGACGTGGTATTTGTCAGGGTCCGCCGGGGCCGGATTAAA	0.000510986
na	na	ATTGGCGCCAGGCCGCCACCCGGCTTAAGCTCTGGCGTGGTATTTGTCAGGGTCCGCCAGAGCCGGATTAAA	0.000510986
na	na	ATTGGCGCCAGGCCGCCACCCGGCTTAAGCTCTGGCGTGGTACTTGTCACGGTCCGCCGGGACCGGATTAAA	0.000510986
na	na	ATTGGCGCCAGGCCGCCACCCGGCCTAAGCTCTGGCGTGGTGTTTGTCACGGTCCGCCGGGGCCGGATTAAA	0.000510986
na	na	ACTGGCGCCAGGCCGCCACCCGGCTTTAGCTCTGACGTGGTATTTGTCACGGTCCGCCGGGGCCGGATTAAA	0.000510986
na	na	ATTGGCGCCAGGCCGCCACCCGGCTTAAGCTCTGGCGTGGTGTTTGTCACGGTCCGCCAGGGCCGGGTCAAA	0.000510986
na	na	ATTGGCGCCAGGCTCCCACCCGGCTTAAGCTCTGGCGTGGTATTTGTCACGGTCCGCCGGGGCCGGATCAAA	0.000510986
na	na	ATTGGCGCCAGGCCGCCACCCGGCTTAAGCTCTGGCGTGGTATTTGTCAGGGTCCGCCAGGGCCGGATTAAA	0.000510986
na	na	ATTGGCGCCAGGCCGCCACCCGACTTAAGCTCTGGCGTGGTATTCGTCACGGTCCGCCGGGGCCGGATTAAA	0.000510986
na	na	ATTGGCGCCAGGCTGCCACCCGGCTTAAGCTCTGGCGTGGTGTTTGTCACGGTCCGCCGGGGCCGGATTAAA	0.000510986
na	na	ATTGGCACCAGGCCGCCACCCGGCTTAAGCTCTGGCGTGGTATTTGTCACGGTCCGCCGGGGCCGGGTCAAA	0.000510986
na	na	ATTGGTGCCAGGCCGCCACCCGGCTTAAGCTCTGGCGTGGTATTTGTCACGGTCCGCCGGGACCGGATTAAA	0.000510986
na	na	ATTGGCGCCAGGCCGCCACCCGGCTTAAGCTCTGGCGTGGTATTTGTCACGGTCCGCCGGGACCGGATCAAA	0.000510986
na	na	ATTGGCGCCAGGCCGCCACCCGGCTTAAGCTCTGGCGTGGTATTTGTCAGGGTCCGCCGGGGCCGGGTTAAA	0.000510986
na	na	ATTGGCGCCAGGCCGCCACCCGGCTTAAGCTCTGGCGTGGTATTTGTCACGGTTCGCCAGGGCCGGATTAAA	0.000510986
na	na	ATTGGCGCCAGGCCGCCACCCGGCTTAAGCTCTGGCGTGGTGCTTGTCACGGTCCGCCGGGGCCGGATTAAA	0.000510986
na	na	ACTGGCGCCAGGCCGCCACCCGGCTTAAGCTCTGGCGTGGTATTTGTCACGGTCCGCCGGGACCGGATTAAA	0.000510986
na	na	ATTGGCGCCAGGCCGCCACCCGGCTTAAGCTCTGGCGTGGTATTTGTCACGGTCCGCCGAGGCCGGGTTAAA	0.000510986
na	na	ATTGGCGCCAGGCCGCCACCCGGCTTAAGCTCTGGCGTGGTGTTTGTCACGGTCCGCCAAGGCCGGATTAAA	0.000510986
na	na	ATTGGCGCCAGGCCGCCACCCGGCTTAGGCTCTGGCGTGGTATTTGTCACGGTCCGCCGGGACCGGATTAAA	0.000510986
na	na	ATTGGCGCCAGGCCGCCACCCGGCTTAAGCTCTGACGTGGTATTTGTCACGGTCCGCCGGGGCCGGATCAAA	0.000510986
na	na	ATTGGTGCCAGGCCGCCACCCGGCTTAAGCTCTGACGTGGTATTTGTCACGGTCCGCCGGGGCCGGATTAAA	0.000510986
na	na	ATTGGCGCCAGGCCGCCACCCGGCTTAAGCTCTGGCATGGTATTTGTCACGGTCCGCCAGAGCCGGATTAAA	0.000510986
na	na	ATTGGCGCCAGGCCGCCACCCGGCTTTAGCTCTGACGTGGTATTTGTCACGGTCCGCCGGGGCCGGATTAAA	0.000510986
na	na	ATTGGCGCCAGGCCGCCGCCCGGCTTAAGCTCTGGCGTGATGTTCGTCAAGGTCCGCCGGGGCCGGATTAAA	0.00048432
na	na	ATTGGCGCCAGGCCGCCGCCCGGCTTAAGCTCTGGCGTGATATTCGTCACGGTCTGCCAGGGCCGGATTAAA	0.00048432
na	na	ATTGGCGCCAGGCCGCCACCCGGCTTAAGCTCTGGCGTGATGTTTGTCACGGTCCGCCGGGGCCGGATTAAA	0.00048432
na	na	ATTGGCGCCAGGCCGCCGCCCGGCTTAAGCTCTGGCGTGATGTTCGTCATGGTCCGCCAGGACCGGATTAAA	0.00048432
na	na	ATTGGCGCCAGGCCGCCGCCCGGCTTAAGCTCTGGCGTGATGTTCGTCACGGTCCACCAGGGCCGGATTAAA	0.00048432
na	na	ATTGGCGCCAGGGCGCCATCCGGCTTTAGCTCTGACATGGTATTTCTCACGATCCGCCGGGGCCGGATTAAA	0.000474665
na	na	ATCGGCGCCAGGGCGCCATCCGGCTTTAGCTCTGACATGGTATTTCTCAGGGTCCGCCGAGGCCGGATTAAA	0.000474665
na	na	ATCGGCGCCAGGGCGCCATCCGGCTTTAGCTCTGACATGGTATCTCTCACGGTCCGCCGGGGCCGGATTAAA	0.000474665
na	na	ATCGGCGCCAGGGCGCCATCCGGCTTTAGCTCTGATATGGTATTTCTCACGATCCGCCGGGGCCGGATTAAA	0.000474665
na	na	ATCGGCGCCAGGCCGCCATCCGGCTTTAGCTCTGACATGGTATTTCTCACGGTCCGCCGGGGCCGGATTAAA	0.000474665
na	na	ACCGGCGCCAGGGCGTCATCCGGCTTTAGCTCTGACATGGTATTTCTCAGGGTCCGCCGGGGCCGGATTAAA	0.000474665
na	na	ACCGGCGCCAGGGCGCCATCCGGCTTTAGCTCTGACATGGTATTTCTCACGATCCGCCGAGGCCGGATTAAA	0.000474665
na	na	ACCGGCGCCAGGGCGCCATCCGGCTTTAGCTCTGATATGGTATTTCTCAAGGTCCGCCGGGGCCGGATTAAA	0.000474665
na	na	ACCGGCGCCAGGGCGCCACCCGGCTTTAGCTCTGACATGGCATTTCTCACGGTCCGCCGGGGCCGGATTAAA	0.000474665
na	na	ACCGGCGCCAGGGCGCCATCCGGCTTTAGCTCTGACATGGTACTTCTCAGGGTCCGCCGGGGCCGGATTAAA	0.000474665
na	na	ATTGGCGCCAGGCCGCTGCCTGGCGTTGGCTCTGGCGTGGCACTCGTCACGGTCCGCCGGGGCCGGATTAAA	0.00046436
na	na	ATTGGCGCCAGGCCGCCGCCCGGCGTAGGCTCTGGCGTGGCACTCGTCACGGTCCGCCGGGGCCGGATTAAA	0.00046436
na	na	ATTGGCGCCAGGCCGCCGCCCGGCTTAAGCTCTGGCGTGGCACTCGTCACGGTCCGCCGGGGCCGGATTAAA	0.000463714
na	na	ATTGGCGCCAGGCCGCCGCTCGGCTTAAGCTCTGGCGTGGTACTCGTCACGGTCCGCCGGGGCCGGATTAAA	0.000463714
na	na	ATTGGCGCCAGGCCGCCGCCCAGCTTAAGCTCTGGCGTGGTACTCGTCACGGTCCGCCGGGGCCGGATTAAA	0.000463714
na	na	GTTGGCGCCAGGCCGCCGCTTGGCGTAAGCTCTGGCGTGGTACTCGTCACGGTCCGCCGGGGCCGGATTAAA	0.000462214
na	na	GTTGGCGCCAAGCCGCCGCTTGGCGTAGGCTCTGGCGTGGTACTCGTCTCCGTCCGACAGGGCCGGATTAAA	0.000454236
na	na	ATTGGCGCCAGGCCGCCACCCGGCTTAAGCTCCGACATGGTGTTTGTCACCGTCCGCCGGGGCCGGATTAAA	0.000450958
na	na	ATTGGCGCCAGGCCGCCACCCGGCTTAAGCTCCGACATAGTATTTGTCACGGTCCGCCAGGGCCGGATTAAA	0.000450958
na	na	ATTGGCGCCAGGCCGCCACCCGGCTGAAGCTCCGACATGGTGTTTGTCACGGTCCGCCGGGGCCGGATTAAA	0.000450958
na	na	ATTGGCGCCAGGCCGCCACCCGGCTGAAGCTCCGACATAGTGTTTGTCACGGTCCGCCAGGGCCGGATTAAA	0.000450958
na	na	ACTGGCGCCAGGCCGCCGCCCGGCTTAAGCCCTGGTGTGGTACCCGTCAGGATCCGCCGGGGCCGGATTAAA	0.000446229
na	na	ACTGGCGCCAGGCCGCCGCCCGGCTTAAGCCCTGGTGTGGTACCCGTCAGGATCCGCCGAGGCCGGATTAAA	0.000446229
na	na	ATTGGCGCCGGGCCGCCACCCGGCTGAAGCTCCGACATAGTGTTTGTCTCCGTCCGCCGGGGCCGGATTAAG	0.000445286
na	na	ATTGGCGCCGGGCCGCCACCCGGCTTAAGCTCCGACATAGTGTTTGTCTCCGTCCGCCGGGGCCGGATTAAA	0.000445286
na	na	ATTGGCGCCAGGCCGCCACCCGGCTTAAGCTCCGACATAGTGTTTGTCTCCGTCCGCCGGGACCGGATTAAG	0.000445286
na	na	ATTGGCGCCAGGCCGCCACCCGGCTTAAGCTCCGACATGGTGTTTGTCTCGGTCCGCCGGGGCCGGATTAAG	0.000445286
na	na	ATTGGCGCCAGGCCGCCGCCTGGCGTAAGCTCTGACGTGGTACTCGTCACGGTCCGCCGGGGCCGGATTAAA	0.000444741
na	na	ATTGGCGCCAGGCCGCCGCTCGGCGTAAGCTCTGGCGTGGTACTCGTCACGGTCCGCCGGGGCCGGATTAAA	0.000444741
na	na	GTTGGCGCCAAGCCGCCGCTTGGCGTAGGCTCTGGCGTGGTACTCGTCTCTGTCCGCCGGGGCCGGATTAAG	0.000444395
na	na	ATTGGCGCCAGGCCGCCGCCCGGCTTAAGCTCTGGCGTGATACTCGTCACGGTCCGCCGGGACCGGATTAAA	0.000444395
na	na	ACTGGCGCCAGGCCGCCACCCGGCTTAAGCTCTGGCGTGGTACTTGTCACGGTCCGCCGGGGCCGGATTAAA	0.000444395
na	na	ATTGGCGCCAGGCCGCCGCCCGGCTTAAGCTCTGGCGTGGTACTTGTCACGATCCGCCGGGGCCGGATTAAA	0.000444395
na	na	ATTGGCGCCAGGCCGCCGCCCGGCTTAAGCTCTGGTATGGTACTTGTCACGGTCCGCCGGGGCCGGATTAAA	0.000444395
na	na	ATTGGCGCCAGGCCGCCGCCCGGCTTAAGCTCTGACGTGATATTTGTCACGGTCCGCCGGGGCCGGATTAAA	0.000444395
na	na	ATTGGCGCCAGGCCGCCGCCCGGCTTAAGCTCTGGCATGGTACTTGTCTCGGTCCGCCGGGGCCGGATTAAA	0.000444395
na	na	ATTGGCGCCAGGCCGCCGCCCGGCTTAAGCTCTGACGTGATACTTGTCACGGTCTGCCGGGGCCGGATTAAA	0.000444395
na	na	ATTGGCGCCAGGCCGCCACCCGGCTTAAGCTCTGGCGTGATATTTGTCACGGTCCGCCGGGGCCGGATTAGA	0.000444395
na	na	ATTGGCGCCAGGCCGCCGCCCGGCTTAAGCTCTGGCGTGATGCTTGTCACGGTCCGCCGGGGCCGGATTAAA	0.000444395
na	na	ATTGGCGCCAGGCCGCCGCCCGGCTTAAGCTCTGGTGTGGTATTTGTCACGGTCCGCCGGGGCCGGATTGGA	0.000444395
na	na	ATTGGCGCCAGGCCGCCGCCCGGCTTAAGCTCTGGCGTGATACTCGTCGCGGTCCGCCGGGGCCGGATTAAA	0.000444395
na	na	ATTGGCGCCAGGCCGCCGCCCGGCTTAAGCTCTGGTGTGGTACTTGTCGCGGTCCGCCGGGGCCGGATTAAA	0.000444395
na	na	ATTGGCGCCAGGCCGCCGCCCGGCTTAAGCTCTGGCGTGGTACTCGTCTCGGTCCGCCGGGGCCGGATTGGA	0.000444395
na	na	ATTGGCGCCAGGCCGCCGCCCGGCTTAAGCTCTGGTGTGATATTTGTCACGGTCCGCCGGGGCCGGATTGGA	0.000444395
na	na	ATTGGCGCCAGGCCGCCGCCCGGCTTAAGCTCTGGCGTGATATTTGTCACGGTCCGCCGGGACCGGATTAAA	0.000444395
na	na	ATTGGCGCCAGGCCGCCGCCCGGCTTAAGCTCTGATGTGGTACTTGTCACGGTCCGCCGGGGCCGGATTAAA	0.000444395
na	na	ATTGGCGCCAGGCCACCGCCCGGCTTAAGCTCTGGCGTGGTACTTGTCACGGTCCGCCGGGGCCGGATTAAA	0.000444395
na	na	ATTGGCGCCAGGCCGCCACCCGGCTTAAGCTCTGGCGTGATACTTGTCACGGTCCGCCGGGGCCGGATTGGA	0.000444395
na	na	ATTGGCGCCAGGCCGCCGCCCGGCTTAAGCTCTGGCGTGATACTTGTCGCGGTCTGCCGGGGCCGGATTAAA	0.000444395
na	na	ATTGGCGCCAGGCCGCCGCCCGGCTTAAGCTCTGGCGTGGTATTTGTCTCGGTCCGCCGGGGCCGGATTGGA	0.000444395
na	na	ATTGGCGCCAGGCCGCCGCCCGGCTTAAGCTCTGGTGTGATATTTGTCACGGTCTGCCGGGGCCGGATTGAA	0.000444395
na	na	ATTGGCGCCAGGCCGCCGCCCGGCTTAAGCTCTGGCGTGGTACTTGTCACGGTCCACCGGGGCCGGATTAAA	0.000444395
na	na	ATTGGCGCCAGGCCGCCGCCCGGCTTAAGCTCTGGCGTGATACTTGTCACGGTCCGCCGGGACCGGATTAAA	0.000444395
na	na	ATTGGCGCCAGGCCGCCGCCCGGCTTAAGCTCTGGCGTGGTACTTGTCCCGGTCTGCCGGGGCCGGATTAAA	0.000444395
na	na	ATTGGCGCCAGGCCGCCGCCCGGCTTAAGCTCTGGTGTGGTACTCGTCACGGTCTGCCGGGGCCGGATTGGA	0.000444395
na	na	ATTGGCGCCAGGCCGCCGCCCGGCTTAAGCTCTGGTGTGATACTTGTCGCGGTCCGCCGGGGCCGGATTGGA	0.000444395
na	na	ATTGGCGCCAGGCCGCCACCCGGCTTAAGCTCTGGTGTGGTATTTGTCACGGTCCGCCGGGGCCGGATTGAA	0.000444395
na	na	ATTGGCGCCAGGCCGCCGCCCGGCTTAAGCTCTGGTATGATACTTGTCTCGGTCCGCCGGGGCCGGATTAAA	0.000444395
na	na	ATTGGCGCCAGGCCGCCGCCCGGCTTAAGCTCTGGTGTGGTATTTGTCTCGGTCTGCCGGGGCCGGATTAGA	0.000444395
na	na	ATTGGCGCCAGGCCGCCGCCCGGCTTAAGCTCTGGTGTGGTATTTGTCTCGGTCCGCCGGGGCCGGATTGAA	0.000444395
na	na	ATTGGCGCCAGGCCGCCGCCCGGCTTAAGCTCTGGTGTGATACTTGTCGCGGTCTGCCGGGGCCGGATTGGA	0.000444395
na	na	ATTGGCGCCAGGCCGCCACCCGGCTTAAGCTCTGGCGTGGTACTTGTCACGGTCTGCCGGGGCCGGATTGAA	0.000444395
na	na	ATTGGCGCCAGGCCGCCGCCCGGCTTAAGCTCTGGCGTGGTATTTGTCACGATCCGCCGGGGCCGGATTAAA	0.000444395
na	na	ATTGGCGCCAGGCCGCCGCCCGGCTTAAGCTCTGGCGTGGTACTCGTCTCGGTCTGCCGGGGCCGGATTGGA	0.000444395
na	na	ATTGGCGCCAGGCCGCCGCCCGGCTTAAGCTCTGGCGTGGTACTTGTCACAGTCCGCCGGGGCCGGATTAGA	0.000444395
na	na	ATTGGCGCCAGGCCGCCGCCCGGCTTAAGCTCTGACGTGGTACTTGTCTCGGTCCGCCGGGGCCGGATTAGA	0.000444395
na	na	ATTGGCGCCAGGCCGCCGCCCGGCTTAAGCTCTGACGTGGTACTTGTCACGGTCCGCCGGGGCCGGATTGAA	0.000444395
na	na	ATTGGCGCCAGGCCGCCACCCGGCTTAAGCTCTGGTGTGGTACTTGTCACGGTCCGCCGGGGCCGGATTAGA	0.000444395
na	na	ATTGGCGCCAGGCCGCCGCCCGGCTTGAGCTCTGGCGTGGTACTTGTCACGGTCCGCCGGGGCCGGATTAAA	0.000444395
na	na	ATTGGCGCCAGGCCGCCGCCCGGCTTAAGCTCTGGCGTGATACTCGTCTCGGTCCGCCGGGGCCGGATTGGA	0.000444395
na	na	ATTGGCGCCAGGCCGCCGCCCGGCTTAAGCTCTGGCGTGATATTTGTCTCGGTCCGCCGGGGCCGGATTGGA	0.000444395
na	na	ATTGGCGCCAGGCCGCCGCCCGGCTTAAGCTCTGGTGTGGTATTCGTCACGGTCCGCCGGGGCCGGATTAGA	0.000444395
na	na	ATTGGCGCCAGACCGCCGCCCGGCTTAAGCTCTGGCGTGGTACTTGTCACGGTCCGCCGGGGCCGGATTAAA	0.000444395
na	na	ATTGGCGCCAGGCCGCCGCCCGGCTTAAGCTCTGGCGTGGTATTCGTCACGGTCTGCCGGGGCCGGATTGAA	0.000444395
na	na	ATTGGCGCCAGGCCGCCGCCCGGCTTAAGCTCTGGTGTGATGCTTGTCACGGTCCGCCGGGGCCGGATTAAA	0.000444395
na	na	ATTGGCGCCAGGCCGCCGCCCGGCTTAAGCTCTGGCATGATACTCGTCACGGTCCGCCGGGGCCGGATTAAA	0.000444395
na	na	ACTGGCGCCAGGCCGCCACCCGGCTTAAGCTCTGACATGGTACCTGTCACGATCCGCCGGGGCCGGATTAAA	0.000441891
na	na	ACTGGCGCCAGGCCGCCACCCGGCTTAAGCTCTGACATGGTACTTGTCAGGATCCGCCAGGGCCGGATTAAA	0.000441891
na	na	GCTGGCGCCAGGCCGCCACCCGGCTTAAGCTCTGACATGGTACCTGTCACGGTCCGCCGAGGCCGGATTAAA	0.000441891
na	na	ATTGGCGCCAGGTCGCCACCCGGCTTAAGCTCTGGCATGGTACTTGTCACGGTCCGCCGGGGCCGGATTAAA	0.000441891
na	na	ACTGGCGCCAGGCCGCCACCCGGCTTAAGCTCTGACGTGGTATTTGTCACGGTCCGCCAGGGCCGGATTAAA	0.000441891
na	na	ACTGGCGCCAGGCCGCCACCCGGCTTAAGCTCTGGCATGGTACTCGTCACGGTCCGCCGGGGCCGGATTAAA	0.000441891
na	na	ATTGGCGCCAGGCCGCCACCCGGCTTAAGCTCTGACATGGTACTTGTCAGGGTCCGCCAAGGCCGGATTAAA	0.000441891
na	na	ACTGGCGCCAGGCCGCCATCCGGCTTAAGCTCTGACATGGTATTTGTCACGGTCCGCCAGGGCCGGATTAAA	0.000441891
na	na	ACTGGCGCCAGGCCGCCACCCGGCTTAAGCTCTGACATGGCACTTGTCAGGGTCCGCCAAGGCCGGATTAAA	0.000441891
na	na	ATTGGCGCCAGGCCGCCACCCGGCTTAAGCTCTGACATGGTACCTGTCACGGTCCGCCGGGGCCGGATTAAA	0.000441891
na	na	ACTGGCGCCAGGCCGCCACCCGGCTTAAGCTCTGACATGGCACTTGTCACGATCCGCCAGGGCCGGATTAAA	0.000441891
na	na	ACTGGCGCCAGGCCGCCACCCGGCTTAAGCTCTGACATGGTACTTGTCAGGGTCCGCCAGGGCCGGGTTAAG	0.000441891
na	na	ACTGGCGCCAGGCCGCCACCCGGCTTAAGCTCTGACATGGTACTTGTCAGGGTCCGCCAGGGCCGGGTTAAA	0.000441891
na	na	ACTGGCGCCAGGCCGCCACCCGGCTTAAGCTCTGGCATGGTACTTGTCAAGGTCCGCCAGGGCCGGATTAAA	0.000441891
na	na	ACTGGCGCCAGGCCGCCACCCGGCTTAAGCTCTGACATGGTACTTGTCACGATCCGCCAAGGCCGGATTAAA	0.000441891
na	na	ACTGGCGCCAGGCCGCCACCCGGCTTAAGCTCTGACATGGTACTTGTCACGGTCCGCCGAGGCCGGGTTAAA	0.000441891
na	na	ACTGGCGCCAGGCCGCCACCCGGCTTAAGCTCTGACATGGTATTTGTCACGGTCCGCCAGGGCCGGGTTAAA	0.000441891
na	na	ACTGGCGCCAGGCCGCCACCCGGCTTAAGCTCTGACATGGCACTTGTCACGATCCGCCGAGGCCGGATTAAA	0.000441891
na	na	ACTGGCGCCAGGCCGCCACCCGGCTTAAGCTCTGACATGGTACTTGTCACGATCCACCGAGGCCGGATTAAA	0.000441891
na	na	ACTGGCGCCAGGCCGCCACCCGGCTTAAGCTCTGACATGATACTTGTCACGGTCCGCCGGGGCCGGATTAAA	0.000441891
na	na	ACTGGCGCCAGGCCGCCACCCGGCTTAAGCTCTGGCATGGTACTTGTCAGGATCCGCCAGGGCCGGATTAAA	0.000441891
na	na	ACTGGCGCCAGGCCGCCACCCGGCTTAAGCTCTGACATGGTACTTGTCACGATCCGCCGAGGCCGGGTTAAA	0.000441891
na	na	ACTGGCGCCAGGCCGCCACCCGGCTTAAGCTCTGACATGGCACCTGTCACGGTCCGCCAGGGCCGGATTAAA	0.000441891
na	na	ACTGGCGCCAGGCCGCCACCCGGCTTAAGCTCTGACATGGTACTTGTCACGATCCGCCGGAGCCGGATTAAA	0.000441891
na	na	ACTGGCGCCAGGCCGCCACCCGGCTTAAGCTCTGACATGGTACCTGTCAGGGTCCGCCAGGGCCGGATTAAA	0.000441891
na	na	ACTGGCGCCAGGCCGCCACCCGGCTTAAGCTCTGACATGGCACCTGTCACGGTCCGCCGAGGCCGGATTAAA	0.000441891
na	na	ATTGGCGCCAGGCCGCCACCCGGCTTAAGCTCTGACATGGTACTTGTCACGGTCCGCCAAGGCCGGATTAAA	0.000441891
na	na	ACTGGCGCCAGGCCGCCACCCGGCTTAAGCTCTGACATGGTACTTGTCACGGTCCGCCGAGACCGGATTAAA	0.000441891
na	na	ACTGGCGCCAGGCCGCCACCCGGCTTAAGCTCTGGCATGGTACTTGTCACGATCCGCCAAGGCCGGATTAAA	0.000441891
na	na	ACTGGCGCCAGGCCGCCACCCGGCTTAAGCTCTGACATGGTATTTGTCAAGGTCCGCCGGGGCCGGATTAAA	0.000441891
na	na	ACTGGCGCCAGGCCGCCACCCGGCTTAAGCTCTGGCATGGCACTTGTCACGATCCGCCAGGGCCGGATTAAA	0.000441891
na	na	ACTGGCGCCAGGCCGCCACCCGGCTTAAGCTCTGACATGGTACTTGTCAGGATCCGCCGAGGCCGGATTAAA	0.000441891
na	na	ATTGGCGCCAGGCCGCCACCCGGCTTAAGCTCTGACATGGTACTTGTCACGGTCCGCCGAGGCCGGATTAAA	0.000441891
na	na	ACTGGCGCCAGGCCGCCACCCGGCTTAAGCTCTGGCATGGTATTTGTCACGATCCGCCGGGGCCGGATTAAA	0.000441891
na	na	ACTGGCGCCAGGCCGCCACCCGGCTTAAGCTCTGACATGGCATTTGTCAAGGTCCGCCGGGGCCGGATTAAA	0.000441891
na	na	ACTGGCGCCAGGCCGCCACCCGGCTTAAGCTCTGACATGGTACTTGTCAGGGTCCGCCGAGGCCGGGTTAAA	0.000441891
na	na	ACTGGCGCCAGGCCGCCACCCGGCTTAAGCTCTGGCATGGTACCTGTCAGGGTCCGCCGGGGCCGGATTAAA	0.000441891
na	na	ACTGGCGCCAGGCCGCCACCCGGCTTAAGCTCTGGCATGGCACTTGTCACGATCCGCCGAGGCCGGATTAAA	0.000441891
na	na	ACTGGCGCCAGGCCGCCACCCGGCTTAAGCTCTGACATGGTACTTGTCAGGGTCCGCCAAGGCCGGATTAAA	0.000441891
na	na	ACTGGCGCCAGGCCGCCACCCGGCTTAAGCTCTGACATGGTACTTGTCAGGGTCCGCCGGGGCCGGGTTAAA	0.000441891
na	na	ACTGGCGCCAGGCCGCCACCCGGCTTAAGCTCTGGCATGGTACTTGTCACGATCCGCCGGGGCCGGGTTAAA	0.000441891
na	na	ACTGGCGCCAGGCCGCCACCCGGCTTAAGCTCTGGCATGGTATTTGTCAGGGTCCGCCAAGGCCGGATTAAA	0.000441891
na	na	ATTGGCGCCAGGCCGCCACCCGGCTTAAGCTCTGACATAGTACTTGTCACGGTCCGCCAGGGCCGGATTAAA	0.000441891
na	na	ACTGGCGCCAGGCCGCCACCCGGCTTAAGCTCTGGCATGGTACTTGTCAAGGTCCGCCGGGGCCGGATTAAA	0.000441891
na	na	ACTGGCGCCAGGCCGCCACCCGGCTTAAGCTCTGACATGGCACTTGTCACGGTCCGCCGGGGCCGGGTTAAA	0.000441891
na	na	ACTGGCGCCAGGCCGCCACCCGGCTTAAGCTCTGGCATGGTACTTGTCACGGTCCGCCGGGACCGGATTAAA	0.000441891
na	na	ACTGGCGCCAGGCCGCCACCCGGCTTAAGCTCTGGCATGGTACTTGTCACGATCCGCCGAGGCCGGGTTAAA	0.000441891
na	na	ACTGGCGCCAGGCCGCCACCCGGCTTAAGCTCTGGCATGGCACTTGTCAGGATCCGCCGGGGCCGGATTAAA	0.000441891
na	na	ACTGGCGCCAGGCCGCCACCCGGCTTAAGCTCTGGCATGGTACCTGTCACGGTCCGCCGGGGCCGGATTAAA	0.000441891
na	na	ACTGGCGCCAGGCCGCCACCCGGCTTAAGCTCTGGCATGGCATTTGTCAGGGTCCGCCGGGGCCGGATTAAA	0.000441891
na	na	ACTGGCGCCAGGCCGCCACCCGGCTTAAGCTCTGGCATGGTACCTGTCACGGTCCGCCAAGGCCGGATTAAA	0.000441891
na	na	ACTGGCGCCAGGCCGCCACCCGGCTTAAGCTCTGGCATGGCACTTGTCAGGATCCGCCAAGGCCGGATTAAA	0.000441891
na	na	ACTGGCGCCAGGCCGCCACCCGGCTTAAGCTCTGGCATGGTACTTGTCAGGGTCCGCCAAGGCCGGATTAAA	0.000441891
na	na	ACTGGCGCCAGGCCGCCACCCGGCTTAAGCTCTGACATGGTACTTGTCACGATCCGCCAGGGCCGGGTTAAA	0.000441891
na	na	ACTGGCGCCAGGCCGCCACCCGGCTTAAGCTCTGGCATGGTACCTGTCACGGTCCGCCGAGGCCGGATTAAA	0.000441891
na	na	ACTGGCGCCAGGCCGCCACCCGGCTTAAGCTCTAACATGGTACTTGTCACGGTCCGCCGGGGCCGGATTAAA	0.000441891
na	na	ACTGGCGCCAGGCCGCCACCCGGCTTAAGCTCTGACATGGCACTTGTCAGGGTCCGCCGGGGCCGGGTTAAA	0.000441891
na	na	ACTGGCGCCAGGCCGCCACCCGGCTTAAGCTCTGACATGGTATTTGTCACGATCCGCCAGGGCCGGATTAAA	0.000441891
na	na	ACTGGCGCCAGGCCGCCACCCGGCTTAAGCTCTGACATGGTACTTGTCACGGTCCGCCGGGGCCAGATTAAA	0.000441891
na	na	ACTGGCGCCAGGCCGCCACCCGGCTTAAGCTCTGACATGGTACTTGTCACGGTCCGCCAGAGCCGGATTAAA	0.000441891
na	na	ATTGGCGCCAGGCCGCCACCCGGCTTAAGCTCTGACATGGCACTTGTCACGATCCGCCGAGGCCGGATTAAA	0.000441891
na	na	ACTGGCGCCAGGCCGCCACCCGGCTTGAGCTCTGACATGGTACTTGTCACGGTCCGCCGGGGCCGGATTAAA	0.000441891
na	na	ACTGGCGCCAGGCCGCCACCCGGCTTAAGCTCTGGCATGGCACTTGTCAGGGTCCGCCAGGGCCGGATTAAA	0.000441891
na	na	ACTGGCGCCAGGCCGCCACCCGGCTTAAGCTCTGGCATGGTATTTGTCACGGTCCGCCGGGGCCGGGTTAAA	0.000441891
na	na	ACTGGCGCCAGGCCGCCACCCGGCTTAAGCTCTGACATGGCACTTGTCAGGGTCCGCCGAGGCCGGATTAAA	0.000441891
na	na	ACTGGCGCCAGGCCGCCACCCGGCTTAAGCTCTGGCATGGTATTTGTCAGGGTCCGCCAGGGCCGGATTAAA	0.000441891
na	na	ACTGGCGCCAGGCCGCCACCCGGCTTAAACTCTGACATGGTACTTGTCACGATCCGCCGGGGCCGGGTTAAA	0.000441891
na	na	ACTGGCGCCAGGCCGCCACCCGGCTTAAGCTCTGGCATGGCGCTTGTCACGGTCCGCCGGGGCCGGATTAAA	0.000441891
na	na	ACTGGCGCCAGGCCGCCACCCGGCTTAAGCTCTGGCATGGCACTTGTCACGGTCCGCCGGGGCCGGGTTAAA	0.000441891
na	na	ATTGGCGCCAGGCCGCCACCCGGCTTAAGCTCTGACATGGTACTTGTCACGATCCGCCGGGGCCGGATTAAA	0.000441891
na	na	ACTGGCGCCAGGCCGCCACCCGGCTTAAGCTCTGACATGGCATTTCTCAGGGTCCGACAGGACCGGATTAAA	0.000437828
na	na	ATTGGCGCCAGGCCGCCACCCGGCTTAAGCTCCGACATAGTGTTTGTCAAGGTCCGCCGGGGCCGGATTAAA	0.000433276
na	na	ATTGGCGTCAGGCCGCCACCCGGCTTAAGCTCCGACATAGTGTTTGTCAGGGTCCGCCGGGACCGGATTAAA	0.000433276
na	na	ATTGGCGCCAGGCCGCCACCCGGCTTAAGCTCCGACATAGTGTTTGTCACAGTCCGCCGGGGCCGGATTAAA	0.000433276
na	na	ATTGGCACCAGGCCGCCGCCCAGCTTAAGCCCTGGCGTGGTACTCGTCACGGTCCGCCGGGGCCGGATTAAA	0.000416233
na	na	ATTGGCACCAGGCCGCCGCCCTGCTTAAGCTCTGGCGTGGTACTCGTCACGGTCCGCCGGGGCCGGATTAAA	0.000416233
na	na	ATTGGCACCAGGCCGCCGCCCGGCTTAAGCCCTGGCGTGGTACTCGTCACGATCCGCCGGGGCCGGATTAAA	0.000416233
na	na	ATTGGCACCAGGCCGCCGCCCTGCTTAAGCCCTGGCGTGGTACTCGTCACGGTCTGCCGGGGCCGGATTAAA	0.000416233
na	na	ATTGGCGCCAGGCCGCCGCCCCGCTTAAGCCCTGGCGTGGTACTCGTCACGGTCCGCCGGGGCCGGATTAAA	0.000400748
na	na	ACTGGCGCCAGGCCGCCACCCGGCTTTAGCTCTGACATGGTATTTCTCAAGGTCCGCCAGGACCGGATTAAA	0.000395726
na	na	ACTGGCGCCAGGCCGCCACCCGGCTTTAGCTCTGACATGGCATTTCTCATGGTCCGCCGGGGCCGGATTAAA	0.000395726
na	na	ACTGGCGCCAGGCCGCCACCCGGCTTTAGCTTTGACATGGCATTTCTCAGGGTCCGCCGGGGCCGGATTAAA	0.000395726
na	na	ATTGGCACCAGGCCGCCGCCCTGCTTAAGCCCTGGCGTGGTACTCGTCAGGATCCGCCGAGACCGGATTAAA	0.000391466
na	na	ATTGGCGCCAGGCCGCCGCCCGGCTTAAGCCCTGGTGTGGTACCTGTCACGGTCCGCCGGGGCCGGATTAAA	0.0003803
na	na	ATTGGCGCCAGGCCGCCGCCCGGCTTAAGCCCTGGTGTGGTACTTGTCAGGGTCCGCCGGGGCCGGATTAAA	0.0003803
na	na	ACTGGCGCCAGGCCGCCGCCCGGCTTAAGCCCTGGTGTGGTACCCGTCACGGTCCGCCGGGGCCGGATTAAA	0.0003803
na	na	ATTGGCGCCAGGCCGCCGCCCGGCTTAAGCCCTGGTGTGATACTCGTCACGGTCCGCCGGGGCCGGATTAAA	0.0003803
na	na	ACTGGCGCCAGGCCGCCGCCCGGCTTAAGCCCTGGTGTGGTACTCGTCAGGGTCCGCCGGGGCCGGATTAAA	0.0003803
na	na	ATTGGCGCCAGGCCGCCACCCGGCTTAAGCTCTGGCATGGTATTTGTCACGGTCCGCCGAGGCCGGATTAAA	0.000375235
na	na	ATTGGCGCCAGGCCGCCACCCGGCTTAAGCTCTGACATGGTGCTTGTCACGGTCCGCCGGGGCCGGATTAAA	0.000375235
na	na	ATTGGCGCCAGGCCGCCACCCGGCTTAAGCTCTGACGTGGTATTCGTCACGGTCCGCCGGGGCCGGATTAAA	0.000375235
na	na	ATTGGCGCCAGGCCGCCACCCGGCTTAAGCTCTGGCATGGTATTCGTCACGGTCCGCCGGGGCCGGATTAAA	0.000375235
na	na	ATTGGCGCCAGGCCGCCACCCGGCTTAAGCTCTGATATGGTATTTGTCACGGTCCGCCGGGGCCGGATTAAA	0.000375235
na	na	ACTGGCGCCAGGCCGCCACCCGGCTTAAGCTCTGGCGTGGTGTTTGTCACGGTCCGCCGGGGCCGGATTAAA	0.000375235
na	na	ATTGGCGCCAGGCTGCCACCCGGCTTAAGCTCTGGCATGGTATTTGTCACGGTCCGCCGGGGCCGGATTAAA	0.000375235
na	na	ATTGGCGCCAGGCCGCCACCCGGCTTTAGCTCTGGCATGGTATTTGTCACGGTCCGCCGGGGCCGGATTAAA	0.000375235
na	na	ATTGGCGCCAGGCCGCCGCCCGGCTTAAGCTCTGGCGTGATGTTCGTCAGGGTCTGCCAGGGCCGGATTAAA	0.00036324
na	na	ATTGGCGCCAGGCCGCCGCCCGGCTTAAGCTCTGGCGTGGTATTCGTCACGGTCCGCCGGGACCGGATTAAA	0.00036324
na	na	ATTGGCGCCAGGCCGCCGCCCGGCTTAAGCTCTGGCGTGATGCTCGTCACGGTCCGCCAGGACCGGATTAAA	0.00036324
na	na	ATTGGCGCCAGGCCGCCGCCCGGCTTAAGCTCTGGCGTGATGTTCGTCACGGTCCCCCGGGACCGGATTAAA	0.00036324
na	na	ATTGGCGCCAGGCCGCCGCCCGGCTTAAGCTCTGGCGTGATGTTCGTCACGGTTTGCCGGGACCGGATTAAA	0.00036324
na	na	ATTGGCGCCAGGCCGCCGCCCGGCTTAAGCTCTGGCGTGATGTTCGTCAAGGTCCGCCAGGGCCGGATTAAA	0.00036324
na	na	ATTGGCGCCAGGCCGCCGCCCGGCTTAAGCCCTGGCGTGATGTTCGTCACGGTCCGCCGGGGCCGGATTAAA	0.00036324
na	na	ATTGGCGCCAGGCCGCCACCCGGCTTAAGCTCTGGCGTGATGTTCGTCACGGTCCGCCGGGACCGGATTAAA	0.00036324
na	na	ATTGGCGCCAGGCCGCCGCCCGGCTTAAGCTCTGGCGTGATGTTCGTCACGGTTTGCCAGGGCCGGATTAAA	0.00036324
na	na	ATTGGCGCCAGGCCGCCGCCCGGCTTAAGCTCTGGCGTGATATTCGTCACGGTTTGCCGGGGCCGGATTAAA	0.00036324
na	na	ATTGGCGCCAGGCCGCCGCCCGGCTTAAGCTCTGGCGTGATATTCGTCACGGTCTGCCGGGACCGGATTAAA	0.00036324
na	na	ATTGGCGCCAGGCCGCCACCCGGCTTTAGCTCTGACATGGCATTTCTCACGGTCCGCCGGGACCGGATTAAA	0.000360881
na	na	ATTGGCGCCAGGCCGCCACCCGGCTTTAGCTCTGACATGGCATTTCTCAGGGTCCGCCAGGACCGGATTAAA	0.000360881
na	na	ACTGGCGCCAGGGCGCCATCCGGCTTTAGCTCTGACATGGTATTTCTCACGGTCCGCCGGGGCCGAATTAAA	0.000355999
na	na	ACCGGCGCCAGGGCGCCATCCGGCTTTAGCTCTGATATGGTACTTCTCAGGGTCCGCCGGGGCCGGATTAAA	0.000355999
na	na	ACCGGCGCCAGGGCGCCATCCGGCTTTAGCTCTGATATGGTATTTCTCACGGTCCGCGGGGGCCGGATTAAA	0.000355999
na	na	ACCGGCGCCAGGGCGCCACCCGGCTTTAGCTCTGGCATGGTATTTCTCACGGTCCGCCGGGGCCGGATTAAA	0.000355999
na	na	ACCGGCGCCAGGCCGCCATCCGGCTTTAGCTCTGACATGGCATTTCTCACGGTCCGCCGGGGCCGGATTAAA	0.000355999
na	na	ACCGGCGCCAGGGCGCCATCCGGCTTTAGCTCTGACATGGTATTTCTCACGGTCCGCCGGGGGCGGATTAAA	0.000355999
na	na	ACTGGCGCCAGGGCGCCATCCGGCTTTAGCTCTGACATGGTATTTCTCAGGATCCGCCGGGGCCGGATTAAA	0.000355999
na	na	ACCGGCGCCAGGGCGTCATCCGGCTTTAGCTCTGACATGGTATTTCTCAGGGTCCGCCGAGGCCGGATTAAA	0.000355999
na	na	ACCGGCGCCAGGCCGCCATCCGGCTTTAGCTCTGGCATGGTATTTCTCACGGTCCGCCGGGGCCGGATTAAA	0.000355999
na	na	ATCGGCGCCAGGGCGCCATCCGGCTTTAGCTCTGACATGGTATTTCTCACGGTCCGCCAGGGCCGGATTAAA	0.000355999
na	na	ATTGGCGCCAGGGCGCCACCCGGCTTTAGCTCTGACATGGTATTTCTCACGGTCCGCCGGGGCCGGATTAAA	0.000355999
na	na	ACCGGCGCCAGGGCGCCATCCGGCTTTAGCTCTGACATAGTATTTCTCACGGTCCGCCGGGGCCGGATTAAA	0.000355999
na	na	ACCGGCGCCAGGGCGCCATCCGGCTTTAGCTCTGACATGGTATTTCTCATGGTCCGCCGGGGCCGGATTAAA	0.000355999
na	na	ACTGGCGCCAGGGCGCCATCCGGCTTTAGCTCTGACATGGTATTTCTCAGGGTCCGCCGAGGCCGGATTAAA	0.000355999
na	na	ACTGGCGCCAGGGCGCCATCCGGCTTTAGCTCTGACATGGTATTTCTCACGGTCCGCCAGGGCCGGATTAAA	0.000355999
na	na	ACCGGCGCCAGGGCGCCATCCGGCTTTAGCTCTGATATGGCATTTCTCAGGGTCCGCCGGGGCCGGATTAAA	0.000355999
na	na	ATCGGCGCCAGGGCGCCATCCGGCTTTAGCTCTGATATGGTATTTCTCACGGTCCGCCGAGGCCGGATTAAA	0.000355999
na	na	ACCGGCGCCAGGGCGCCATCCGGCTTTAGCTCTGATATGGTATTTCTCACGGTCCGCCAGGGCCGGATTAAA	0.000355999
na	na	ACTGGCGCCAGGGCGCCACCCGGCTTTAGCTCTGATATGGTATTTCTCACGGTCCGCCGGGGCCGGATTAAA	0.000355999
na	na	ACCGGCGCCAGGGCGCCATCCGGCTTTAGCTCTGACATGGTACTTCTCAGGGTCCGCCGAGGCCGGATTAAA	0.000355999
na	na	ACTGGCGCCAGGCCGCCGCCCGGCTTTAGCTCTGGCATGGTACTTGTCACGGTCCGCCGGGGCCGGATTAAA	0.000350263
na	na	ACTGGCGCCAGGCCGCCACCCGGCTTAAGCTCTGACATGGTACTTGTCACGGTCCGCCAGGACCGGATTAAA	0.000350263
na	na	ACTGGCGCCAGGCCGCCACCCGGCTTAAGCTCTGACGTGGTACTTGTCACGGTCCGCCAGGGCCGGATTAAA	0.000350263
na	na	ACTGGCGCCAGGCCGCCACCCGGCTTAAGCTCTGACATAGTATTTCTCACGGTCCGCCGGGGCCGGATTAAA	0.000350263
na	na	ACTGGCGCCAGGCCGCCACCCGGCTTAAGCTCTGACATGGTATTTGTCAGGGTCCGCCGAGGCCGGATTAAA	0.000350263
na	na	ACTGGCGCCAGGCCGCCACCCGGCTTAAGCTCTGACATGGTACTTCTCACGGTCCGCCGGGGCCGGATTAAA	0.000350263
na	na	ATTGGCGCCAGACCGCCACCCGGCTTAAGCTCTGACATGGTACTTGTCACGGTCCGCCGGGGCCGGATTAAA	0.000350263
na	na	ACTGGCGCCAGGCCGCCACCCGGCTTAAGCTCTGACATGATATTTGTCACGGTCCGCCGGGGCCGGATTAAA	0.000350263
na	na	ACTGGCGCCAGGCCGCCACCCGGCTTAAGCTCTGACATGGTGTTTGTCAGGGTCCGCCGGGGCCGGATTAAA	0.000350263
na	na	ATTGGCGCCAGGCCGCCACCCGGCTTAAGCTCTGACATGGTATCTGTCACGGTCCGCCGGGGCCGGATTAAA	0.000350263
na	na	ACTGGCGCCAGGCCGCCACCCGGCTTAAGCTCTGACATGGCATTTGTCAGGGTCCGCCAGGACCGGATTAAA	0.000350263
na	na	ATTGGCGCCAGGCCGCCACCCGGCTTAAGCTCTGACATGGTATTTGTCACGGTCCGCCGAGGCCGGATTAAA	0.000350263
na	na	ATTGGCGCCAGGCCGCCACCCGGCTTAAGCTCTGACATGGCATTTGTCAGGGTCCGCCGGGGCCGGATTAAA	0.000350263
na	na	ACTGGCGCCAGGCCGCCACCCGGCTTAAGCTCTGACATGGTATTTGTCAGGATCCGCCGGGGCCGGATTAAA	0.000350263
na	na	ACTGGCGCCAGGCCGCCACCCGGCTTAAGCTCTGACATGGTATTTGTCACGGTCCGCCGGGACCGGATTAAA	0.000350263
na	na	ACTGGCGCCAGGCCGCCACCCGGCTTAAGCTCTGACATGGTGTTTGTCACGGTCCGCCAGGGCCGGATTAAA	0.000350263
na	na	ACTGGCGCCAGGCCGCCACCCGGCTTTAGCTCTGGCATGGTACTTGTCAGGGTCCGCCGAGACCGGATTAAA	0.000350263
na	na	ACTGGCGCCAGGCCGCCACCCGGCTTTAGCTCTGGCATGGCATTTGTCAGGGTCCGCCGGGGCCGGATTAAA	0.000350263
na	na	ACTGGCGCCAGGCCGCCACCCGGCTTAAGCTCTGGCGTGGTATTTCTCACGGTCCGCCGGGGCCGGATTAAA	0.000350263
na	na	ACTGGCGCCAGGCCGCCACCCGGCTTAAGCTCTGGCGTGGTACTTGTCAGGGTCCGCCGGGGCCGGATTAAA	0.000350263
na	na	ATTGGCGCCAGGCCGCCACCCGGCTTAAGCTCTGGCATGGCATTTGTCAGGATCCGCCAGGACCGGATTAAA	0.000350263
na	na	ATTGGCGCCAGGCCGCCACCCGGCTTAAGCTCTGACATGGTATTTGTCACGGTCCGCCAGGACCGGATTAAA	0.000350263
na	na	ACTGGCGCCAGGCCGCCATCCGGCTTAAGCTCTGACATGGTATTTGTCACGGTCCGCCGGGGCCGGATTAAA	0.000350263
na	na	ATTGGCGCCAGGCCGCCACCCGGCTTTAGCTCTGACATGGCATTTGTCACGGTCCGCCGGGGCCGGATTAAA	0.000350263
na	na	ACTGGCGCCAGGCCGCCACCCGGCTTAAGCTCTGACGTGGCATTCGTCACGGTCCGCCGGGGCCGGATTAAA	0.000350263
na	na	ACTGGCGCCAGGCCGCCACCCGGCTTGAGCTCTGGCATGGTACTTGTCACGGTCCGCCGGGGCCGGATTAAA	0.000350263
na	na	ACTGGCGCCAGGCCGCCACCCGGCTTAAGCTCTGGCATGGCATTTGTCAGGGTCCGCCGAGGCCGGATTAAA	0.000350263
na	na	ACTGGCGCCAGGCCGCCACCCGGCTTAAGCTCTGACGTGGTATTTCTCACGGTCCGCCAGGGCCGGATTAAA	0.000350263
na	na	ACTGGCGCCAGGCCGCCACCCGGCTTAAGCTCTGGCGTGGTATTTGTCACGGTCCGCCAGGGCCGGATTAAA	0.000350263
na	na	ATTGGCGCCAGGCCGCCACCCGGCTTTAGCTCTGACATAGTATTTGTCACGGTCCGCCGGGGCCGGATTAAA	0.000350263
na	na	ATTGGCGCCAGGCCGCCACCCGGCTTAAGCTCTGACATAGTACTTGTCACGGTCCGCCGGGGCCGGATTAAA	0.000350263
na	na	ACTGGCGCCAGGCCGCCACCCGGCTTGAGCTCTGACATGGCATTTGTCACGGTCCGCCGGGGCCGGATTAAA	0.000350263
na	na	ACTGGCGCCAGGCCGCCACCCGGCTTAAGCTCTGGCATGGCACTTGTCACGGTCCGCCAGGGCCGGATTAAA	0.000350263
na	na	ACTGGCGCCAGGCCGCCACCCGGCTTAAGCTCTGACATAGCATTTGTCACGGTCCGCCAGGGCCGGATTAAA	0.000350263
na	na	ACTGGCGCCAGGCCGCCACCCGGCTTTAGCTCTGACATGGTATTTGTCAGGGTCCGCCAGGGCCGGATTAAA	0.000350263
na	na	ACTGGCGCCAGGCCGCCACCCGGCTTAAGCTCTGACATGGTATTTGTCATGGTCCGCCGGGGCCGGATTAAA	0.000350263
na	na	ATTGACGCCAGGCCGCCGCCTGGCGTAGGCTCTGGCGTGGCACTCGTCACGGTCCGCCGGGGCCGGATTAAA	0.00034827
na	na	ATTGGCGCCAGGCCGCCGCCTGGCGTAGGCTCTGGCGTGGCACTCGTCACGGTCCGCCGAGGCCGGATTAAA	0.00034827
na	na	ATTGGCGCCAGGCCGCCGCCTGGCGTTGGCTCTGGCGTGGCACTCGTTACGGTCCGCCGGGGCCGGATTAAA	0.00034827
na	na	ATTGGCGCCAGGCCGCCGCCTGGCGTAGGCTCTGGCGTGACACTCGTCACGGTCCGCCGGGGCCGGATTAAA	0.00034827
na	na	GTTGGCGCCAAGCCGCCGCTTGGGGTAAGCTCTGGCGTGGTACTCGTCACGATCCGCCGAGGCCGGATTAAA	0.000343918
na	na	GTTGGCGCCAAGCCGCCGCTTGGCGTAAGCTCTGGCGTGGTACTCGTCAGGGTCCGCCGAGGCCGGATTAAA	0.000343918
na	na	GTTGGCGCCAAGCCGCCGCTTGGCGTAAGCTCTGGCGTGGTACTCGTCAAGATCCGCCGAGGCCGGATTAAA	0.000343918
na	na	GTTGGCGCCAAGCCGCCGCTTGGCGTAGGCTCTAGCGTGGTACTCGTCTCCGTCCGACGGGGCCGGATTAAG	0.000340677
na	na	ATTGGCGCCAGGCCGCCACCCGGCTTAAGCTCCGACATAGTGTTTGTCGCGGTCCGCCGGGGCCGGATTAAA	0.000338219
na	na	ATTGGCGTCAGGCCGCCACCCGGCTTAAGCTCCGACATGGTGTTTGTCACGGTCCGCCGGGGCCGGATTAAA	0.000338219
na	na	ATTGGCGCCAGGCCGCCACCCGGCTTAAGCTCCGACATAGTATTTGTCAGGGTCCGCCGGGGCCGGATTAAA	0.000338219
na	na	ACTGGCGCCAGGCCGCCGCCCGGCTTAAGCCCTGGTGTGGTACCTGTCAAGGTCCGCCGGGGCCGGATTAAA	0.000334672
na	na	ACTGGCGCCAGGCCGCCGCCCGGCTTAAGCCCTGGCGTGGTACCTGTCAGGGTCCGCCGGGGCCGGATTAAA	0.000334672
na	na	ATTGGCGCCAGGCCGCCGCCCGGCTTAAGCCCTGGTGTGGTACCTGTCAGGGTCCGCCGAGGCCGGATTAAA	0.000334672
na	na	ACTGGCGCCAGGCCGCCGCCCGGCTTAAGCTCTGGTGTGGTACCTGTCAGGATCCGCCGAGGCCGGATTAAA	0.000334672
na	na	ACTGGCGCCAGGCCGCCGCCCGGCTTAAGCCCTGGTGTGGTACTTGTCAGGATCCGCCGGGGCCGGATTAAA	0.000334672
na	na	ATTGGCGCCGGGCCGCCACCCGGCTGAAGCTCCGACATAGTGTTTGTCTGCGTCCGCCGGGGCCGGATTAAG	0.000333964
na	na	ATTGGCGCCAGGCCGCCACCCGGCTTAAGCTCCGACATGGTGTTTGTCTTCGTCCGCCGGGGCCGGATTAAG	0.000333964
na	na	ATTGGCACCAGGCCGCCGCCCTGCTTAAGCCCTGGCGTGGTACTCGTCAGGATCCGCCAGGACCGGATTAAA	0.000333741
na	na	ATTGGCACCAGGCCGCCGCCCTGCTTAAGCCCTGGCGTGGTACTCGTCAGGGTCCGCCAAGACCGGATTAAA	0.000333741
na	na	ATTGGCGCCAGGCCGCTGCCTGGCGTAAGCTCTGGCGTGGTACTCGTCACGGTCCGCCGGGGCCGGATTAAA	0.000333556
na	na	ATTGGCGCCAGGCCGCCGCCTGGCGTAGGCTCTGGCGTGGTACTCGTCATGGTCCGCCGGGGCCGGATTAAA	0.000333556
na	na	ATTGGCGCCAAGCCGCCGCCCGGCGTAGGCTCTGGCGTGGTACTCGTCACGGTCCGCCGGGGCCGGATTAAA	0.000333556
na	na	ATTGGCACCAGGCCGCCGCCTGGCGTAGGCTCTGGCGTGGTACTCGTCACGGTCCGCCGGGGCCGGATTAAA	0.000333556
na	na	ATTGGCGCCAGGCCGCCGCTTGGCGTAAGCTCTGGCGTGGTACTCGTCACGGTCCGCCGAGGCCGGATTAAA	0.000333556
na	na	GTTGGCGCCAAGCCGCCGCTTGGCGTAGGCTCTGGCGTGGTACTCGTTTCCGTCCGCCGGGGCCGGATTAAG	0.000333296
na	na	GTTGGCGCCAAGCCGCCGCTTGGCGTAGGCTCTGGCGTGGTACTTGTCTCCGTCCGCCGGGGCCGGATTAAG	0.000333296
na	na	ACTGGCGCCAGGCCGCCGCCCGGCTTAAGCTCTGGCATGGTACTTGTCACGGTCCGCCGGGGCCGGATTAAA	0.000333296
na	na	ATTGGCGCCAAGCCGCCGCCCGGCTTAAGCTCTGGCGTGGTACTTGTCACGGTCCGCCGGGGCCGGATTAAA	0.000333296
na	na	ATTGGCGCCAGGCCGCCGCCCGGCTTAAGCTCTGGCGTGGTACTTGTCACGGTCCGCCGAGGCCGGATTAAA	0.000333296
na	na	ATTGGCGCCAGGCCGCCGCCCGGCTTAGGCTCTGGCGTGGTATTTGTCACGGTCCGCCGGGGCCGGATTAAA	0.000333296
na	na	ACTGGCGCCAGGCCGCCGCCCGGCTTAAGCTCTGGCGTGGTATTTGTCACGGTCCGCCGGGGCCGGATTAAA	0.000333296
na	na	ATTGGCGCCAGGCCGCCGCCCGGCTTAAGCTCTGGCGTGATACTCGTCACGGTCCGCCAGGGCCGGATTAAA	0.000333296
na	na	ATTGGCGCCAGGCCGCCGCCCGGCTTAAGCTCTGGCATGATATTTGTCACGGTCCGCCGGGGCCGGATTAAA	0.000333296
na	na	ATTGGCGCCAGGCCGCCGCCCGGCTTAAGCTCTGGCGTGGTACTCGTCTCGGTCTGCCGGGGCCGGATTAGA	0.000333296
na	na	ATTGGCGCCAGGCCGCCGCCCGGCTTAAGCTCTGGTGTGGTACTTGTCACGGTCCGCCGAGGCCGGATTAAA	0.000333296
na	na	ATTGGCGCCAGGCCGCCGCCCGGCTTAAGCTCTGGCGTGGTACTTGTCGCGGTCTGCCGGGGCCGGATTGAA	0.000333296
na	na	ATTGGCGCCAGGCCGCCGCCCGGCTTAAGCTCTGGTGTGATACTCGTCCCGGTCCGCCGGGGCCGGATTAAA	0.000333296
na	na	ATTGGCGCCAGGCCGCCGCCCGGCTTAAGCTCTGGTGTGGTACTTGTCACGGTCCGCCAGGGCCGGATTAAA	0.000333296
na	na	ATTGGCGCCAGGCCGCCACCCGGCTTAAGCTCTGGCGTGGTACTTGTCTCGGTCTGCCGGGGCCGGATTGGA	0.000333296
na	na	ATTGGCGCCAGGCCGCCGCCCGGCTTAAGCTCTGGCGTGGTACTTGTCCCGGTCCGCCGGGGCCGGATTGGA	0.000333296
na	na	ATTGGCGCCAGGCCGCCACCCGGCTTAAGCTCTGGTGTGGTACTTGTCACGGTCCGCCGGGGCCGGATTGAA	0.000333296
na	na	ATTGGCGCCAGGCCGCCGCCCGGCTTAAGCTCTGGCGTGGTATTTGTCTCGGTCTGCCGGGGCCGGATTGGA	0.000333296
na	na	ATTGGCGCCAGGCCGCCGCCCGGCTTAAGCTCTGGCGTGGTACTTGTCCCGGTCCGCCGGGGCCGGATTGAA	0.000333296
na	na	GTTGGCGCCAGGCCGCCGCCCGGCTTAAGCTCTGGCGTGGTACTTGTCACGGTCCGCCGGGGCCGGATTAAA	0.000333296
na	na	ATTGGCGCCAGGCCGCCGCCCGGCTTAAGCTCTGGTGTGATACTTGTCACGGTCTGCCGGGACCGGATTAGA	0.000333296
na	na	ATTGGCGCCAGGCCGCCGCCCGGCTTAAGCTCTGGTGTGATACTTGTCGCGGTCTGCCGGGGCCGGATTAAA	0.000333296
na	na	ATTGGCGCCAGGCCGCCGCCCGGCTTAAGCTCTGGCGTGATGTTTGTCTCGGTCCGCCGGGGCCGGATTAAA	0.000333296
na	na	ATTGGCGCCAGGCCGCCGCCCGGCTTAAGCTCTGGTGTGGTATTTGTCTCGGTCTGCCGGGGCCGGATTGAA	0.000333296
na	na	ATTGGCGCCAGGCCGCCGCCCGGCTTAAGCTCTGGCGTGATATTCGTCTCGGTCCGCCGGGGCCGGATTAGA	0.000333296
na	na	ATTGGCGCCAGGCCGCCGCCCGGCTTAAGCTCTGGTGTGATACTTGTCTCGGTCTGCCGGGGCCAGATTGGA	0.000333296
na	na	ATTGGCGCCAGGCCGCCGCCCGGCTTAAGCTCTGGTGTGGTATTTGTCTCGGTCCGCCGGGGCCGGATTAGA	0.000333296
na	na	ATTGGCGCCAGGCCGCCGCCCGGCTTAAGCTCTGGCGTGATATTCGTCACGGTCCGCCGGGGCCGGATTGGA	0.000333296
na	na	ATTGGCGCCAGGCCGCCGCCCGGCTTAAGCTCTGGCGTGGTACTTGTCATGGTCCGCCGGGGCCGGATTAAA	0.000333296
na	na	ATTGGCGCCAGGCCGCCACCCGGCTTAAGCTCTGGCGTGGTACTTGTCGCGGTCCGCCGGGGCCGGATTAAA	0.000333296
na	na	ATTGGCGCCAGGCCGCCGCCCGGCTTAAGCTCTGGCATGATACTTGTCACGGTCCGCCGGGGCCGGATTAAA	0.000333296
na	na	ATTGGCGCCAGGCCGCCGCCCGGCTTAAGCTCTGGTGTGATACTCGTCGCGGTCTGCCGGGGCCGGATTAGA	0.000333296
na	na	ATTGGCGCCAGGCCGCCACCCGGCTTAAGCTCTGGTGTGGTACTTGTCTCGGTCTGCCGGGGCCGGATTGAA	0.000333296
na	na	ATTGGCGCCAGGCCGCCGCCCGGCTTAAGCTCTGGTGTGGTACTCGTCTCGGTCCGCCGGGGCCGGATTGAA	0.000333296
na	na	ATTGGCGCCAGGCCGCCGCCCGGCTTAAGCTCTGACGTGGTACTTGTCACGGTCTGCCGGGGCCGGATTGAA	0.000333296
na	na	ATTGGCGCCAGGCCGCCGCCCGGCTTAGGCTCTGGCGTGATACTCGTCACGGTCCGCCGGGGCCGGATTAAA	0.000333296
na	na	ATTGGCGCCAGGCCGCCACCCGGCTTAAGCTCTGGTGTGGTACTTGTCTCGGTCCGCCGGGGCCGGATTGGA	0.000333296
na	na	ATTGGCGCCAGGCCGCCACCCGGCTTAAGCTCTGGCGTGATATTTGTCACGGTCCGCCGGGGCCGGATTGAA	0.000333296
na	na	ATTGGCGCCAGGCCGCCACCCGGCTTAAGCTCTGGTGTGATACTTGTCTCGGTCCGCCGGGGCCGGATTAAA	0.000333296
na	na	ATTGGCGCCAGGCCGCCGCCCGGCTTAAGCTCTGGTGTGGTATTTGTCATGGTCCGCCGGGGCCGGATTAAA	0.000333296
na	na	ATTGGCGCCAGGCCGCCGCCCGGCTTAAGCTCTGGTGTGATATTCGTCTCGGTCTGCCGGGGCCGGATTAGA	0.000333296
na	na	ATTGGCGCCAGGCCGCCACCCGGCTTAAGCTCTGGTGTGGTACTTGTCTCGGTCCGCCGGGGCCGGATTGAA	0.000333296
na	na	ATTGGCGCCAGGCCGCCGCCCGGCTTAAGCTCTGGCGTGATATTTGTCTCGGTCTGCCGGGGCCGGATTAGA	0.000333296
na	na	ATTGGCGCCAGGCCGCCACCCGGCTTAAGCTCTGGTGTGATATTTGTCTCGGTCCGCCGGGGCCGGATTAAA	0.000333296
na	na	ATTGGCGCCAGGCCGCCACCCGGCTTAAGCTCTGACGTGGTACTTGTCACGGTCTGCCGGGGCCGGATTAAA	0.000333296
na	na	ATTGGCGCCAGGCCGCCGCCCGGCTTAAGCTCTGGTGTGATACTTGTCGCGGTCCGCCGGGGCCGGATTGAA	0.000333296
na	na	ATTGGCGCCAGGCCGCCGCCCGGCTTAAGCTCTGGTGTGATACTCGTCTCGGTCTGCCGGGGCCGGATTAAA	0.000333296
na	na	ATTGGCGCCAGGCCGCCGCCCGGCTTAAGCTCTGGTGTGGTATTTGTCACGGTCTGCCGGGGCCGGATTGGA	0.000333296
na	na	ATTGGCGCCAGGCCGCCGCCCGGCTTAAGCTCTGGTGTGATACTTGTCGCGGTCTGCCGGGGCCGGATTGAA	0.000333296
na	na	ATTGGCGCCAGGCCGCCACCCGGCTTAAGCTCTGGCGTGGTATTTGTCTCGGTCTGCCGGGGCCGGATTGGA	0.000333296
na	na	ATTGGCGCCAGGCCGCCGCCCGGCTTGAGCTCTGGTGTGGTACTCGTCACGGTCCGCCGGGGCCGGATTAAA	0.000333296
na	na	ATTGGCGCCAGGCCGCCGCCCGGCTTAAGCTCTGGTGTGGTATTTGTCTCGGTCCGCCGGGGCCGGATTGGA	0.000333296
na	na	ATTGGCGCCAGGCCGCCACCCGGCTTAAGCTCTGGCGTGGTACTTGTCTCGGTCTGCCGGGGCCGGATTAAA	0.000333296
na	na	ATTGGCGCCAGGCCGCCGCCCGGCTTAAGCTCTGGCGTGGTACTTGTCACGGTCCGCCGAGGCCGGATTGAA	0.000333296
na	na	ATTGGCGCCAGGCCGCCGCCCGGCTTAAGCTCTGGCGTGGTATTTGTCTCGGTCTGCCGGGGCCGGATTAGA	0.000333296
na	na	ATTGGCGCCAGGCCGCCGCCCGGCTTAAGCTCTGGCGTGGTACTTGTCGCGGTCTGCCGGGGCCGGATTAAA	0.000333296
na	na	ATTGGCGCCAGGCCGCCGCCCGGCTTAAGCTCTGGCGTGATATTCGTCTCGGTCTGCCGGGGCCGGATTAGA	0.000333296
na	na	ATTGGCGCCAGGCCGCCGCCCGGCTTAAGCTCTGGCGTGATATTCGTCACGGTCTGCCGGGGCCGGATTGGA	0.000333296
na	na	ATTGGCGCCAGGCCGCCACCCGGCTTAAGCTCTGGTGTGATACTTGTCACGGTCTGCCGGGGCCGGATTAGA	0.000333296
na	na	ATTGGCGCCAGGCCGCCGCCCGGCTTAAGCTCTGGCGTGGTACTTATCACGGTCCGCCGGGGCCGGATTAAA	0.000333296
na	na	ATTGGCGCCAGGCCGCCGCCCGGCTTAAGCTCTGGCGTGATATTCGTCTCGGTCTGCCGGGGCCGGATTAAA	0.000333296
na	na	ATTGGCGCCAGGCCGCCGCCCGGCTTAAGCTCTGGTGTGGTATTTGTCACGGTCTGCCGGGGCCGGATTGAA	0.000333296
na	na	ATTGGCGCCAGGCCGCCGCCCGGCTTAAGCTCTGGCGTGGTACTCGTCCCGGTCCGCCGGGGCCGGATTAAA	0.000333296
na	na	ATTGGCGCCAGGCCGCCACCCGGCTTAAGCTCTGGTGTGGTATTTGTCTCGGTCCGCCGGGGCCGGATTAGA	0.000333296
na	na	ATTGGCGCCAGGCCGCCACCCGGCTTAAGCTCTGGCGTGATACTTGTCACGGTCTGCCGGGGCCGGATTAAA	0.000333296
na	na	ATTGGCGCCAGGCCGCCGCCCGGCTTAAGCTCTGGCGTGATACTTGTCGCGGTCTGCCGGGGCCGGATTGGA	0.000333296
na	na	ATTGGCGCCAGGCCGCCGCCCGGCTTAAGCTCTGGCGTGATATTCGTCTCGGTCTGCCGGGGCCGGATTGGA	0.000333296
na	na	ATTGGCGCCAGGCCGCCGCCCGGCTTAAGCTCTGGCGTGGTATTTGTCTCGGTCCGCCAGGGCCGGATTAAA	0.000333296
na	na	ATTGGCGCCAGGCCGCCGCCCGGCTTAAGCTCTGGTGTGATATTCGTCACGGTCCGCCGGGGCCGGATTGAA	0.000333296
na	na	ATTGGCGCCAGGCCGCCACCCGGCTTAAGCTCTGGCGTGATACTTGTCTCGGTCCGCCGGGGCCGGATTAAA	0.000333296
na	na	ATTGGCGCCAGGCCGCCGCCCGGCTTAAGCTCTGGTGTGGTACTTGTCACGGTCCGCCGGGACCGGATTAAA	0.000333296
na	na	ATTGGCGCCAGGCCGCCGCCCGGCTTAAGCTCTGGCGTGATGTTCGTCACGGTCTGCCGGGGCCGGATTAGA	0.000333296
na	na	ATTGGCGCCAGGCCGCCGCCCGGCTTAAGCTCTGGCGTGATATTCGTCTCGGTCCGCCGGGGCCGGATTGAA	0.000333296
na	na	ATTGGCGCCAGGCCGCCGCCCGGCTTAAGCTCTGGTGTGATATTCGTCACGGTCTGCCGGGGCCGGATTGAA	0.000333296
na	na	ATTGGCGCCAGGCCGCCACCCGGCTTAAGCTCTGGCGTGATATTTGTCACGGTCTGCCGGGGCCGGATTAAA	0.000333296
na	na	ATTGGCGCCAGGCCGCCGCCCGGCTTAAGCTCTGGTGTGGTACTCGTCGCGGTCCGCCGGGGCCGGATTAAA	0.000333296
na	na	ATTGGCGCCAGGCCGCCGCCCGGCTTAAGCTCTGGTGTGGTACTTGTCCCGGTCCGCCGGGGCCGGATTAAA	0.000333296
na	na	ATTGGCGCCAGGCCGCCACCCGGCTTAAGCTCTGGCGTGATATTTGTCTCGGTCCGCCGGGGCCGGATTAGA	0.000333296
na	na	ATTGGCGCCAGGCCGCCACCCGGCTTAAGCTCTGGTGTGATACTTGTCTCGGTCTGCCGGGGCCGGATTGGA	0.000333296
na	na	ATTGGCGCCAGGCCGCCGCCCGGCTTAAGCTCTGGTATGGTATTTGTCACGGTCCGCCGGGGCCGGATTAAA	0.000333296
na	na	ATTAGCACCAGGCCGCCGCCCTGCTTAAGCCCTGGCGTGGTACTCGTCAGGGTCCGCCGAGGCCGGATTAAA	0.00032
na	na	ATTGGCGCCAGGCCGCCGCCCGGCTTAAGCCCTGGCGTGGTACTCGTCAGGGTCCGCCGAGGCCGGATTAAA	0.00032
na	na	ATTGGCACCAGGCCGCCGCCCGGCTTAAGCCCTGGCGTGGTACTCGTCAGGATCCGCCGGGGCCGGATTAAA	0.00032
na	na	ATTGGCGCCAGGCCGCCGCCCGGCTTAAGCCCTGGCGTGGTATTCGTCACGGTCCGCCAGGGCCGGATTAAA	0.000312793
na	na	ATTGGCGCCAGGCCGCCGCCCGGCTTAAGCTCTGGCATGGTACTCGTCACGGTCCGCCAGGGCCGGATTAAA	0.000312793
na	na	ATTGGCGCCAGGCCGCCGCCCGGCTTAAGCTCTGGCGTGATACTCGTCACGGTCTGCCGGGACCGGATTAAA	0.000312793
na	na	ATTGGCGCCAAGCCGCCGCCCGGCTTAAGCTCTGGCGTGGTATTCGTCACGGTCCGCCGGGGCCGGATTAAA	0.000312793
na	na	ATTGGCGCCAGGCCGCCACCCGGCTTAAGCTCTGGCGTGATATTCGTCACGGTCCGCCGGGGCCGGATTAAA	0.000312793
na	na	ATTGGCGCCAGGCCGCCGCCCGGCTTAAGCTCTGGCGTGGTATTCGTCACGGTCCGCCGGGGCCGGGTTAAA	0.000312793
na	na	ATTGGCGCCAGGCCGCCGCCCGGCTTAAGCTCTGGCGTAGTATTCGTCACGGTCCGCCGGGGCCGGATTAAA	0.000312793
na	na	ATTGGCGCCAGGCCGCCGCCCGGCTTAAGCTCTGGCGTGGTATTCGTCACGATCCGCCGGGGCCGGATTAAA	0.000312793
na	na	ATTGGCGCCAGGCCGCCGCCCGGCTTAAGCTCTGGCGTGGTATTCGTCACGGTCCGCCGGGGCCGAATTAAA	0.000312793
na	na	ATTGGCGCCAGGCCGCCGCCCGGCTTAAGCTCTGGCGTGGTATTCGTCACAGTCCGCCGGGGCCGGATTAAA	0.000312793
na	na	ATTGGCGCCAGGCCGCCGCCCGGCTTAAGCTCTGGCGTGGTACTCGTCACGGTTCGCCGGGGCCGGATTAAA	0.000312793
na	na	ATTGGCGCCAGGCCGCCACCCGGCTTAAGCTCTGGCGTGGTATTCGTCACGGTCCGCCAGGGCCGGATTAAA	0.000312793
na	na	ATTGGCGCCAGGCCGCCGCCCGGCTTAAGCTCTGGCGTGGTATTCGTCACGGTTCGCCGGGGCCGGATTAAA	0.000312793
na	na	ATTGGCGCCAGGCCGCCGCCCAGCTTAAGCTCTGGCGTGATATTCGTCACGGTCCGCCGGGGCCGGATTAAA	0.000312793
na	na	ATTGGCGCCAGGCCGCCGCCCGGCTTAAGCTCTGGCGTGGTATTCGTCACGGTCCGCCAGGACCGGATTAAA	0.000312793
na	na	ATTGGCGCCAGGCCGCCGCCCGGCTTAAGCTCTGGCGTGGTACTCGTCACGGTCCGCCAGGACCGGATTAAA	0.000312793
na	na	ATTGGCGCCAGGCCGCCACCTGGCTTAAGCTCTGGCGTGGTACTCGTCACGGTCCGCCGGGGCCGGATTAAA	0.000312793
na	na	ACTGGCGCCAGGCCGCCACCCGGCTTTAGCTCTGACATGGTATTTCTCATGGTCCGCCGGGGCCGGATTAAA	0.000284738
na	na	ATCGGCGCCAGGCCGCCACCCGGCTTTAGCTCTGACATGGTATTTCTCAGGGTCCGCCGGGGCCGGATTAAA	0.000284738
na	na	ATTGGCGCCAGGCCGCCACCCGGCTTAAGCTCTGACATGGTATTTCTCAGGGTCCGCCAGGACCGGATTAAA	0.000284738
na	na	ACTGGCGCCAGGCCGCCACCCGGCTTTAGCTCTGGCATGGCATTTCTCAGGATCCGCCGAGGCCGGATTAAA	0.000284738
na	na	ATTGGCGCCAGGCCGCCACCCGGCTTTGGCTCTGACATGGCATTTCTCACGGTCCGCCGGGGCCGGATTAAA	0.000284738
na	na	ACTGGCGCCAGACCGCCACCCGGCTTTAGCTCTGACATGGTATTTCTCAGGGTCCGCCGGGGCCGGATTAAA	0.000284738
na	na	ATTGGCGCCAGGGCGCCACCCGGCTTTAGCTCTGACATGGTATTTCTCAGGGTCCGCCGGGGCCGGATTAAA	0.000284738
na	na	ACTGGCGCCAGGCCGCCACCCGGCTTTAGCTCTGACATGGTATTTCTCAGGGTCCGCCGAGACCGGATTAAA	0.000284738
na	na	ACTGGCGCCAGGTCGCCACCCGGCTTTAGCTCTGACATGGTATTTCTCACGGTCCGCCGGGGCCGGATTAAA	0.000284738
na	na	ACTGGCGCCAGGGCGCCACCCGGCTTTAGCTCTGACATGGTATTTCTCAGGGTCCGCCAGGGCCGGATTAAA	0.000284738
na	na	ACTGGCGCCAGGCCGCCACCCGGCTTTAGCTCTGGCATGGCATTTCTCAGGGTCCGCCAGGGCCGGATTAAA	0.000284738
na	na	ATTGGCGCCAGGCCGCCACCCGGCTTTAGCTCTGACATGGTATTTGTCAGGGTCCGCCAGGGCCGGATTAAA	0.000284738
na	na	ACTGGCGCCAGGCCGCCACCCGGCTTTAGCTCTGACATGGTATTTCTCAGGGTCCGCCGGGGCCGAATTAAA	0.000284738
na	na	ATTGGCGCCAGGCCGCCACCCGGCTTTAGCTCTGACATGGTATTTCTCAGGGTCCGCCAAGGCCGGATTAAA	0.000284738
na	na	ATTGGCGCCAGGCCGCCATCCGGCTTTAGCTCTGACATGGTATTTCTCAGGGTCCGCCAGGGCCGGATTAAA	0.000284738
na	na	ACTGGCGCCAGGCCGCCACCCGGCTTTAGCTCTGGCATGGTATTTCTCACGGTCCGCCAGGGCCGGATTAAA	0.000284738
na	na	ATTGGCGCCAGGCCGCCACCCGGCTTTAGCTCTGGCATGGTATTTCTCACGGTCCGCCGAGGCCGGATTAAA	0.000284738
na	na	ATTGGCGCCAGGCCGCCACCCGGCTTTAGCTCTGGCATGGTATTTCTCAGGGTCCGCCAAGACCGGATTAAA	0.000284738
na	na	ATCGGCGCCAGGCCGCCACCCGGCTTTAGCTCTGACATGGTATTTCTCACGGTCCGCCGGGGCCGGATTAAA	0.000284738
na	na	ATTGGCGCCAGGCCGCCACCCGGCTTTAGCTCTGAGATGGTATTTCTCACGGTCCGCCGGGGCCGGATTAAA	0.000284738
na	na	ATTGGCGCCAGGCCGCCACCCGGCTTTAGCTCTGGCATGGCACTTCTCAGGGTCCGCCGAGGCCGGATTAAA	0.000284738
na	na	ACTGGCGCCAGGCCGCCACCCGGCTTTAGCTCTGGCATGGTATTTCTCAGGATCCGCCGAGGCCGGATTAAA	0.000284738
na	na	ACTGGCGCCAGGCCGCCACCCGGCTTAAGCTCTGACATGGCATTTCTCAGGGTCCGTCAGGACCGGATTAAA	0.000284738
na	na	ACTGGCGCCAGGCCGCCACCCGGCTTTAGCTCTGACATGGTACTTCTCAGGGTCCGCCGGGGCCGGATTAAA	0.000284738
na	na	ATTGGCGCCAGGCCGCCACCCGGCTTTAGCTCTGACGTGGTATTTCTCAGGGTCCGCCGGGGCCGGATTAAA	0.000284738
na	na	ACTGGCGCCAGGCCGCCACCCGGCTTTAGCTCTGGCATGGTATTTCTCAAGGTCCGCCGGGGCCGGATTAAA	0.000284738
na	na	ATTGGCGCCAGGCCGCCACCCGGCTTTAGCTCTGGCATGGTATTTCTCAGGGTCCGCCAGGGCCGGATTAAA	0.000284738
na	na	ACTGGCGCCAGGCCGCCACCCGGCTTTAGCTCTGACATGGTACTTCTCAGGGTCCGCCAAGGCCGGATTAAA	0.000284738
na	na	ATTGGCGCCAGGCCGCCACCCGGCTTTAGCTCTGGCATGGTACTTCTCAGGGTCCGCCGGGGCCGGATTAAA	0.000284738
na	na	ATTGGCGCCAGGCCGCCACCCGGCTTTAGCTCTGGCATGGTACTTCTCAGGGTCCGCCGGGACCGGATTAAA	0.000284738
na	na	ACTGGCGCCAGGCCGCCACCCGGCTTTAGCTCTGGCATGGTATTTCTCAGGGTCCGCCAGGACCGGATTAAA	0.000284738
na	na	ACTGGCGCCAGGGCGCCACCCGGCTTTAGCTCTGACATGGTATTTCTCAGGATCCGCCGGGGCCGGATTAAA	0.000284738
na	na	ACTGGCGCCAGGCCGCCATCCGGCTTTAGCTCTGACATGGTATTTGTCACGGTCCGCCGGGGCCGGATTAAA	0.000284738
na	na	ACTGGCGCCAGGCCGCCACCCGGCTTTAGCTCTGACGTGGTATTTCTCACGGTCCGCCGGGGCCGGATTAAA	0.000284738
na	na	ATTGGCGCCAGGCCGCCACCCGGCTTTAGCTCTGACATGGTATTTCTCAGGATCCGCCAGGACCGGATTAAA	0.000284738
na	na	ACTGGCGCCAGGCCGCCACCCGGCTTTAGCTCTGGCATGGTATTTCTCAGGGTCCGCCAGGGCCGGATTAAA	0.000284738
na	na	ACTGGCGCCAGGCCGCCACCCGGCTTGAGCTCTGACATGGCATTTCTCAGGGTCCGCCGGGACCGGATTAAA	0.000284738
na	na	ATTGGCGCCAGGCCGCCATCCGGCTTTAGCTCTGACATGGTATTTCTCAGGGTCCGCCGAGGCCGGATTAAA	0.000284738
na	na	ACTGGCGCCAGGCCGCCACCCGGCTTTAGCTCTGGCATGGTATTTCTCAGGATCCGCCGGGGCCGGATTAAA	0.000284738
na	na	ATTGGCGCCAGGCCGCCACCCGGCTTTAGCTCTGACATGGCATTTCTCAGGGTCCGCCAGGGCCGGATTAAA	0.000284738
na	na	ACTGGCGCCAGGCCGCCATCCGGCTTTAGCTCTGACATGGTACTTCTCACGGTCCGCCGGGGCCGGATTAAA	0.000284738
na	na	ACTGGCGCCAGGGCGCCACCCGGCTTTAGCTCTGACATGGTATTTGTCACGGTCCGCCAGGGCCGGATTAAA	0.000284738
na	na	ACTGGCGCCAGGCCGCCACCCGGCTTTAGCTCTGACATGGTACTTCTCACGGTCCGCCAGGGCCGGATTAAA	0.000284738
na	na	ACTGGCGCCAGGCCGCCACCCGGCTTCAGCTCTGACATGGTATTTCTCACGGTCCGCCGGGGCCGGATTAAA	0.000284738
na	na	ATTGGCGCCAGGCCGCCACCCGGCTTTAGCTCTGACATGGTATTTCTCAGGGTCCGCCGAGGCCGGATTAAA	0.000284738
na	na	ACTGGCGCCAGGCCGCCACCCGGCTTTAGCTCTGACATGGCGTTTCTCACGGTCCGCCGGGGCCGGATTAAA	0.000284738
na	na	ACTGGCGCCAGGCCGCCACCCGGCTTTAGCTCTGACATGGCACTTCTCACGGTCCGCCGGGGCCGGATTAAA	0.000284738
na	na	ATTGGCGCCAGGCCGCCACCCGGCTTTAGCTCTGGCATGGTATTTCTCACGGTCCGCCAGGGCCGGATTAAA	0.000284738
na	na	ACTGGCGCCAGGCCGCCACCCGGCTTTAGCTCTGGCATGGCATTTCTCAGGGTCCGCCGGGGCCGGATTAAA	0.000284738
na	na	ATTGGCGCCAGGCCGCCACCCGGCTTTAGCTCTGGCATGGTATTTCTCACGATCCGCCGGGGCCGGATTAAA	0.000284738
na	na	ACTGGCGCCAGGACGCCACCCGGCTTTAGCTCTGACATGGTATTTCTCACGGTCCGCCGGGGCCGGATTAAA	0.000284738
na	na	ATTGGCGCCAGGCCGCCACCCGGCTTTAGCTCTGACATGGTATTTGTCAGGGTCCGCCGGGACCGGATTAAA	0.000284738
na	na	ACTGGCGCCAGGCCGCCACCCGGCTTTAGCTCTGACATGGTATTTCTCAGGGTCCGCCGGGGCCAGATTAAA	0.000284738
na	na	ACTGGCGCCAGGCCGCCACCCGGCTTAAGCTCTGACATGGCATTTCTCAGGGTCCGCCGAGGCCGGATTAAA	0.000284738
na	na	ACTGGCGCCAGGCCGCCACCCGGCTTTAGCTCTGACATGGTATCTCTCACGGTCCGCCGGGGCCGGATTAAA	0.000284738
na	na	ACTGGCGCCAGGCCGCCACCCGGCTTAAGCTCTGACATGGTACTTCTCAGGGTCCGCCGGGGCCGGATTAAA	0.000284738
na	na	ACCGGCGCCAGGCCGCCACCCGGCTTTAGCTCTGGCATGGTATTTCTCACGGTCCGCCGGGGCCGGATTAAA	0.000284738
na	na	ACTGGCGCCAGGCCGCCACCCGGCTTTAGCTCTGACATGGTATTTTTCACGGTCCGCCAGGGCCGGATTAAA	0.000284738
na	na	ACTGGCGCCAGGCCGCCACCCGGCTTTAGCTCTGACATGGTACTTCTCAGGATCCGCCGGGGCCGGATTAAA	0.000284738
na	na	ACTGGCGCCAGGCCGCCACCCGGCTTTAGCTCTGACATGGTATTTTTCAGGGTCCGCCAGGACCGGATTAAA	0.000284738
na	na	ACTGGCGCCAGGCCGCCACCCGGCTTAAGCTCTGACATGGCATTTCTCAGGGTCCGCCAAGACCGGATTAAA	0.000284738
na	na	ACTGGCGCCAGGCCGCCACCCGGCTTCAGCTCTGACATGGCATTTCTCAGGGTCCGCCGAGGCCGGATTAAA	0.000284738
na	na	ATTGGCGCCAGGCCGCCACCCGGCTTTAGCTCTGACATGGTATTTCTCAGGGTCCGCCAGGACCGGATTAAA	0.000284738
na	na	ACTGGCGCCAGGCCGCCACCCGGCTTAAGCTCTGACATGGTATTTCTCAGGGTCCGCCAGGGCCGGATTAAA	0.000284738
na	na	ATTGGCGCCAGGCCGCCACCCGGCTTTAGCTCTGACATGGTATTTGTCACGGTCCGCCGGGACCGGATTAAA	0.000277085
na	na	ACTGGCGCCAGGCCGCCACCCGGCTTAAGCTCTGGCATGGTATTTGTCAGGATCCGCCGAGGCCGGATTAAA	0.000277085
na	na	ATTGGCGCCAGGCCGCCACCCGGCTTAAGCTCTGGCATGGTGTTTGTCACGGTCCGCCAGGGCCGGATTAAA	0.000277085
na	na	ATTGGCGCCAGGCCACCACCCGGCTTAAGCTCTGACATGGTATTTGTCACGGTCCGCCGGGGCCGGATTAAA	0.000277085
na	na	ATTGGCGCCAGGCCGCCACCCGGCTTAAGCTCTGACATGGTGTTTGTCAGGGTCCGCCGGGGCCGGATTAAA	0.000277085
na	na	ATTGGCGCCAGGCCGCCACCCGGCTTAAGCTCTGACATGGTGTTTGTCACGGTCCGCCGGGACCGGATTAAA	0.000277085
na	na	ATTGGCACCAGGCCGCCACCCGGCTTAAGCTCTGACATGGTATTTGTCACGGTCCGCCGGGGCCGGATTAAA	0.000277085
na	na	ATTGGCGCCAGGCCGCCACCCGGCTTAAGCTCTGACATGGTATTTATCACGGTCCGCCGGGGCCGGATTAAA	0.000277085
na	na	ATTGGCGCCAGGCCGCCACCCGGCTTAAGCTCTGACGTGGTATTTGTCACGATCCGCCGGGGCCGGATTAAA	0.000277085
na	na	ATTGGCGCCAGGCCGCCACCCGGCTTAAGCTCTAACATGGTATTTGTCACGGTCCGCCGGGGCCGGATTAAA	0.000277085
na	na	ATTGGCGCCAGGCCGCCACCCGGCTTAAGCTCTGGCATGGTATTTGTCAGGGTCCGCCAGGGCCGGATTAAA	0.000277085
na	na	ACTGGCGCCAGGCCGCCACCCGGCTTAAGCTCTGACATGGTACTCGTCACGGTCCGCCGGGGCCGGATTAAA	0.000277085
na	na	ACTGGCGCTAGGCCGCCACCCGGCTTAAGCTCTGACATGGTATTTGTCACGGTCCGCCGGGGCCGGATTAAA	0.000277085
na	na	ATTGGCGCCAGGCCGCCACCCGGCTTAAGCTCTGACATGGTACTCGTCACGGTCCGCCGGGGCCGGATTAAA	0.000277085
na	na	ATTGGCGCCAGGCCGCCACCCGGCTTAAGCTCCGGCATGGTATTTGTCACGGTCCGCCAGGGCCGGATTAAA	0.000277085
na	na	ATTGGCGCCAGGCCGCCACCCGGCTTAAGCTCTGGCATGGTATTTGTCACGGTCCGCCAGGACCGGATTAAA	0.000277085
na	na	ATTGGCGCCAGGCCGCCACCCGGCTTAAGCTCTGACATGATGTTTGTCACGGTCCGCCGGGGCCGGATTAAA	0.000277085
na	na	ATTGGCGCCAGGCCGCCACCCGGCTTAAGCTCTGACATGGCATTTGTCAGGGTCCGCCAGGGCCGGATTAAA	0.000277085
na	na	ATTGGCGCCAGGCCGCCACCCGGCTTAAGCTCCGGCATGGTATTTGTCACGGTCCGCCGGGGCCGGATTAAA	0.000277085
na	na	ATTGGCGCCAGGCCGCCGCCCGGCTTAAGCCCTGGCGTGATACTCGTCACGGTCCGCCGGGGCCGGATTAAA	0.000267165
na	na	ATTGGCACCAGGCCGCCGCCCGGCTTAAGCCCTGGCGTGGTATTCGTCACGGTCCGCCGGGGCCGGATTAAA	0.000267165
na	na	ATTGGCACCAGGCCGCCGCCCGGCTTAAGCCCTGGCGTGGTACTCGTCACGGTCCGCCGAGGCCGGATTAAA	0.000267165
na	na	ATTGGCGCCAGGCCGCCACCCGGCTTAAGCCCTGGCGTGGTACTCGTCACGGTCCGCCGGGGCCGGATTAAA	0.000267165
na	na	ATTGGCGCCAGGCCGCCGCCCGGCTTAAGCCCTGGCGTGGTGCTCGTCACGGTCCGCCGGGGCCGGATTAAA	0.000267165
na	na	ATTGGCACCAGGCCGCCGCCCTGCTTAAGCCCTGGCGTGGTACTCGTCACGGTCCACCGGGGCCGGATTAAA	0.000260485
na	na	ATTGGCACCAGGCCGCCGCCCTGCTTAAGCCCTGGCGTGGTACTCGTCACGGTCCGCCGGGGCCAGATTAAA	0.000260485
na	na	ATTGGCACCGGGCCGCCGCCCTGCTTAAGCCCTGGCGTGGTACTCGTCACGGTCCGCCGGGGCCGGATTAAA	0.000260485
na	na	ATTGGCACCAGGCCGCCGCCCTGCTTAAGCCCTGGCGTGGTACTCGTCATGGTCCGCCAGGGCCGGATTAAA	0.000260485
na	na	ATTGGCACCAGGCCGCCGCCCTGCTTAAGCCCTGGCTTGGTACTCGTCACGGTCCGCCGGGGCCGGATTAAA	0.000260485
na	na	ATTGGCACCAGGCCGCCGCCCTGCTTAAGCCCTGGCATGGTACTCGTCACGGTCCGCCGGGGCCGGATTAAA	0.000260485
na	na	ATTGGCACCAGGCCGCCGCCCGGCTTAAGCCCTGGCGTGGTACTCGTCACGGTCCGTCGGGGCCGGATTAAA	0.000260485
na	na	GTTGGCGCCAAGCCGCCGCTTGGCGTAGGCTCTGGCGTGGTACTCGTCATGGTCCGCCGGGGCCGGATTAAA	0.000257268
na	na	GTTGGCGCCAAGCCGCCGCTTGGCGTAGGCTCTGGCGTGGTACTCGTCACAGTCCGCCAGGGCCGGATTAAA	0.000242718
na	na	ATTGGCGCCAGGCCGCCACCCGGCTTAAGCTCTGGCGTGATGTTCGTCACGGTTCGCCGGGGCCGGATTAAA	0.00024216
na	na	ATTGGCGCCAGGCCGCCGCCCGGCTTAAGCTCTGGCGTGATGTTCGTCACGGTCCACCAGGACCGGATTAAA	0.00024216
na	na	ATTGGCGCCAGGCCGCCGCCCGGCTTAAGCTCTGGCGTGATGTTCGTCAAGGTCCGCCAGGACCGGATTAAA	0.00024216
na	na	ATTGGCGCCAGGCCGCCGCCCGGCTTAAGCTCTGGCGTGATGTTCGTCACGGTCCGCCGGGGCCGGGTTAAA	0.00024216
na	na	ATTGGCGCCAGGCCGCCGCCCGGCTTAAGCTCTGGCGTGATGTTCGTCATGGTCCGCCAGGGCCGGATTAAA	0.00024216
na	na	ATTGGCGCCAGGCCGCCGCCTGGCTTAAGCTCTGGCGTGATGTTCGTCACGGTCCGCCGGGGCCGGATTAAA	0.00024216
na	na	ATTGGCGCCAGGCCGCCGCCCGGCTTAAGCTCTGGCGTGGTGTTCGTCATGGTCCGCCGGGACCGGATTAAA	0.00024216
na	na	ATTGGCGCCAGGCCGCCGCCCGGCTTAAGCTCTGGCGTGATGTTCGTCACGGTTCCCCGGGACCGGATTAAA	0.00024216
na	na	ATTGGCGCCAGGCCGCCGCCCGGCTTAAGCTCTGGCGTGATGCTCGTCACGGTCCGCCGGGACCGGATTAAA	0.00024216
na	na	ATTGGCGCCAGGCCGCCGCCCGGCTTAAGCTCTGGCGTGATACTCGTCACGGTTCGCCGGGGCCGGATTAAA	0.00024216
na	na	ATTGGCGCCAGGCCGCCGCCCGGCTTAAGCTCTGGCATGATGTTCGTCACGGTCCGCCGGGGCCGGATTAAA	0.00024216
na	na	ATTGGCGCCAGGCCGCCGCCCGGCTTAAGCTCTGGCGTGATGTTCGTCATGGTTCGCCGGGGCCGGATTAAA	0.00024216
na	na	ATTGGCGCCAGGCCGCCGCCCGGCTTAAGCTCTGGCGTGATGTTCGTCACGGTCCGCCAAGGCCGGATTAAA	0.00024216
na	na	ATTGGCGCCAGGCCGCCGCCCGGCTTAAGCTCTGGCGTGGTGTTCGTCACGATCCGCCGGGGCCGGATTAAA	0.00024216
na	na	ATTGGCGCCAGGCCGCCGCCCGGCTTAAGCTCTGGCGTGATGCTCGTCACGGTTCGCCGGGGCCGGATTAAA	0.00024216
na	na	ATTGGCGCCAGGCCGCCGCCCGGCTTAAGCTCTGGCGTGATGTTCGTCACGGTTCCCCAGGGCCGGATTAAA	0.00024216
na	na	ATTGGCGCCAGGCCGCCGCCCGGCTTAAGCTCTGGCGTGGTGTTCGTCAGGGTCCGCCGGGGCCGGATTAAA	0.00024216
na	na	ATTGGCGCCAGGCCGCCGCCCGGCTTAAGCTCTGGCGTGATATTCGTCAGGGTCCGCCGGGGCCGGATTAAA	0.00024216
na	na	ATTGGCGCCAGGCCGCCACCCGGCTTAAGCTCTGGCGTGATGTTTGTCACGGTCCGCCAGGGCCGGATTAAA	0.00024216
na	na	ATTGGCACCAGGCCGCCGCCCTGCTTGAGCCCTGGCGTGGTACTCGTCACGGTCCGCCAGGGCCGGATTAAA	0.000239349
na	na	ATTGGCACCAGGCCGCCGCCCTGCTTAAGCCCTGGCGTGGTACTCGTCACGGTCCGCCAAGGCCGGATTAAA	0.000239349
na	na	ACCGGCGCCAGGGCGCCATCCGGCTTTAGCTCTGACATGGTATTTCTCATGGTCCGCCAGGGCCGGATTAAA	0.000237332
na	na	ACCGGCGCCAGGGCGCCATCCGGCTTTAGCTCTGGCATGGTATCTCTCACGGTCCGCCGGGGCCGGATTAAA	0.000237332
na	na	ACCGGCGCCAGGGCGCCATCCGGCTTTAGCTCTGACATGGCATTTCTCACGGTCCGCCGAGGCCGGATTAAA	0.000237332
na	na	ACCGGCGCCAGGGCGCCATCCGGCTTTAGCTCTGATATGGTATTTCTCATGGTCCGCCGGGGCCGGATTAAA	0.000237332
na	na	ACCGGCGCCAGGGCGCCATCCGGCTTTAGCTCTGATATGGTATTTCTCAGGGTCCGCCGGGGCCGAATTAAA	0.000237332
na	na	ACCGGCGCCAGGGCGCCATCCGGCTTTAGCTCTGGTATGGTATTTCTCAGGGTCCGCCGGGGCCGGATTAAA	0.000237332
na	na	ACCGGCGCCAGAGCGCCATCCGGCTTTAGCTCTGACATGGTATTTCTCACGGTCCGCCGGGGCCGGATTAAA	0.000237332
na	na	ACTGGCGCCAGGGCGCCATCCGGCTTTAGCTCTGACATGGCATTTCTCAGGGTCCGCCGGGGCCGGATTAAA	0.000237332
na	na	ACCGGCGCCAGGGCGCCATCCGGCTTTAGCTCTGACATGGTATCTCTCACGGTCCGCCGGGGCCGAATTAAA	0.000237332
na	na	ACCGGCGCCAGGGCGCCATCCGGCTTTAGCTCTGACATGGTATTTCTCACGGTCCGCCGGGGCCGGATTAAG	0.000237332
na	na	ACCGGCGCCAGGGCGCCATCCGGCTTAAGCTCTGACATGGTATTTCTCACGGTCCGCCGGGGCCGGATTAAA	0.000237332
na	na	ATCGGCGCCAGGGCGCCATCCGGCTTTAGCTCTGACATGGTATTTCTCAGGGTCCGCCAGGGCCGGATTAAA	0.000237332
na	na	ACCGGCGCCAGAGCGCCATCCGGCTTTAGCTCTGATATGGTATTTCTCACGGTCCGCCGGGGCCGGATTAAA	0.000237332
na	na	ACCGGCGCCAGGGCGCCATCCGGCTTTAGCTCTGACATGGTATTTCTCACGGTCCACCGGGGCCGGATTAAA	0.000237332
na	na	ACCGGCGCCAGGGCGCCATCCGGCTTTAGCTCTGACATGGTATTTCTCACGGTCCGCCGGGGTCGGATTAAA	0.000237332
na	na	ACCGGCGCCAGGCCGCCATCCGGCTTTAGCTCTGATATGGTATTTCTCAGGGTCCGCCGGGGCCGGATTAAA	0.000237332
na	na	ACCGGCGCCAGGCCGCCACCCGGCTTTAGCTCTGATATGGTATTTCTCACGGTCCGCCGGGGCCGGATTAAA	0.000237332
na	na	ACCGGCGCCAGGGCGCCATCCGGCTTTAGCTCTGGCATGGTATTTCTCACGGTCCGCCGAGGCCGGATTAAA	0.000237332
na	na	ACCGGCGCCAGGGCGCCATCCGGCTTTAGCTCTGACATGGTATTTCTCACGGTCTGCCGGGGCCGGATTAAA	0.000237332
na	na	ATCGGCGCCAGGGCGCCATCCGGCTTTAGCTCTGGCATGGTACTTCTCAGGGTCCGCCGGGGCCGGATTAAA	0.000237332
na	na	ATTGGCGCCAGGGCGCCATCCGGCTTTAGCTCTGATATGGTATTTCTCACGGTCCGCCGGGGCCGGATTAAA	0.000237332
na	na	ATCGGCGCCAGGGCGCCATCCGGCTTTAGCTCTGATATGGTATCTCTCACGGTCCGCCGGGGCCGGATTAAA	0.000237332
na	na	ACCGGCGCCAGGGCGCCATCCGGCTTTAGCTCTGACATGGTACTTCTCACGATCCGCCGGGGCCGGATTAAA	0.000237332
na	na	ACCGGCGCCAGGGCGCCATCCGGCTTTAGCTCTGATATGATATTTCTCACGGTCCGCCGGGGCCGGATTAAA	0.000237332
na	na	ACCGGCGCCAGGCCGCCATCCGGCTTTAGCTCTGACATGGTATTTCTCACGGTCCGCCGAGGCCGGATTAAA	0.000237332
na	na	ACCGGCGCCAGGGCGCCATCCGGCTTTAGCTCTGGCATGGTATTTCTCAGGATCCGCCGGGGCCGGATTAAA	0.000237332
na	na	ATCGGCGCCAGGGCGCCATCCGGCTTTAGCTCTGGTATGGTATTTCTCACGGTCCGCCGGGGCCGGATTAAA	0.000237332
na	na	ACCGGCGCCAGGGCGCCATCCGGCTTTAGCTCTGGCATGGTATTTCTCACGATCCGCCGGGGCCGGATTAAA	0.000237332
na	na	ATCGGCGCCAGGGCGCCATCCGGCTTTAGCTCTGACATGGCATTTCTCACGGTCCGCCGGGGCCGGATTAAA	0.000237332
na	na	ACCGGCGCCAGGGCGCCATCCAGCTTTAGCTCTGACATGGTATTTCTCACGGTCCGCCGGGGCCGGATTAAA	0.000237332
na	na	ACCGGCGCCAGGGCGCCATCCGGCTTTAGCTCTGACATGGTATCTCTCAGGGTCCGCCGGGGCCGGATTAAA	0.000237332
na	na	ACCGGCGCCAGGGCGCCATCCGGCTTTAGCTCTGACATGATATTTCTCACGGTCCGCCGGGGCCGGATTAAA	0.000237332
na	na	ACCGGCGCCAGGGCGCCACCCGGCTTTAGCTCTGACATGGTATTTCTCAGGATCCGCCGGGGCCGGATTAAA	0.000237332
na	na	ACCGGCGCCAGGGCGCCACCCGGCTTTAGCTCTGATATGGTATTTCTCAGGGTCCGCCGGGGCCGGATTAAA	0.000237332
na	na	ACCGGCGCCAGGGCGCCATCCGGCTTTAGCTCTGATATGGTATTTCTCAGGGTCCGCCAGGGCCGGATTAAA	0.000237332
na	na	ACCGGCGCCAGGGCGCCATCCGGCTTTAGCTCTGACATGGTATTTCTCACGGTCCGCCGAGGCCGAATTAAA	0.000237332
na	na	ACCGGCGCCAGGGCGCCACCCGGCTTTAGCTCTGACATGGTATTTCTCAGGGTCCGCCAGGGCCGGATTAAA	0.000237332
na	na	ACTGGCGCCAGGGCGCCACCCGGCTTTAGCTCTGACATGGTATTTCTCACGGTCCGCCGAGGCCGGATTAAA	0.000237332
na	na	ACCGGCGCCAGGGTGCCATCCGGCTTTAGCTCTGACATGGTATTTCTCACGGTCCGCCGGGGCCGGATTAAA	0.000237332
na	na	ACCGGCGCCAGGGCGCCACCCGGCTTTAGCTCTGACATGGTATCTCTCAGGGTCCGCCGGGGCCGGATTAAA	0.000237332
na	na	ACCGGCGCCAGGGCGCCATCCGGCTTTAGCTCTGATATGGTATTTCTCACAGTCCGCCGGGGCCGGATTAAA	0.000237332
na	na	ATTGTCGCCAGGCCGCCGCCTGGCGTAGGCTCTGGCGTGGCACTCGTTACGGTCCGCCGGGGCCGGATTAAA	0.00023218
na	na	ATTGGCGCCAGGCCGCCGCCTGGCGTAGGCTCTGGCGTGGCACTCGTCACGGTCCGCCGGGACCGGATTAAA	0.00023218
na	na	ATTGGCGCCAGGCCGCCGCCTGGCGTAGGCTCTGGCGTGGCACTCGTCACGATCCGCCGGGGCCGGATTAAA	0.00023218
na	na	ATTGTCGCCAGGCCGCCGCCTGGCGTAGGCTCTGGCGTGGTACTCGTCACGGTCCGCCGGGGCCGGATTAAA	0.00023218
na	na	ATTGGCGTCAGGCCGCCGCCTGGCGTAGGCTCTGGCGTGGCACTCGTCACGGTCCGCCGGGGCCGGATTAAA	0.00023218
na	na	ATTGGCGCCAGGCCGCCGCCCGGCTTAAGCTCTGGCGTGGTACTCGTCAGGGTCCGCCGGGGCCGGATTAAA	0.000231857
na	na	ATTGGCGCCAGGCCGCCGCCCGGCTTAAGCTCTGGTATGGTACTCGTCACGGTCCGCCGGGGCCGGATTAAA	0.000231857
na	na	ATTGGCGCCAGGCCGCCGCCCCGCTTAAGCTCTGGCGTGGTACTCGTCACGGTCCGCCGGGGCCGGATTAAA	0.000231857
na	na	ATTGGCGCCAGGCCGCCGCCCGGCTTAGGCTCTGGCGTGGCACTCGTCACGGTCCGCCGGGGCCGGATTAAA	0.000231857
na	na	ATTGGCGCCAGGCCGCCGCCCGGCTTAAGCTCTGATGTGGTACTCGTCACGGTCCGCCGGGGCCGGATTAAA	0.000231857
na	na	ATTGGCGCCAGGCCGCCGCCCGGCGTAAGCCCTGGCGTGGTACTCGTCACGGTCCGCCGGGGCCGGATTAAA	0.000231857
na	na	ATTGGCACCAGGCCGCCGCCCGGCTTAAGCTCTGACGTGGTACTCGTCACGGTCCGCCGGGGCCGGATTAAA	0.000231857
na	na	ATTGGCACCAGGCCGCCGCCCGGCTTAAGCTCTGGTGTGGTACTCGTCACGGTCCGCCGGGGCCGGATTAAA	0.000231857
na	na	ATTGGCGCCAAGCCGCCGCCCGGCTTAAGCTCTGGCGTGGTACTCGTCACGGTCCGCCGGGGCCGAATTAAA	0.000231857
na	na	ATTGGCGCCAGGCCGCCGCCTGGCTTAAGCTCTGACGTGGTACTCGTCACGGTCCGCCGGGGCCGGATTAAA	0.000231857
na	na	ATTGGCGCCAGGCCGCCGCCCGGCTTAAGCCCTGGCGTGGTACTCGTCACGGTCTGCCGGGGCCGGATTAAA	0.000231857
na	na	ATTGGCGCCAGGCCGCCGCCCGGCTTAAGCTCTGACATGGTACTCGTCACGGTCCGCCGGGGCCGGATTAAA	0.000231857
na	na	GTTGGCGCCAGGCCGCCGCCCGGCTTAAGCTCTGGCGTGGTACTCGTCACGGTCCGCCGGGGCCGGATTAAA	0.000231857
na	na	ATTGGCGCCAGGCCGCCGCCCGGCTTAAGCTCTGGCGTGGTACTCGTCACGGTCCACCGGGGCCGGATTAAA	0.000231857
na	na	ATTGGCGCCAGGCCGCCGCCCGGCTTGAGCTCTGGCGTGGTACTCGTCACGGTCCGCCGGGGCCGGATTAAA	0.000231857
na	na	ATTGGCGCCAGGCCGCCGCCCGGCTTAAGCTCTGGCGTGGTACTCGTCACAGTCCGCCGGGGCCGGATTAAA	0.000231857
na	na	ATTGGCGCCAGGCCGCCGCCCGGCTTAAGCTCTGGTGTGGTACTCGTCACGGTCCGCCAGGGCCGGATTAAA	0.000231857
na	na	ATTGGCGCCAGGCCGCCGCCTGGCTTAAGCTCTGGCGTGATACTTGTCACGGTCCGCCGGGGCCGGATTAAA	0.000231857
na	na	ACTGGCGCCAGGCCGCCGCCCGGCTTAAGCTCTGGCGTGGTACTCGTCACGGTCCGCCGGGGCCGGATTAAA	0.000231857
na	na	ATTGGCGCCAGGCCGCCGCCCGGCTTAGGCTCTGGCGTGGTATTCGTCACGGTCCGCCGGGGCCGGATTAAA	0.000231857
na	na	ATTGGCACCAGGCCGCCGCCCGGCTTAAGCTCTGGCGTGGCACTCGTCACGGTCCGCCGGGGCCGGATTAAA	0.000231857
na	na	ATTGGCGCCAGGCCGCCGCCCGGCTTAAGCTCTGGCGTGGTACTCGTTACGGTCCGCCGGGGCCGGATTAAA	0.000231857
na	na	ATTGGCGCCAGGCCGCCGCCCGGCCTAAGCTCTGGCGTGGTACTCGTCACGGTCCGCCGGGGCCGGATTAAA	0.000231857
na	na	ATTGGCGCCAGGCCGCCGCCCGGCTTAAACTCTGGCGTGGTACTCGTCACGGTCCGCCGGGGCCGGATTAAA	0.000231857
na	na	ATTGGCGCCAGACCGCCGCCCGGCTTAAGCTCTGGCGTGGTACTCGTCACGGTCCGCCGGGGCCGGATTAAA	0.000231857
na	na	ATTGGCGCCAGGCCACCGCCCGGCTTAAGCTCTGGCGTGGTACTCGTCACGGTCCGCCGGGGCCGGATTAAA	0.000231857
na	na	GTTGGCGCCAAGCCGCCGCTTGGCGTAGGCTCTGGCGTGGTACTCGTCGCGGTCCGCCGGGGCCGGATTAAA	0.000231107
na	na	GTTGGCGCCAAGCCGCCGCCTGGCGTAAGCTCTGGCGTGGTACTCGTCACGGTCCGCCGGGGCCGGATTAAA	0.000231107
na	na	ATTGGCGCCAAGCCGCCGCTTGGCGTAAGCTCTGGCGTGGTACTCGTCACGGTCCGCCAGGGCCGGATTAAA	0.000231107
na	na	ATTGGCGCCAAGCCGCCGCTCGGCGTAGGCTCTGGCGTGGTACTCGTCACGGTCCGCCGGGGCCGGATTAAA	0.000231107
na	na	GTTGGCGCCAAGCCGCCGCTTGACGTAAGCTCTGGCGTGGTACTCGTCACGGTCCGCCGGGGCCGGATTAAA	0.000231107
na	na	GTTGGCGCCAGGCCGCCGCTTGGCGTAGGCTCTGGCGTGGTACTCGTCACGGTCCGCCGAGGCCGGATTAAA	0.000231107
na	na	GTTGGCGCCAAGCCGCCGCTTGGAGTAAGCTCTGGCGTGGTACTCGTCAGGATCCGCCGAGGCCGGATTAAA	0.000229279
na	na	ATTGGCGCCAAGCCGCCGCTTGGCGTAAGCTCTGGCGTGGTACTCGTCAGGGTCCGCCGAGGCCGGATTAAA	0.000229279
na	na	GTTGGCGCCAAGCCGCCGCTTGGCGTAAGCTCTGGCGTGGTACTCGTCAGGATCCGCCGGGGCCGGATTAAA	0.000229279
na	na	GTTGGCGCCAAGCCGCCGCTTGGCGTAAGCTCTGGCGTGGTACTCGTCACGATCCGCCAAGGCCGGATTAAA	0.000229279
na	na	GTTGGCGCCAAGCCGCCGCTTGACGTAGGCTCTGGCGTGGTACTCGTCACGATCCGCCGAGGCCGGATTAAA	0.000229279
na	na	GTTGGCGCCAAGCCGCCGCTTGGCGTAGGCTCTGGCGTGGTACTCGTCTCCGTCCGACGGGGCCGGATTAAA	0.000227118
na	na	GTTGGCGCCAAGCCGCCGCTTGGCGTAGGCTCTGGCGTGGTACTCGTCTCCGTCCGGCAGGGCCGGATTAAG	0.000227118
na	na	ACTGGCGCCAGGCCGCCACCCGGCTTAAGCTCCGACATGGTGTTTGTCACGGTCCGCCGGGGCCGGATTAAA	0.000225479
na	na	ATTGGCGCCAGGCCGCCACCCGGCTAAAGCTCCGACATAGTGTTTGTCACGGTCCGCCGGGGCCGGATTAAA	0.000225479
na	na	ATTGGCGCCAGGCCGCCACCCGGCTTAAGCTCCGACATGGTGTTTGTCTCGGTCCGCCGGGGCCGGATTAAA	0.000225479
na	na	ATTGGCGCCAGGCCGCCACCCGGCTTAAGCTCTGACATAGTGTTTGTCAGGGTCCGCCGGGGCCGGATTAAA	0.000225479
na	na	ATTGGCGCCAGGCCGCCACCCGGCTTAAGCTCCGACATAGTGCTTGTCACGGTCCGCCGGGGCCGGATTAAA	0.000225479
na	na	ATTGGCGCCAGGCCGCCACCCGGCTTAAGCTCCGACATAGTGTTTGTCACGGTCCGCCGAGGCCGGATTAAA	0.000225479
na	na	ATTGGCGCCAGGCCGCCACCCGGCTTAAGCTCTGACATAGTGTTTGTCAGGGTCCGCCAGGGCCGGATTAAA	0.000225479
na	na	ACTGGCGCCAGGCCGCCGCCCGGCTTAAGCCCTGGCGTGGTACCTGTCAGGGTCCGCCGAGGCCGGATTAAA	0.000223115
na	na	ATTGGCGCCAGGCCGCCGCCCGGCTTAAGCCCTGGTGTGGTACCTGTCAGGATCCGCCGGGGCCGGATTAAA	0.000223115
na	na	ATTGGCGCCGGGCCGCCACCCGGCTTAAGCTCCGACATGGTGTTTGTCTGCGTCCGCCGGGGCCGGATTAAG	0.000222643
na	na	ATTGGCGCCAGGCCGCCACCCGGCTTAAGCTCCGACATAGTGTTTGTCTCCGTCCGCCGAGGCCGGATTAAG	0.000222643
na	na	ATTGGCGCCAGGCCGCCACCCGGCTTAAGCTCCGACATAATGTTTGTCTCCGTCCGCCGGGGCCGGATTAAG	0.000222643
na	na	ATTGGCGCCAGGCCGCCACCCGGCTTAAGCTCCGACATGGTGTTTGTCTGCGTCCGCCGGGGCCGGATTAAA	0.000222643
na	na	ATTGGCGCCAGGCCGCCACCCGGCTTAAGCTCCGACATAGTGTTTGTCTCTGTCCGCCGGGGCCGGATTAAG	0.000222643
na	na	ATTGGCGCCAGGCCGCCACCCGGCTGAAGCTCCGACATAGTGTTTGTCTCCGTCCGCCGGGACCGGATTAAG	0.000222643
na	na	ATTGGCGCCAGGCCGCCACCCGGCTAAAGCTCCGACATAGTGTTTGTCTCCGTCCGCCGGGGCCGGATTAAG	0.000222643
na	na	ATTGGCGCCAGGCCGCCACCCGGCTTAAGCTCCGACATAGTGTTTGTCGCCGTCCGCCGGGGCCGGATTAAG	0.000222643
na	na	ATTGGCGCCAGGCCGCCACCCGGCTTAAGCTCCGACATAGTGTTTGTCCCCGTCCGCCGGGGCCGGATTAAG	0.000222643
na	na	ATTGGCGCCAGGCCGCCACCCGGCTTAAGCTCCGACATGGTGTTTGTCTACGTCCGCCGGGGCCGGATTAAG	0.000222643
na	na	ATTGGCGCCAGGCCGCCACCCGGCTGAAGCTCCGACATAGTGTTTGTCTCCGTCCGCCAGGGCCGGATTAAG	0.000222643
na	na	ATTGGCGCCAGGCCGCCGCCTGGCGTAGGCTCTGGCGTGGTGCTCGTCACGGTCCGCCGGGGCCGGATTAAA	0.00022237
na	na	ATTGGCGCCAGGCCGCCGCCTGGCGTGGGCTCTGGCGTGGTACTCGTCACGGTCCGCCGGGGCCGGATTAAA	0.00022237
na	na	ATTGGCGCCAGGCCGCCGCTTGGCGTAGGCTCTGGCGTGGTACTCGTCACGGTCCGCCAGGGCCGGATTAAA	0.00022237
na	na	ATTGGCGCCAAGCCGCCGCCTGGCGTAAGCTCTGGCGTGGTACTTGTCACGGTCCGCCGGGGCCGGATTAAA	0.00022237
na	na	ATTGGCGCCAGGCCGCCGCCTGGCGTAGGCTCTGGCATGGTACTCGTCACGGTCCGCCGGGGCCGGATTAAA	0.00022237
na	na	ATTGGCGCCAGGCCGCCGCCTGGCATAGGCTCTGGCGTGGTACTCGTCACGGTCCGCCGGGGCCGGATTAAA	0.00022237
na	na	GTTGGCGCCAAGCCGCCGCCTGGCGTAGGCTCTGGCGTGGCACTCGTCACGGTCCGCCGGGGCCGGATTAAA	0.00022237
na	na	ATTGGCGCCAAGCCGCCGCCTGGCGTAAGCTCTGGCGTGGTACTCGTCACGGTCCGCCGAGGCCGGATTAAA	0.00022237
na	na	ATTGGCGCCAGGCCGCCACCTGGCGTAGGCTCTGGCGTGGTACTCGTCACGGTCCGCCGGGGCCGGATTAAA	0.00022237
na	na	ATTGGCGCCAGGCCGCCGCCTGGCGTAGGCTCTGGCGTGGTACTCGTCACAGTCCGCCGGGGCCGGATTAAA	0.00022237
na	na	ATTGGCGCCAGGCCGCCGCCTGGCGTAGGCTCTGGCGTGGCATTCGTCACGGTCCGCCGGGGCCGGATTAAA	0.00022237
na	na	ATTGGCGCCAAGCCGCCGCCTGGCGTAGGCTCTGGCGTGGTACTCGTCACGGTCCGCCAGGGCCGGATTAAA	0.00022237
na	na	ATTGGCGCCAAGCCGCCGCCTGGCGTAGGCTCTGGCGTGGTATTCGTCACGGTCCGCCGGGGCCGGATTAAA	0.00022237
na	na	GTTGGCGCCAAGCCGCCGCTTGGCGTAGGCTCTGGCGTGGTACTCGTCTCCGTCCGTCGGGGCCGGATTAAG	0.000222198
na	na	ATTGGCGCCAAGCCGCCGCTTGGCGTAGGCTCTGGCGTGGTACTCGTCTCCGTCCGCCGGGGCCGGATTAAG	0.000222198
na	na	ATTGGCGCCAGGCCGCCACCCGGCTTAAGCTCTGACGTGATATTTGTCACGGTCCGCCGGGGCCGGATTAAA	0.000222198
na	na	ATTGGCGCCAGGCCGCCGCCCGGCTTAAGCTCTGACGTGATACTCGTCACGGTCCGCCGGGGCCGGATTAAA	0.000222198
na	na	ATTGGCGCCAGGCCGCCGCCCGGCTTAAGCTCTGACGTGGTACTTGTCACGGTCCGCCAGGGCCGGATTAAA	0.000222198
na	na	ATTGGCGCCAGGCCGCCGCCCGGCTTAAGCTCTGGCGTGGTACTTGTCACAGTCCGCCGGGGCCGGATTAAA	0.000222198
na	na	ATTGGCGCCAGGCCGCCGCCCGGCTTAAGCTCTGGCATGGTATTTGTCACGGTCTGCCGGGGCCGGATTAAA	0.000222198
na	na	ATTGGCGCCAGGCCGCCGCCCGGCTTAAGCTCTGGCGTGGTATTTGTCACGGTCCGCCGGGGCCGGGTTAAA	0.000222198
na	na	ATTGGTGCCAGGCCGCCGCCCGGCTTAAGCTCTGGCGTGGTACTTGTCACGGTCCGCCGGGGCCGGATTAAA	0.000222198
na	na	ATTGGCGCCAGGCCGCCGCCCGGCTTAAGCTCTGGCGTGATGCTTGTCACGGTCTGCCGGGGCCGGATTAAA	0.000222198
na	na	ATTGGCGCCAGGCCGCCGCCCGGCTTAAGCTCTGGTGTGGTGCTCGTCACGGTCCGCCGGGGCCGGATTAAA	0.000222198
na	na	ATTGGCGCCAGGCCGCCACCCGGCTTAAGCTCTGGCGTGGTATTTGTCACGGTCCACCGGGGCCGGATTAAA	0.000222198
na	na	ATTGGCGCCAGGCCGCCGCCCGGCTTAAGCTCTGGCATGGTATTTGTCACGGTCCGCCAGGGCCGGATTAAA	0.000222198
na	na	ATTGGCGCCAGGCCGCCGCCCGGCTTAAGCTCTGGCGTGGTATTCGTCACGGTCCACCGGGGCCGGATTAAA	0.000222198
na	na	ATTGGCGCCAGGCCGCCGCCCGGCTTAAGCCCTGGCGTGGTATTTGTCACGGTCCGCCGGGGCCGGATTAAA	0.000222198
na	na	ATTGGCGCCAGGCCGCCGCCCGGCTTAAGCTCTGACGTGGTACTTGTCACGGTCCGCCGGGGCCGGATTAGA	0.000222198
na	na	ATTGGCGCCAGGCCGCCGCCCGGCTTAAGCTCTGGCGTGATACTTGTCACGGTCCGCCAGGGCCGGATTAAA	0.000222198
na	na	ATTGGCGCCAGGCCGCCGCCCGGCTTAAGCTCTGGCGTGATACTCGTCGCGGTCTGCCGGGGCCGGATTAAA	0.000222198
na	na	ATTGGCGCCAGGCCGCCGCCCGGCTTAAGCTCTGGTGTGATGTTTGTCACGGTCCGCCGGGGCCGGATTAAA	0.000222198
na	na	ATTGGCGCCAGGCCGCCGCCCGGCTTAAGCTCTGGCGTGATACTCGTCACGGTCTGCCAGGGCCGGATTAAA	0.000222198
na	na	ACTGGCGCCAGGCCGCCGCCCGGCTTAAGCTCTGGTGTGGTACTTGTCACGGTCCGCCGGGGCCGGATTAAA	0.000222198
na	na	ATTGGCGCCAGGCCGCCGCCCGGCTTAAGCTCTGGCATGGTACTTGTCACGGTCCGCCGGGGCCGGATTGAA	0.000222198
na	na	ATTGGCGCCAGGCCGCCACCCGGCTTAAGCTCTGGTGTGATACTTGTCACGGTCTGCCGGGGCCGGATTGAA	0.000222198
na	na	ATTGGCGCCAGGCCGCCACCCGGCTTAAGCTCTGGTGTGATACTTGTCTCGGTCCGCCGGGGCCGGATTGAA	0.000222198
na	na	ATTGGCGCCAGGCCGCCGCCCGGCTCAAGCTCTGGCGTGGTATTTGTCACGGTCCGCCGGGGCCGGATTAGA	0.000222198
na	na	ATTGGCGCCAGGCCGCCGCCCGGCTTAAGCTCTGGCGTGATACTTGTCCCGGTCTGCCGGGGCCGGATTGAA	0.000222198
na	na	ATTGGCGCCAGGCCGCCGCCCGGCTTAAGCTCTGACGTGATACTTGTCTCGGTCCGCCGGGGCCGGATTAAA	0.000222198
na	na	ATTGGCGCCAGGCCGCCGCCCGGCTTAAGCTCTGGCGTGGCACTTGTCACGGTCCGCCGGGGCCGGATTAAA	0.000222198
na	na	ATTGGCGCCAGGCCGCCGCCCGGCTTAGGCTCTGGTGTGATACTTGTCTCGGTCCGCCGGGGCCGGATTAAA	0.000222198
na	na	ATTGGCGCCAGGCCGCCGCCCGGCTTAAGCTCTGGCATGGTACTTGTCACGGTCTGCCGGGGCCGGATTAAA	0.000222198
na	na	ATTGGCGCCAGGCCGCCGCCCGGCTTAAGCTCTGACGTGATACTCGTCACGGTCTGCCGGGGCCGGATTAAA	0.000222198
na	na	ATTGGCGCCAGGCCGCCGCCCGGCTTAAGCTCTGGCGTGGTACTTGTCACGGTCTGCCAGGGCCGGATTGAA	0.000222198
na	na	ATTGGCGCCAGGCCGCCGCCCGGCTTAAGCTCTGGTGTGGTATTCGTCACGGTCTGCCGGGGCCGGATTAAA	0.000222198
na	na	ATTGGCGCCAGGCCGCCGCCCGGCTTAAGCTCTGGCGTGATATTCGTCGCGGTCTGCCGGGGCCGGATTAAA	0.000222198
na	na	ATTGGCGCCAGGCCGCCGCCCGGCTTAAGCTCTGGCATGGTACTCGTCTCGGTCCGCCGGGGCCGGATTAAA	0.000222198
na	na	ATTGGCGCCAGGCCGCCACCCGGCTTAAGCTCTGGTGTGGTATTTGTCACGGTCTGCCGGGGCCGGATTGAA	0.000222198
na	na	ATTGGCGCCAGGCCGCCGCCCGGCTTAAGCTCTGGCATGGTACTTGTCACGGTCCGCCGGGGCCGGATTGGA	0.000222198
na	na	ATTGGCGCCAGGCCGCCGCCCGGCTTAAGCTCTGGCGTGATATTCGTCACGGTCTGCCGGGGCCGGATTAGA	0.000222198
na	na	ATTGGCGCCAGGCCGCCGTCCGGCTTAAGCTCTGGCGTGGTACTTGTCACGGTCCGCCGGGGCCGGATTAAA	0.000222198
na	na	ATTGGCGCCAGGCCGCCGCCCGGCTTAAGCTCTGGCGTGGTACTCGTCCCGGTCTGCCGGGGCCGGATTAAA	0.000222198
na	na	ATTGGCGCCAGGCCGCCGCCCGGCTTAAGCTCTGGCGTGGTGTTTGTCACGGTCCGCCGGGGCCGGATTAGA	0.000222198
na	na	ATTGGCGCCAGGCCGCCGCCCAGCTTAAGCTCTGGCGTGGTATTTGTCACGGTCCGCCGGGGCCGGATTAAA	0.000222198
na	na	ATTGGCGCCAGGCCGCCGCCCGGCTTAAGCTCTGGCGTGGTACTTGTCTCGGTCTGCCAGGGCCGGATTAGA	0.000222198
na	na	ATTGGCGCCAGGCCGCCGCCCGGCTTAAGCTCTGACGTGGTATTTGTCTCGGTCCGCCGGGGCCGGATTAAA	0.000222198
na	na	ATTGGCGCCAGGCCGCCACCCGGCTTAAGCTCTGGTGTGGTACTTGTCTCGGTCCGCCGGGGCCGGATTAAA	0.000222198
na	na	ATTGGCGCCAGGCCGCCGCCCGGCTTAAGCTCTGGTGTGATACTTGTCCCGGTCCGCCGGGGCCGGATTAAA	0.000222198
na	na	ATTGGCGCCAGGCCGCCACCCGGCTTAAGCTCTGGCGTGGTACTTGTCACAGTCCGCCGGGGCCGGATTAAA	0.000222198
na	na	ATTGGCGCCAGGCCGCCACCCGGCTTAAGCTCTGACGTGATACTTGTCACGGTCCGCCGGGGCCGGATTAAA	0.000222198
na	na	ATTGGCGCCAGGCCGCCACCCGGCTTAAGCTCTGGCGTGGTACTTGTCACGGTCTGCCGGGGCCGGATTAGA	0.000222198
na	na	ATTGGCGCCAGGCCGCCGCCCGGCTTAAGCTCTGGTGTGATACTTGTCACGGTCTACCGGGGCCGGATTAGA	0.000222198
na	na	ATTGGCGCCAGGCCGCCGCCCGGCTTAAGCTCTGGTGTGGTACTTGTCGCGGTCTGCCGGGGCCGGATTGGA	0.000222198
na	na	ATTGGCGCCAGGCCGCCGCCCGGCTTAAGCTCTGGCGTGATACTTGTCACGATCTGCCGGGGCCGGATTAAA	0.000222198
na	na	ATTGGCGCCAGGCCGCCGCCCGGCTTGAGCTCTGGCGTGGTACTTGTCACGGTCCGCCGGGGCCGGATTGAA	0.000222198
na	na	ATTGGCGCCAGGCCGCCACCCGGCTCAAGCTCTGGCGTGGTACTTGTCACGGTCCGCCGGGGCCGGATTAAA	0.000222198
na	na	ATTGGCGCCAGGCCGCCGCCCGGCTTAAGCTCTGGTGTGGTACTTGTCGCGGTCCGCCGGGGCCGGATTAGA	0.000222198
na	na	ATTGGCGCCAGGCCGCCACCCGGCTTAAGCTCTGGCGTGGTATTTGTCTCGGTCTGCCGGGGCCGGATTAAA	0.000222198
na	na	ATTGGCGCCAGGCCGCCGCCCGGCTTAAGCTCTGGCGTGGTATTTGTCTCGGTCCGCCGAGGCCGGATTAAA	0.000222198
na	na	ATTGGCGCCAGGCCGCCGCCCGGCTTAAGCTCTGGCGTGATACTCGTCACGGTCCGCCGAGGCCGGATTAAA	0.000222198
na	na	ATTGGCGCCAGGCCGCCGCCCGGCTTAAGCTCTGGCGTGGTATTCGTCCCGGTCCGCCGGGGCCGGATTAAA	0.000222198
na	na	ATTGGCGCCAGGCCGCTGCCCGGCTTAAGCTCTGGCGTGGTACTCGTCACGGTCCGCCGGGGCCGGATTAAA	0.000222198
na	na	ATTGGCGCCAGGCCGCCGCCCGGCTTAAGCTCTGGCGTGATACTTGTCCCGGTCCGCCGGGGCCGGATTAAA	0.000222198
na	na	ATTGGCGCCAGGCCGCCACCCGGCTTAAGCTCTGGCATGATACTTGTCACGGTCCGCCGGGGCCGGATTAAA	0.000222198
na	na	ATTGGCGCCAGGCCGCCGCCCGGCTTAAGCTCTGGTGTGATACTTGTCGCGGTCTGCCGGGGCCGGATTAGA	0.000222198
na	na	ATTGGCGCCAGGCCGCCGCCCGGCTTAAGCTCTGGTGTGATATTCGTCTCGGTCCGCCGGGGCCGGATTGGA	0.000222198
na	na	ATTGGCGCCAGGCCGCCGCCCGGCTTAAGCTCTGGTGTGATACTTGTCTCGGTCCGCCGGGGCCGGGTTGAA	0.000222198
na	na	ATTGGCGCCAGGCCGCCGCCCGGCTTAAGCTCTGGCATGGTACTTGTCTCGGTCTGCCGGGGCCGGATTGAA	0.000222198
na	na	ATTGGCGCCAGGCCGCCGCCCGGCTTAAGCTCTGGCGTGATATTTGTCACGGTCTGCCAGGGCCGGATTAAA	0.000222198
na	na	ATTGGCGCCAGGCCGCCGCCCGGCTTGAGCTCTGGCGTGATACTTGTCACGGTCTGCCGGGGCCGGATTAGA	0.000222198
na	na	ATTGGCGCCAGGCCGCCGCCCGGCTTAAGCTCTGGTGTAGTACTTGTCGCGGTCCGCCGGGGCCGGATTGAA	0.000222198
na	na	ATTGGCGCCAGGCCGCCGCCCGGCTTAAGCTCTGGCGTGGTATTTGTCGCGGTCCGCCGGGGCCGGATTGAA	0.000222198
na	na	ATTGGCGCCAGGCCGCCGCCTGGCTTAAGCTCTGGCGTGGTACTTGTCACGGTCTGCCGGGGCCGGATTGAA	0.000222198
na	na	ATTGGCGCCAGGCCGCCGCCCGGCTTAAGCTCTGGCGTGGTATTCGTCACGGTCTGCCGGGGCCGGATTAGA	0.000222198
na	na	ATTGGCGCCAGGCCGCCGCCCGGCTTAAGCTCTGGCGTGGTACCTGTCACGGTCCGCCGGGGCCGGATTAAA	0.000222198
na	na	ATTGGCGCCAGGCCGCCACCCGGCTTAAGCTCTGGCGTGGTATTTGTCTCGGTCCGCCGGGGCCGGATTAGA	0.000222198
na	na	ATTGGCGCCAGGCCGCCGCCCGGCTTAAGCTCTGGCGTGATGTTTGTCACGGTCCGCCGGGGCCGGATTAGA	0.000222198
na	na	ATTGGCGCCAGGCCGCCGCCCGGCTTAAGCTCTGGTGTGATACTTGTCACGGTCCGCCAGGGCCGGATTAAA	0.000222198
na	na	ATTGGCGCCAGGCCGCCGCCCGGCTTAAGCTCTGGCGTGGTACTCGTCACGGTCCGCCCGGGCCGGATTAAA	0.000222198
na	na	ATTGGCGCCAGGCCGCCGCCCGGCTTAAGCTCTGGCGTGGTACTCGTCACGATCTGCCGGGGCCGGATTAAA	0.000222198
na	na	ATTGGCGCCAGGCCGCCGCCCGGCTTAAGCTCTGGTGTGATATTCGTCTCGGTCCGCCGGGGCCGGATTAAA	0.000222198
na	na	ATTGGCGCCAGGCCGCCGCCCGGCTTAAGCTCTGGCGTGGTATTTGTCGCGGTCTGCCGGGGCCGGATTAAA	0.000222198
na	na	ATTGGCGCCAGGCCGCCGCCCGGCTTAAGCTCTGGCGTGGTATTTGTCACGGTCCGCCGAGGCCGGATTAAA	0.000222198
na	na	ATTAGCGCCAGGCCGCCGCCCGGCTTAAGCTCTGGCGTGGTACTTGTCTCGGTCCGCCGGGGCCGGATTAAA	0.000222198
na	na	ATTGGCGCCAGGCCGCCACCCGGCTTAAGCTCTGGTGTGATATTTGTCACGGTCTGCCGGGGCCGGATTAAA	0.000222198
na	na	ATTGGCGCCAGGCCGCCACCCGGCTTAAGCTCTGGTGTGATATTTGTCTCGGTCCGCCGGGGCCGGATTAGA	0.000222198
na	na	ATTGGCGCCAGGCCGCCGCCCAGCTTAAGCTCTGGCGTGGTACTTGTCACGGTCCGCCGGGGCCGGATTAAA	0.000222198
na	na	ATTGGCGCCAGGCCGCCGCCCGGCTTAAGCTCTGGAGTGGTATTTGTCACGGTCTGCCGGGGCCGGATTAAA	0.000222198
na	na	ATTGGCGCCAGGCCGCCGCCCGGCTTAAGCTCTGGCATGATATTTGTCTCGGTCCGCCGGGGCCGGATTAAA	0.000222198
na	na	ATTGGCGCCAGGCCGCCACCCGGCTTAAGCTCTGGCGTGGTACTTGTCACGGTCCGCCAGGGCCGGATTAGA	0.000222198
na	na	ATTGGCGCCAGGCCGCCGCCCGGCTTAAGCTCTGGCGTGATACTTGTCACGGTCCGCCGGGACCGGATTAGA	0.000222198
na	na	ATTGGCGCCAGGCCGCCACCCGGCTTAAGCTCTGGTGTGGTATTTGTCACGGTCCGCCGGGGCCGGATTAGA	0.000222198
na	na	ATTGGCGCCAGGCCGCCGCCCGGCTTAAGCTCTGGTGTGATACTTGTCTCGGTCTGCCGGGACCGGATTGGA	0.000222198
na	na	ATTGGCGCCAGGCCGCCGCCCGGCTTAAGCTCTGGCGTGATACTTGTCGCGGTCTGCCGGGGCCGGATTAGA	0.000222198
na	na	ATTGGCGCCAGGCCGCCGCCCGGCTTAAGCTCTGGCGTGGTATTTGTCGCGGTCTGCCGGGGCCGGATTAGA	0.000222198
na	na	ATTGGCACCAGGCCGCCGCCCGGCTTAAGCTCTGGCGTGGTACTTGTCACGGTCTGCCGGGGCCGGATTAGA	0.000222198
na	na	ATTGGCGCCAGGCCGCCGCCCGGCTTAAGCTCTGGTGTGGTGCTTGTCACGGTCCGCCGGGGCCGGATTAAA	0.000222198
na	na	ATTGGCGCCAGGCCGCCGCCCGGCTTAAGCTCTGGCGTGATATTTGTCACGATCCGCCAGGGCCGGATTAAA	0.000222198
na	na	ATTGGCGCCAGGCCGCCGCCCGGCTTAAGCTCTGGCGTGATACTTGTCACGGTCCGCCGAGGCCGGATTAGA	0.000222198
na	na	ATTGGCGCCAGGCCGCCGCCCGGCTTAAGCTCTGGCGTGATACTTGTCTCGGTCTGCCAGGGCCGGATTGAA	0.000222198
na	na	ATTGGCGCCAGGCCGCCGCCCGGCTTAAGCTCTGGCGTGGTACTTGTCGCGGTCCGCCGGGGCCGGATTGAA	0.000222198
na	na	ATTGGCGCCAGGCCGCCGCCCGGCTTAAGCTCTGGCATGGTACTTGTCACGGTCCGCCGGGGCCGGATTAGA	0.000222198
na	na	ATTGGCGCCAGGCCGCCGCCCGGCTTAAGCTCTGGTGTGATATTCGTCGCGGTCCGCCGGGGCCGGATTAAA	0.000222198
na	na	ATTGGCGCCAGGCCGCCACCCGGCTTAAGCTCTGGCGTGATACTTGTCCCGGTCTGCCGGGGCCGGATTAGA	0.000222198
na	na	ATTGGCGCCAGGCCGCCGCCCGGCTTAAGCTCTGGCGTGGTGTTTGTCTCGGTCCGCCGGGGCCGGATTGAA	0.000222198
na	na	ATTGGCGCCAGGTCGCCGCCCGGCTTAAGCTCTGGCGTGGTACTTGTCACGGTCCGCCGGGGCCGGATTAAA	0.000222198
na	na	ATTGGCGCCAGGCCGCCGCCCGGCTTGAGCTCTGGCGTGATACTCGTCACGGTCTGCCGGGGCCGGATTAAA	0.000222198
na	na	ATTGGCGCCAGGCCGCCGCCCGGCTTAAGCTCTGGTGTGGTATTCGTCACGGTCCGCCGGGGCCGGATTGAA	0.000222198
na	na	ATTGGCGCCAGGCCGCCGCCCGGCTTGAGCTCTGGCGTGATACTTGTCACGGTCCGCCGGGGCCGGATTGAA	0.000222198
na	na	ATTGGCGCCAGGCCGCCACCCGGCTTAAGCTCTGGTGTGGTACTCGTCACGGTCCGCCGGGGCCGGATTAAA	0.000222198
na	na	ATTGGCGCCAGGCCGCCGCCCGGCTTAAGCTCTGGCATGGTACTTGTCACGGTCCGCCGAGGCCGGATTAAA	0.000222198
na	na	ATTGGCGCCAGGCCGCCGCCCGGCTTAAGCTCTGGTGTGATATTCGTCACGGTCTGCCGGGGCCGGATTAGA	0.000222198
na	na	ATTGGCGCCAGGCCGCCGCCCGGCTTAAGCCCTGGCGTGATACTTGTCACGGTCCGCCGGGGCCGGATTGAA	0.000222198
na	na	ATTGGCGCCAGGCCGCCGCCCGGCTTAAGCTCTGGCGTGGTACTCGTCGCGGTCCGCCGGGGCCGGATTAGA	0.000222198
na	na	ATTGGCGCCAGGCCGCCGCCCGGCTTAAGCTCTGGTGTGATGCTTGTCACGGTCTGCCGGGGCCGGATTGGA	0.000222198
na	na	ATTGGCGCCAGGCCGCCGCCCGGCTTAAGCTCTGGCGTGATACTTGTCACGGTCCGCCGGAGCCGGATTAAA	0.000222198
na	na	ATTGGCGCCAGGCCGCCGCCCGGCTTAAGCTCTGGCGTGGTACTTGTCCCGGTCCGCCGGGGCCGGATTAGA	0.000222198
na	na	ATTGGCGCCAGACCGCCGCCCGGCTTAAGCTCTGGCGTGGTATTTGTCACGGTCCGCCGGGGCCGGATTAAA	0.000222198
na	na	ATTGGCGCCAGGCCGCCGCCCGGCTTAAGCTCTGGTATGGTACTTGTCGCGGTCCGCCGGGGCCGGATTAAA	0.000222198
na	na	ATTGGCGCCAGGCCGCCGCCCGGCTTAAGCTCTGGCGTGGTACTTGTTACGGTCCGCCGGGGCCGGATTAAA	0.000222198
na	na	ATTGGCGCCAGGCCGCCACCCGGCTTAAGCTCTGGCGTGGTACTTGTCTCGGTCCGCCGGGGCCGGATTGAA	0.000222198
na	na	ATTGGCGCCAGGCCGCCGCCCGGCTTAAGCTCTGGTATGGTATTTGTCTCGGTCCGCCGGGGCCGGATTAAA	0.000222198
na	na	ATTGGCGCCAGGCCGCCACCCGGCTTAAGCTCTGGCATGGTACTTGTCACGGTCCGCCGGGGCCGGATTGAA	0.000222198
na	na	ATTGGCGCCAGGCCGCCGCCCGGCTTAAGCTCTGGCGTGGTATTTGTCCCGGTCCGCCGGGGCCGGATTGAA	0.000222198
na	na	ATTGGCGCCAGGCCGCCGCCCGGCTTAAGCTCTGGCGTGATACTTGTCTCAGTCTGCCGGGGCCGGATTGGA	0.000222198
na	na	ATTGGCGCCAGGCCGCCGCCCGGCTTAAGCTCTGGTGTGATATTCGTCTCGGTCTGCCGGGGCCGGATTGAA	0.000222198
na	na	ATTGGCGCCAGGCCGCCACCCGGCTTAAGCTCTGGCGTGGTACTTGTCTCGGTCTGCCGGGGCCGGATTAGA	0.000222198
na	na	ATTGGCGCCAGGCCGCCGCCCGGCTTAGGCTCTGGCGTGGTACTTGTCTCGGTCCGCCGGGGCCGGATTAAA	0.000222198
na	na	ATTGGCGCCAGGCCGCCACCCGGCTTAAGCTCTGGCGTGGTACTTGTCACGGTCTGCCGGGGCCGGATTGGA	0.000222198
na	na	ATTGGCGCCAGGCCGCCACCCGGCTTAAGCTCTGGCGTGGTATTTGTCACGGTCCGCCAGGGCCGGATTAGA	0.000222198
na	na	ATTGGCGCCAGGCCGCCGCCCGGCTTAAGCTCTGGCGTGGTGCTTGTCACGGTCCGCCGGGGCCGGATTAGA	0.000222198
na	na	ATTGGCGCCAGGCCGCCACCCGGCTTAAGCTCTGGCGTGATATTTGTCACGGTCTGCCGGGGCCGGATTAGA	0.000222198
na	na	ATTGGCGCCAGGCCGCCGCCCGGCTTAAGCTCTGGTGTGATACTTGTCACGGTCCGCCGGGACCGGATTAAA	0.000222198
na	na	ATTGGCGCCAGGCCGCCACCCGGCTTAAGCTCTGGTGTGATACTTGTCACGGTCTGCCGGGGCCGGATTAAA	0.000222198
na	na	ATTGGCGCCAGGCCGCCGCCCGGCTTAAGCTCTGGCGTGGTACTTGTCACGGTCTGCCGAGGCCGGATTAGA	0.000222198
na	na	ATTGGCGCCAGGCCGCCGCCCGGCTTAAGCTCTGGCGTAGTACTTGTCACGGTCCGCCGGGGCCGGATTAAA	0.000222198
na	na	ACTGGCGCCAGGCCGCCGCCCGGCTTAAGCTCTGGCGTGGTACTTGTCACGGTCTGCCGGGGCCGGATTAAA	0.000222198
na	na	ATTGGCGCCAGGCCGCCGCCCGGCTTAAGCTCTGGTATGATACTTGTCTCGGTCTGCCGGGGCCGGATTGGA	0.000222198
na	na	ATTGGCGCCAGGCCGCCGCCCGGCTTAAGCTCTGGTGTGATATTTGTCGCGGTCCGCCGGGGCCGGATTAAA	0.000222198
na	na	ATTGGCGCCAGGCCGCCGCCCGGCTTAAGCTCTGGCATGGTATTTGTCACGGTCCGCCGGGGCCGGATTGAA	0.000222198
na	na	ATTGGCGCCAGGCCGCCGCCCGGCTTAAGCTCTGGTGTGGTACTTGTCTCGGTCCGCCGGGACCGGATTGGA	0.000222198
na	na	ATTGGCGCCAGGCCGCCGCCCGGCTTAAGCTCTGGCGTGATACTCGTCGCGGTCCGCCGGGGCCGGATTGGA	0.000222198
na	na	ATTGGCGCCAGGCCGCCGCCCGGCTTAAGCTCTGGCGTGATACTTGTCCCGGTCCGCCGGGGCCGGATTGGA	0.000222198
na	na	ATTGGCGCCAGGCCGCCGCCCGGCTTAAGCTCTGATGTGATACTTGTCTCGGTCTGCCGGGGCCGGATTGAA	0.000222198
na	na	ATTGGCGCCAGGCCGCCGCCCGGCTTAAGCTCTGACGTGATACTTGTCACGGTCCGCCGGGGCCGGATTAGA	0.000222198
na	na	ATTGGCGCCAGGCCGCCGCCCGGCTTAAGCTCTGGCGTGGTATTCGTCTCGGTCCGCCGGGGCCGGATTGAA	0.000222198
na	na	ATTGGCGCCAGGCCGCCGCCCGGCTTAAGCTCTGGCGTGATACTTGTCCCGGTCCGCCGGGGCCGGATTGAA	0.000222198
na	na	ATTGGCGCCAGGCCGCCACCCGGCTTAAGCTCTGGCGTGGTAGTTGTCACGGTCCGCCGGGGCCGGATTAAA	0.000222198
na	na	ATTGGCGCCAGGCCGCCGCCCGGCTTAAGCTCTGGCGTGGTACTTGTCACGGTCTGCCGGGACCGGATTAAA	0.000222198
na	na	ATTGGCGCCAGGCCGCCGCCCGGCTTAAGCTCTGGCGTGATATTTGTCACGGTCCGCCAGGGCCGGATTAGA	0.000222198
na	na	ATTGGCGCCAGGCCGCCGCCCGGCTTAAGCTCTGGTGTGATACTTGTCTCGATCTGCCGGGGCCGGATTGGA	0.000222198
na	na	ATTGGCGCCAGGCCGCCGCCCGGCTTAAGCTCTGGTGTGATATTTGTCTCGGTCTGCCGGGACCGGATTGGA	0.000222198
na	na	ATTGGCGCCAGGCCGCCGCCCGGCTTAAGCTCTGACGTGGTACTTGTCACGGTCCGCCGGGGCCGGATTGGA	0.000222198
na	na	ATTGGCGCCAGGCCGCCGCTCGGCTTAAGCTCTGGCGTGGTATTTGTCACGGTCCGCCGGGGCCGGATTAAA	0.000222198
na	na	ATTGGCGCCAGGCCGCCGCCCGGCTTAAGCTCTGATGTGATACTTGTCTCGGTCTGCCGGGGCCGGATTGGA	0.000222198
na	na	ATTGGCGCCAGGCCGCCGCCCGGCTTAAGCTCTGGTGTGATACTTGTCACGGTCTGCCGGGACCGGATTGGA	0.000222198
na	na	ATTGGCGCCAGGCCGCCGCCCGGCTTAAGCTCTGGCGTGGTACTTGTCACGGTCCGCCAGGGCCGGATTGGA	0.000222198
na	na	ATTGGCGCCAGGCCGCCGCCCGGCTTAAGCTCTGGTATGATACTTGTCTCGGTCTGCCGGGGCCGGATTGAA	0.000222198
na	na	ATTGGCGCCAGGCCGCCGCCCGGCTTAAGCTCTGGCGTGATACTCGTCACAGTCCGCCGGGGCCGGATTAAA	0.000222198
na	na	ATTGGCGCCAGGCCGCCGCCCGGCTTAAGCTCTGGCGTGGTACTCGTCACGGTCTGCCGGGGCCAGATTAAA	0.000222198
na	na	ATTGGCGCCAGGCCGCCGCCCGGCTTAAGCTCTGACGTGGTACTTGTCTCGGTCCGCCGGGGCCGGATTAAA	0.000222198
na	na	ATTGGCGCCAGGCCGCCGCCCGGCTTAAGCTCTGGCGTGATGCTTGTCTCGGTCCGCCGGGGCCGGATTAAA	0.000222198
na	na	ATTAGCGCCAGGCCGCCGCCCGGCTTAAGCTCTGGCGTGGTACTTGTCTCGGTCCGCCGGGGCCGGATTAGA	0.000222198
na	na	ATTGGCGCCAGGCCGCCGCCCGGCTTAAGCTCTGGCGTGGTACTTGTCACGGTCAGCCGGGGCCGGATTAAA	0.000222198
na	na	ATTGGCGCCAGGCCGCCGCCCGGCTTAAGCTCTGGTGTGACACTCGTCACGGTCCGCCGGGGCCGGATTAAA	0.000222198
na	na	ATTGGCGCCAGGCCGCCACCCGGCTTAAGCTCTGGTGTGGTATTTGTCACGGTCCGCCGGGGCCGGATTGGA	0.000222198
na	na	ATTGGCGCCAGGCCGCCGCCCGGCTTAAGCTCTGGTGTGGTACTTGTCCCGGTCCGCCAGGGCCGGATTAAA	0.000222198
na	na	ATTGGCACCAGGCCGCCGCCCGGCTTAAGCTCTGGTGTGGTACTTGTCACGGTCCGCCGGGGCCGGATTAAA	0.000222198
na	na	ATTGGCGCCAGGCCGCCGCCCGGCTTAAGCTCTGACATGGTACTTGTCACGGTCTGCCGGGGCCGGATTAAA	0.000222198
na	na	ATTGGCGCCAGGCCGCCGCCCGGCTTGAGCTCTGGCGTGGTACTTGTCACGGTCCGCCGGGGCCGGATTAGA	0.000222198
na	na	ATTGGCGCCAGGCCGCCGCCCGGTTTAAGCTCTGGCGTGGTACTTGTCACGGTCCGCCGGGGCCGGATTAAA	0.000222198
na	na	ATTGGCGCCAGACCGCCGCCCGGCTTAAGCTCTGGTGTGGTACTCGTCACGGTCCGCCGGGGCCGGATTAAA	0.000222198
na	na	ATTGGCGCCAGGCCGCCACCCGGCTTAAGCTCTGGCGTGGTATTTGTCACGGTCCGCCGGGGCCGGATTGGA	0.000222198
na	na	ATTGGCGCCAGGCCGCCGCCCGGCTTAAGCTCTGGTGTGGTACTTGTCCCGGTCTGCCGGGGCCGGATTAAA	0.000222198
na	na	ATTGGCGCCAGGCCGCCGCCCGGCTTAAGCTCTGGCGTGATATTTGTCACGGTCTGCCGGGGCCGGATTGAA	0.000222198
na	na	ATTGGCGCCAGGCCGCCGCCCGGCTTAAGCTCTGGCGTGATACTCGTCCCGGTCCGCCGGGGCCGGATTAGA	0.000222198
na	na	ATTGGCGCCAGGCCGCCGCCCGGCTTAAGCTCTGGCGTGATATTTGTCCCGGTCTGCCGGGGCCGGATTAGA	0.000222198
na	na	ATTGGCGCCAGGCCGCCGCCCGGCTTAAGCTCTGGCGTGGTATTCGTCACGGTCCGCCGGGGCCGGATTGGA	0.000222198
na	na	ATTGGCGCCAGGCCGCCGCCCGGCTTAAGCTCTGATGTGATACTTGTCTCGGTCTGCCGGGGCCGGATTAGA	0.000222198
na	na	ATTGGCGCCAGGCCGCCGCCCGGCTTAAGCTCTGGCGTGATATTCGTCTCGGTCTGCCGGGGCCGGATTGAA	0.000222198
na	na	ATTGGCGCCAGGCCGCCGCCCGGCTTAAGCTCTGGCGTGATACTCGTCACGGCCCGCCGGGGCCGGATTAAA	0.000222198
na	na	ATTGGCGCCAGGCCGCCGCCCGGCTTAAGCTCTGGCGTAATACTTGTCACGGTCCGCCGGGGCCGGATTAAA	0.000222198
na	na	ATTGGCGCCAGGCCGCCGCCCGGCTTAAGCTCTGGCGTGATACTCGTCCCGGTCCGCCGGGGCCGGATTAAA	0.000222198
na	na	ATTGGCGCCAGGCCGCCGCCCGGCTTAAGCTCTGGCGTGATATTTGTCCCGGTCCGCCGGGGCCGGATTAAA	0.000222198
na	na	ATTGGCGCCAGGCCGCCGCCTGGCTTAAGCTCTGGCGTGATACTTGTCACGGTCCGCCGGGGCCGGATTAGA	0.000222198
na	na	ATTGGCGCCAGGCCGCCGCCCGGCTTAAGCTCTGACGTGGTACTTGTCTCGGTCTGCCGGGGCCGGATTAAA	0.000222198
na	na	ATTGGCGCCAGGCCGCCGCCCGGCTTAAGCTCTGGCGTGATACTTGTCTCGGTCTGCCGGGGCCAGATTGGA	0.000222198
na	na	ATTGGCGCCAGGCCGCCGCCCGGCTTAAGCTCTGGCATGATATTTGTCACGGTCTGCCGGGGCCGGATTAAA	0.000222198
na	na	ATTGGCGCCAGGCCGCCGCCCGGCTTAAGCTCTGGTGTGGTATTTGTCGCGGTCCGCCGGGGCCGGATTAAA	0.000222198
na	na	ATTGGCGCCAGGCCGCCGCCCGGCTTAAGCTCTGGCGTGATGTTCGTCACGGTCCGCCGGGGCCGGATTGAA	0.000222198
na	na	ATTGGCGCCAGGCCGCCGCCCGGCTTAAGCTCTGATGTGATACTTGTCTCGGTCCGCCGGGGCCGGATTGGA	0.000222198
na	na	ATTGACGCCAGGCCGCCGCCCGGCTTAAGCTCTGGCGTGGTATTTGTCACGGTCCGCCGGGGCCGGATTAAA	0.000222198
na	na	ATTGGCGCCAGGCCGCCGCCCGGCTTAAGCTCTGGTGTGATACTTGTCACGGTCTGCCGGGGTCGGATTAAA	0.000222198
na	na	ATTGGCGCCAGGCCGCCGCCCGGCTTAAGCTCTGATGTGGTACTTGTCACGGTCCGCCGGGGCCGGATTGAA	0.000222198
na	na	ATTGGCGCCAGGCCGCCGCCCGGCTTAAGCTCTGACATGGTATTTGTCACGGTCCGCCAGGGCCGGATTAGA	0.000222198
na	na	ATTGGCGCCAGGCCGCCACCCGGCTTAAGCTCTGGCGTGGTACTTGTCACGGTCCGCCGGGGCCGGATTGGA	0.000222198
na	na	ATTGGCGCCAAGCCGCCGCCCGGCTTAAGCTCTGGCGTGGTACTCGTCACGGTCTGCCGGGGCCGGATTAGA	0.000222198
na	na	ATTGGCGCCAGGCCGCCACCCGGCTTAAGCTCTGGTGTGATACTTGTCTCGGTCTGCCGGGGCCGGATTGAA	0.000222198
na	na	ATTGGCGCCAGGCCGCCACCCGGCTTAAGCTCTGGCGTGATACTTGTCTCGGTCTGCCGGGGCCGGATTAAA	0.000222198
na	na	ATTGGCGCCAGGCCGCCGCCCGGCTTAAGCTCTAGCGTGGTACTTGTCTCGGTCTGCCGGGGCCGGATTAGA	0.000222198
na	na	ATTGGCGCCAGGCCGCCGCCCGGCTTAAGCTCTGGGGTGGTACTTGTCACGGTCCGCCGGGGCCGGATTAGA	0.000222198
na	na	ATTGGCGCCAGGCCGCCGCCCGGCTTAAGCTCTGGCGTGACACTCGTCTCGGTCCGCCGGGGCCGGATTAAA	0.000222198
na	na	ATTGGCGCCAGGCCGCCGCCCGGCTTAAGCTCTGGTGTGGTACTTGTCACGGTCTGCCGGGACCGGATTAAA	0.000222198
na	na	ATTGGCGCCAGGCCGCCGCCCGGCTTAAGCTCTGGCGTGGTACTCGTCACGGTCCGCCGGGACCGGATTGAA	0.000222198
na	na	ATTGGCGCCAGGCCGCCGCCCGGCTTAAGCTCTGGCGTGATACTTGTCATGGTCCGCCGGGGCCGGATTAAA	0.000222198
na	na	ATTGGCGCCAGGCCGCCACCCGGCTTAAGCTCTGGCATGGTACTTGTCACGGTCCGCCGGGGCCGGATTAGA	0.000222198
na	na	ATTGGCGCCAGGCCGCCGCCCGGCTTAAGCTCTGGCGTGATATTTGTCGCGGTCCGCCGGGGCCGGATTGAA	0.000222198
na	na	ATTGGCGCCAGGCCGCCGCCCGGCTTAAGCTCTGGCGTGGTACTTGTCACGGTTTGCCGGGGCCGGATTGGA	0.000222198
na	na	ATTGGCGCCAGGCCGCCGCCCGGCTTAAGCTCTGACGTGGTACTTGTCACGGTCTGCCGGGGCCGGATTAGA	0.000222198
na	na	ATTGGCGCCAGGCCGCCACCCGGCTTAAGCTCTGGCGTGATACTTGTCACGGTCCGCCGGGGCCGGATTAGA	0.000222198
na	na	ACTGGCGCCAGGCCGCCGCCCGGCTTAAGCTCTGGCGTGGTACTCGTCACGGTCCGCCGGGGCCGGATTGGA	0.000222198
na	na	ATTGGCGCCAGGCCGCCGCCCGGCTTAAGCTCTGGCGTGGTACTTGTCCCGGTCTGCCGGGGCCGGATTGGA	0.000222198
na	na	ACTGGCGCCAGGCCGCCGCCCGGCTTAAGCTCTGGTGTGGTACTTGTCACGGTCTGCCGGGGCCGGATTAAA	0.000222198
na	na	ATTGGCGCCAGGCCGCCGCCCGGCTTAAACTCTGGCGTGATATTTGTCACGGTCTGCCGGGGCCGGATTAGA	0.000222198
na	na	ATTGGCGCCAGGCCGCCACCCGGCTTAAGCTCTGGCGTGATACTTGTCTCGGTCTGCCGGGGCCGGATTAGA	0.000222198
na	na	ATTGGCGCCAGGCCGCCGCCCGGCTTAAGCCCTGGTGTGGTACTCGTCACGGTCCGCCGGAGCCGGATTAAA	0.000219394
na	na	ATTGGCGCCAGGCCGCCGCCCGGCTTAAGTCCTGGTGTGGTACTCGTCACGGTCCGCCGGGGCCGGATTAAA	0.000219394
na	na	ATTGGCGCCAGGCCGCCGCCCGGCTTAAGCCCTGGTGTGGTACTCGTCACGGTCCGCCGGGGCCGGATTAAG	0.000219394
na	na	ATTGGCGCCAGGCCGCCACCCGGCTTAAGCTCCGACATAGTGTTTGTCAGGGTCCGCCGGGGCCGGATTAAG	0.000216638
na	na	ATTGGCGCCAGGCCGCCACCCGGCTTAAGCTCCGACATAGTATTTGTCACGGTCCGCCGGGACCGGATTAAA	0.000216638
na	na	ATTGGCGCCAGGCCGCCACCCGGCTTAGGCTCCGACATAGTGTTTGTCACGGTCCGCCGGGGCCGGATTAAA	0.000216638
na	na	ATTGGCGCCAGGCCGCCACCCGGCTTAAGCTCCGACGTAGTGTTTGTCAGGGTCCGCCGGGGCCGGATTAAA	0.000216638
na	na	ATTGGCGCCAGGCCGCCACCCGGCTCAAGCTCCGACATAGTGTTTGTCACGGTCCGCCGGGGCCGGATTAAA	0.000216638
na	na	ATTGGCGCCAGGCCGCCACCCGGCTGAAGCTCCGACATAGTGTTTGTCACGGTCCGCCGGGACCGGATTAAA	0.000216638
na	na	ATTGGCGCCAGGCCGCCACCCGGCTTAAGCTCCGACATAGTGTTTGTCAGGGTCCGCCGAGGCCGGATTAAA	0.000216638
na	na	ATTGGCGCCAGGCCGCCACCCAGCTTAAGCTCCGACATAGTGTTTGTCACGGTCCGCCGGGGCCGGATTAAA	0.000216638
na	na	ATTGGCGCCAGGCCGCCACCCGGCTTAAGCTCCGACATAGTGTTCGTCACGGTCCGCCGGGGCCGGATTAAA	0.000216638
na	na	ATTGGCGTCAGGCCGCCACCCGGCTGAAGCTCCGACATAGTGTTTGTCACGGTCCGCCGGGGCCGGATTAAA	0.000216638
na	na	ATTGGCGCCAGGCCGCCACCCGGCTGAAGCTCCGACATAGTGTTTGTCAGGGTCCGCCGGGGCCGGATTAAA	0.000216638
na	na	ATTGGCGCCAGGCCGCCACCCGGCTTAAGCTCCGACATAGTGTTTGTCACGGTCCGTCGGGGCCGGATTAAA	0.000216638
na	na	ATTGGCGCCAGGCCGCCACCCGGCTGAAGCTCCGACATAGTGTTTGTCATGGTCCGCCAGGGCCGGATTAAA	0.000216638
na	na	ATTGGCGCCAGGCCGCCACCCGGCTTAAGCTCCGATATAGTGTTTGTCACGGTCCGCCGGGGCCGGATTAAA	0.000216638
na	na	ATTGGCGCCAGGCCGCCACCCGGCTGAAGCTCCGACATAGTGTTTGTCACGGTCCGCCAGGACCGGATTAAA	0.000216638
na	na	ATTGGCGTCAGGCCGCCACCCGGCTTAAGCTCCGACATAGTGTTTGTCAAGGTCCGCCGGGGCCGGATTAAA	0.000216638
na	na	ATTGGCGCCAGGCCGCCACCCGGCTTAAGCTCCGACATAGTGTTTGTCACGGTCCGCCGGGACCGGATTAAG	0.000216638
na	na	ATTGGCGTCAGGCCGCCACCCGGCTTAAGCTCCGACATAGTGTTTGTCAGGGTCCGCCAGGGCCGGATTAAA	0.000216638
na	na	ATTGGCACCAGGCCGCCGCCCTGCTTAAGCCCTGGCGTGGTGCTCGTCACGGTCCGCCGGGGCCGGACTAAA	0.000208117
na	na	ATTGGCACCAGGCCGCCGCCCGGCTTAAGCCCTGGCGTGGTACTTGTCACGGTCCGCCGGGGCCGGATTAAA	0.000208117
na	na	ATTGGCGCCAGGCCGCCGCCCGGCTTAAGCCCTGGCGTGGTACTCGTCACGATCCGCCGAGGCCGGATTAAA	0.000208117
na	na	ATTGGCACCAGGCCGCCGCCCTGCTTAAGCCCTGGCGTGGTACTCGTCACGGTTCGCCGGGGCCGGATTAAA	0.000208117
na	na	ATTGGCACCAGGCCGCCGCCCTGCTTAAGCCCTGGCGTGGTACTCGTCATGGTCCGCCGGGGCCGGATTAAA	0.000208117
na	na	ATTGGCACCAGGCCGCCGCCCTGCTTAAGCCCTGGCGTGGTACTCGTCACGGTCCCCCGGGGCCGGATTAAA	0.000208117
na	na	ATTGGCACCAGGCCGCCGCCCGGCTTAAACCCTGGCGTGGTACTCGTCACGGTCCGCCGGGGCCGGATTAAA	0.000208117
na	na	ATTGGCGCCAGGCCGCCGCCCTGCTTAAGCCCTGGCGTGGTACTCGTCACGGTCCGCCAGGGCCGGATTAAA	0.000208117
na	na	ATTGGCACCAGGCCGCCGCCCTGCTTAAGCCCTGGTGTGGTACTCGTCACGGTCCGCCGGGGCCGGATTAAA	0.000208117
na	na	ATTAGCACCAGGCCGCCGCCCTGCTTAAGCCCTGGCGTGGTACTCGTCAAGGTCCGCCGAGGCCGGATTAAA	0.000195733
na	na	ACTGGCACCAGGCCGCCGCCCTGCTTAAGCCCTGGCGTGGTACTCGTCAGGATCCGCCGAGGCCGGATTAAA	0.000195733
na	na	ATTGGCACCAGACCGCCGCCCTGCTTAAGCCCTGGCGTGGTACTCGTCAGGATCCGCCGAGGCCGGATTAAA	0.000195733
na	na	ATTGGCACCAGGCCGCCGCCCTGCTTAAGCCCTGGCGTGGTACTCGTCAGGATCCGCCAGGGCCGGATTAAA	0.000195733
na	na	ATTGGCACCAGGCCGCCGCCCTGCTTAAGCCCTGGCGTGGTACTCGTCAGGGTCCGCCAAGGCCGGATTAAA	0.000195733
na	na	ATTAGCACCAGGCCGCCGCCCTGCTTAAGCCCTGGCGTGGTACTCGCCAGGATCCGCCGAGGCCGGATTAAA	0.000195733
na	na	ATTGGCACCAGGCCGCCGCCCTGCTTTAGCCCTGGCGTGGTACTCGTCAGGATCCGCCGGGGCCGGATTAAA	0.000195733
na	na	ATTGGCACCAGGCCGCCGCCCTGCTTGAGCCCTGGCGTGGTACTCGTCAGGATCCGCCGAGGCCGGATTAAA	0.000195733
na	na	ACTGGCGCCAGGCCGCCGCCCGGCTTAAGCCCTGGTGTGGTACTCGTCACGGTCCGCCGAGGCCGGATTAAA	0.00019015
na	na	ATTGGCGCCAGGCCACCGCCCGGCTTAAGCCCTGGTGTGGTACTCGTCACGATCCGCCGGGGCCGGATTAAA	0.00019015
na	na	ATTGGCGCCAGGCCGCCGCCCGGCTTAAGCCCTGGTGTGGTACTCGTCAGGATCCGCCGAGGCCGGATTAAA	0.00019015
na	na	ATTGGCGCCAGGCCGCCGCCCGGCTTAAGCCCTGGTGTGGTACTCGTCAGGATCCGCCGGGGCCGGATTAAA	0.00019015
na	na	ATTGGCGCCAGGCCGCCGCCCGGCTTAAGCCCTGGTGTGGTACTTGTCAGGGTCCGCCGAGGCCGGATTAAA	0.00019015
na	na	ACTGGCGCCAGGCCGCCGCCTGGCTTAAGCCCTGGTGTGGTACTCGTCACGGTCCGCCGGGGCCGGATTAAA	0.00019015
na	na	ACTGGCACCAGGCCGCCGCCCGGCTTAAGCCCTGGTGTGGTACTCGTCACGGTCCGCCGGGGCCGGATTAAA	0.00019015
na	na	ATTGGCGCCAGACCGCCGCCCGGCTTAAGCCCTGGTGTGGTACTCGTCACGGTCCGCCGGGGCCGGATTAAA	0.00019015
na	na	ATTGGCGCCAGGCCGCCGCCCGGCTTAAGCCCTGGTGTGGTACTCGTCACGGTCCGCCGGGGCCGGGTTAAA	0.00019015
na	na	ACTGGCGCCAGGCCGCCGCCCGGCTTAAGCTCTGGTGTGGTACTCGTCACGGTCCGCCGGGGCCGGATTAAA	0.00019015
na	na	ATTGGCGCCAGGCCGCCGCCCGGCTTAAGCCCTGGTGTGGTACTCGTCACGGTCCGCCGGGGCCAGATTAAA	0.00019015
na	na	ATTGGCGCCAGGCCGCCGCCCGGCTTAAGCCCTGGTGTAGTACTCGTCACGGTCCGCCGGGGCCGGATTAAA	0.00019015
na	na	ATTGGCGCCAGGCCGCCACCCGACTTAAGCTCTGGCGTGGTATTTGTCACGGTCCGCCGGGGCCGGATTAAA	0.000187617
na	na	ATTGGCGCCAGGCCGCCGCCCGGCTTAAGCTCTGACGTGGTATTTGTCACGGTCCGCCAGGGCCGGATTAAA	0.000187617
na	na	ATTGGCGCCAGGCCGCCGCCCGGCTTAAGCTCTGGCATGGTGTTTGTCACAGTCCGCCGGGGCCGGATTAAA	0.000187617
na	na	ATTGGCGCCAGGCCGCCACCCGGCTTAAGCTCTGACGTAGTGTTTGTCACGGTCCGCCGGGGCCGGATTAAA	0.000187617
na	na	ATTGGCGCCAGGCCGCCACCCGGCTTAAGCTCTGGCATGGTACTCGTCACGGTCCGCCAGGGCCGGATTAAA	0.000187617
na	na	ATTGGCGCCAGGCCGCCACCCGGCTTAAGCTCTGACGTAGTATTTGTCACGGTCCGCCGGGGCCGGATTAAA	0.000187617
na	na	ATTGGCGCCAGGCCGCCACCCGGCTTAAGCTCTGGCGTGGTGTTCGTCACGGTCCGCCGGGGCCGGGTTAAA	0.000187617
na	na	ATTGGCGCCAGGCCGCCACCCGGCTTAAGCTCTGGCATGATGTTTGTCACGGTCCGCCGGGGCCGGATTAAA	0.000187617
na	na	ATTGGCGCCAGGCCGCCACCCGGCTTAAGCTCTGACGTGGTGCTTGTCACGGTCCGCCGGGGCCGGATTAAA	0.000187617
na	na	ATTGGCGCCAGGCCGCCACCCGGCTTAAGCTCTGACGTGGTACTTGTCACGGTCCGCCGAGGCCGGATTAAA	0.000187617
na	na	ATTGGCGCCAGGCCGCCACCCGGCTTAAGCTCTGGCATGATATTTGTCACGGTCCGCCGGGGCCGGATTAAA	0.000187617
na	na	ATTGGCGCCAGGCCGCCACCCGGCTTAAGCTCTGGCGTGGTATTCGTCACGGTCCGCCGGGGCCGGGTTAAA	0.000187617
na	na	ATTGGCGCCAGGCCGCCACCCGGCTTAAGCTCTGACGTGGTATTTGTCACGGTCCGCCGAGGCCGGATTAAA	0.000187617
na	na	ACTGGCGCCAGGCCGCCACCCGGCTTAAGCTCTGGCGTGGTATTTGTCACGGTCCGCCGGGGCCGGGTTAAA	0.000187617
na	na	ATTGGCGCCAGGCCGCCACCCGGCTTAAGCTCTGACATGATATTTGTCACGGTCCGCCGGGGCCGGATTAAA	0.000187617
na	na	ATTGGCGCCAGGCCGCCACCCGGCTTAAGCTCTGGCATGGTACTTGTCAGGATCCGCCGGGGCCGGATTAAA	0.000187617
na	na	ATTGGCGCCAGGCCGCCACCCGGCTTAAGCTCTGGCGTGGTACTTGTCACGATCCGCCAGGGCCGGATTAAA	0.000187617
na	na	ATTGGCGCCAGGCCGCCGCCCGGCTTAAGCTCTGACGTGGTGTTTGTCAGGGTCCGCCGGGGCCGGATTAAA	0.000187617
na	na	ACTGGCGCCAGGCCGCCACCCGGCTTAAGCTCTGACATGGTGCTTGTCACGGTCCGCCGGGGCCGGATTAAA	0.000187617
na	na	ATTGGCGCCAGGCCGCCACCCGGCTTAAGCTCTGACATGGTATTTGTCACGGTCCACCGGGGCCGGATTAAA	0.000187617
na	na	ATTGGCGCCAGGCCGCCACCCGGCTTAAGCTCTGGCATGGTACTTGTCAAGGTCCGCCGGGGCCGGATTAAA	0.000187617
na	na	ACTGGCGCCAGGCCGCCACCCGGCTTAAGCTCTGGCATAGTATTTGTCACGGTCCGCCGGGGCCGGATTAAA	0.000187617
na	na	ATTGGCGCCAGGCCGCCACCCGGCTTAAGCTCTGGCGTAGTGTTTGTCACGGTCCGCCGGGGCCGGATTAAA	0.000187617
na	na	ATTGGCGCCAGGCTGCCACCCGGCTTAAGCTCTGACATGGTATTTGTCACGGTCCGCCGGGGCCGGATTAAA	0.000187617
na	na	ATTGGCGCCAGGCCGCCACCCGGCTTAAGCTCTGGCATAGTATTTGTCACGGTCCGCCAGGGCCGGATTAAA	0.000187617
na	na	ATTGGCGCCAGGCCGCCACCCGGCTTAAGCTCTGGCATGGTACTCGTCACGGTCCGCCGGGGCCGGATTAAA	0.000187617
na	na	ATTGGCGCCAGGCCGCCACCCGGCTTAAGCTCTGACATGGTATTTGTCAGGGTCCGCCGAGGCCGGATTAAA	0.000187617
na	na	ATTGGCGCCAGGCCGCCACCCGGCTTAAGCTCTGACATGGTATCTGTCACGGTCCGCCAGGGCCGGATTAAA	0.000187617
na	na	ATTGGCGCCAGGCCGCCACCCGGCTTAAGCTCTGACGTGGTGTTCGTCACGGTCCGCCGGGGCCGGATTAAA	0.000187617
na	na	ATTGGCGCCAGGTCGCCACCCGGCTTAAGCTCTGGCGTGGTATTCGTCACGGTCCGCCGGGGCCGGATTAAA	0.000187617
na	na	ACTGGCGCCAGGCCGCCACCCGGCTTAAGCTCTGACATGGTATTCGTCACGGTCCGCCGGGGCCGGATTAAA	0.000187617
na	na	ATTGGCGCCAGGCCGCCACCCGGCTTAAGCTCTGGCATGGCACTTGTCACGGTCCGCCGGGGCCGGATTAAA	0.000187617
na	na	ATTGGCGCCAGGCCGCCACCCGGCTTAAGCTCTGACATGGTATTTGTCACGATCCGCCAGGGCCGGATTAAA	0.000187617
na	na	ATTGGCGCCAGGCCGCCACCCGGCTTAAGCTCTGGCGTGGTGTTCGTCACGGTCCGCCGGGACCGGATTAAA	0.000187617
na	na	ATTGGCGCCAGGCCGCCGCCCGGCTTAAGCTCTGACATGGTATTTGTCACGGTCCGCCAGGGCCGGATTAAA	0.000187617
na	na	ATTGGCACCAGGCCGCCACCCGGCTTAAGCTCTGGCGTGGTGTTTGTCACGGTCCGCCGGGGCCGGATTAAA	0.000187617
na	na	ATTGGCGCCAGGCCGCCACCCGGCTTAAGCTCTGGCGTGGTATTTGTCACGGTCCGCCGGGGCCGAATTAAA	0.000187617
na	na	ATTGGCGCCAGGCCGCCACCCGGCTTAAGCTCTGGCATGGTATTTGTCACGGTCTGCCGGGGCCGGATTAAA	0.000187617
na	na	ATTGGCGCCAGGCCGCCGCCCGGCTTAAGCTCTGACATGGTGTTCGTCACGGTCCGCCGGGGCCGGATTAAA	0.000187617
na	na	ATTGGCGCCAGGCCGCCACCCGACTTAAGCTCTGACATGGTATTTGTCACGGTCCGCCGGGACCGGATTAAA	0.000187617
na	na	ATTGGCGCCAGGCCACCACCCGGCTTAAGCTCTGGCATGGTATTTGTCACGGTCCGCCGGGGCCGGATTAAA	0.000187617
na	na	ATTGGCGCCAGGCCGCTGCCCGGCTTAAGCCCTGGTGTGGTATTCGTCACGGTCCGCCGGGGCCGGATTAAA	0.000182448
na	na	ACTGGCGCCAGGCCGCCACCCGGCTTAAGCTCTGACATGGCATTTCTCAGGATCCGCCAGGACCGGATTAAA	0.00017696
na	na	ACTGGCGCCAGGCCGCCACCCGGCTTAAGCTCTGACATGGCATTTCTCAAGGTCCGCCAGGACCGGATTAAA	0.00017696
na	na	ACTGGCGCCAGGCCGCCACCCGGCTCAAGCTCTGACATGGCATTTCTCAGGGTCCGCCAGGACCGGATTAAA	0.00017696
na	na	ACTGGCGCCAGGCCGCCACCCGGCTTAAGCTGTGACATGGCATTTCTCAGGGTCCGCCAGGACCGGATTAAA	0.00017696
na	na	ACTGGCGCCAGGCCGCCACCCGGCTTTAGCTCTGACATGGCATTTCTCAGGATCCGCCAGGACCGGATTAAA	0.000170648
na	na	ATTGGCACCAGACCGCCGCCCTGCTTAAGCCCTGGCGTGGTACTCGTCACGGTCCGCCGGGGCCGGATTAAA	0.000163372
na	na	ATTGGCACCAGGCCGCCGCCCTGCTTAAGCCCTGGCGTGGTACTCATCACGGTCCGCCAGGGCCGGATTAAA	0.000163372
na	na	ATTGGCACCAGGCCGCCGCCCGGCTTAAGCCCTGGCGTGGTACTCGTCAGGGTCCGCCGAGGCCGGATTAAA	0.00016
na	na	ATTAGCACCAGGCCGCCGCCCTGCTTAAGCCCTGGCGTGGTACTCGTCAGGATCCGCCGGGGCCGGATTAAA	0.00016
na	na	ATTGGCGCCAGGCCGCCGCCCGGCTTAAGCCCTGGCGTGGTACTTGTCAGGATCCGCCGAGGCCGGATTAAA	0.00016
na	na	ATTGGCACCAGGCCGCCGCCCTGCTTAAGCCCTGGCGTAGTACTCGTCAGGATCCGCCGAGGCCGGATTAAA	0.00016
na	na	ACTGGCGCCAGGCCGCCACCCGGCTGTAGCTCTGACATGGCATTTCTCAGGGTCCGCCGGGACCGGATTAAA	0.000136351
na	na	ATTGGCGCCAGGCCGCCGCCCTGCTTAAGCTCTGGCGTGGTACTCGTCACGGTCCGCCGGGGCCGGATTAAA	0.000133583
na	na	ATTGGCGCCAGGCCGCCGCCCGGCTTAAGCCCTGGCGTGGTACTTGTCACGGTCCGCCGAGGCCGGATTAAA	0.000133583
na	na	ATTGGCGCCAGGCCGCCGCCCGGCTTAAGCCCTGGCGTGGTACTCGTCATGGTCCGCCGGGGCCGGATTAAA	0.000133583
na	na	ATTGGCGCCAGGCCGCCGCCCGGCTTAAGCCCTGGCGTGGTACTCGTCACGGTCCGCCGGAGCCGGATTAAA	0.000133583
na	na	ATTGGCGCCAGGCCGCCGCCCGGCTTAAGCCCTGGCGTGGTACCTGTCACGGTCCGCCGGGGCCGGATTAAA	0.000133583
na	na	ATTGGCGCCAGGCCGCCGCCCGGCTTAAGCCCTGGCGTGGTACTCGTCACAGTCCGCCGGGGCCGGATTAAA	0.000133583
na	na	ATTGGCGCCAGGCCGCCGCCCGGCTTAAGCCCTGGTGTGGTACTTGTCACGATCCGCCGGGGCCGGATTAAA	0.000133583
na	na	ATTGGCGCCAGGCCGCCGCCCGGCTTAAGCCCTGGCGTGGTACTTGTCACGGTCCGCCAGGGCCGGATTAAA	0.000133583
na	na	ATTGGCGCCAGGCCGCCGCCCGGCTTAAACCCTGGCGTGGTACTCGTCACGGTCCGCCGGGGCCGGATTAAA	0.000133583
na	na	ATTGGCACCAGGCCGCCGCCTGGCTTAAGCCCTGGCGTGGTACTCGTCACGGTCCGCCGGGGCCGGATTAAA	0.000133583
na	na	ATTGGCGCCAGGCCGCCGCCCGGCTTAAGCCCTGACGTGGTACTCGTCACGGTCCGCCGGGGCCGGATTAAA	0.000133583
na	na	ATTGGCGCCAGGCCGCCGCCCGGCTTAAGCCCTGGCGTGGTACTCGTCACGGTCCGCCGGGACCGGATTAAA	0.000133583
na	na	ATTGGCGCCAGGCCGCCGCCCGGCTTAAGCCCTGGCGTGGTACTCGTCAAGGTCCGCCGGGGCCGGATTAAA	0.000133583
na	na	ATTGGCGCCAGGCCGCCGCCCGGCTTGAGCCCTGGCGTGGTACTCGTCACGGTCCGCCGGGGCCGGATTAAA	0.000133583
na	na	ATTGGCGCCAGGCCGCCGCCCGGCTTAAGCCCTGGCGTGGTACTCGTCACGGTCCGCCGGGGTCGGATTAAA	0.000133583
na	na	ATTGGCGCCAGGCCGCCGCCCGGCTTAAGCCCTGGTGTGGTACTTGTCACGGTCCGCCGGGACCGGATTAAA	0.000133583
na	na	ATTGGCGCCAGGCCGCCGCCCGGCTTAAGCCCTGGTGTGGTACTCGTCAGGGTCCGCCGAGGCCGGATTAAA	0.000133583
na	na	ATTGGCGCCAGGCCGCCGCCCGGCTTAAGCCCTGGTGTGGTATTTGTCACGGTCCGCCGGGGCCGGATTAAA	0.000133583
na	na	ATTGGCGCCAGGCCGCCGCCCGGCTTAAGCCCTGGCGTGGTACTCGTCACGGTCCACCGGGGCCGGATTAAA	0.000133583
na	na	ACTGGCGCCAGGCCGCCGCCCGGCTTAAGCCCTGGCGTGGTACTTGTCACGGTCCGCCGGGGCCGGATTAAA	0.000133583
na	na	ATTGGCGCCAGGCCGCCGCCCGGCTTAAGCCCTGGCGTGGTACTTGTCAGGGTCCGCCGGGGCCGGATTAAA	0.000133583
na	na	ATTGGCGCCAGGCCGCCGCCCGGCTTAAGCTCTGGCGTAATGTTCGTCACGGTCCGCCGGGGCCGGATTAAA	0.00012108
na	na	ATTGGCGCCAGGCCGCCGCCCGGCTTAAGCTCTGGCGTGATGTTCGTCACGGTCCGCCGGGGCCAGATTAAA	0.00012108
na	na	ATTGGCGCCAGGCCGCCGCCCGGCTTAAGCTCTGGCGTGATGTTCGTCAGGGTTCGCCAGGACCGGATTAAA	0.00012108
na	na	ATTGGCGCCAGGCCGCCGCCCGGCTTAAGCTCTGGCGTGGTGTTCGTCAGGGTCCGCCGGGACCGGATTAAA	0.00012108
na	na	ATTGGCGCCAGGCCGCCGCCCGGCTTAAGCTCTGGCGTGATGTTTGTCACGATCCGCCGGGGCCGGATTAAA	0.00012108
na	na	ATTGGCGCCAGGCCGCCGCCCGGCTTAAGCTCTGGCGTGATATTCGTCATGGTCCGCCGGGGCCGGATTAAA	0.00012108
na	na	ATTGGTGCCAGGCCGCCGCCCGGCTTAAGCTCTGGCGTGATGTTCGTCACGGTCCGCCGGGGCCGGATTAAA	0.00012108
na	na	ATTGGCGCCAGGCCGCCGCCCGGCTTAGGCTCTGGCGTGATGTTCGTCACGGTCCGCCGGGACCGGATTAAA	0.00012108
na	na	ATTGGCGCCAGGCCGCCGCCCGGCTTAAGCTTTGGCGTGATGTTCGTCACGGTCCCCCGGGACCGGATTAAA	0.00012108
na	na	ATTGGCGCCAGGCCGCCGCCCGGCTTAAGCTCTGGCGTGATGCTCGTCATGGTCCGCCGGGGCCGGATTAAA	0.00012108
na	na	ATTGGCGCCAGGCCGCCGCCCGGCTTAAGCTCTGGCGTGATGTTCGTCACGGTTTGCCAGGACCGGATTAAA	0.00012108
na	na	ATTGGCGCCAGGCCGCCGCCCGGCTTAAGCTCTGGCGTGATGTTCGTCACGGTCCGCCGGGGCCGAATTAAA	0.00012108
na	na	ATTGGCGCCAGGCCGCCGCCCGGCTTAAGCTCTGGCGTGATGTTCGTCACGATTCGCCGGGGCCGGATTAAA	0.00012108
na	na	ATTGGCGCCAGGCCGCCGCCCGGCTTAAGCTCTGGCGTGATATTCGTCACGGTTCGCCGGGACCGGATTAAA	0.00012108
na	na	ATTGGCGCCAGGCCGCCGCCCGGCTTAAGCTCTGGCGTGATGTTCGTCAGGGTCCCCCAGGGCCGGATTAAA	0.00012108
na	na	ATTAGCGCCAGGCCGCCGCCCGGCTTAAGCTCTGGCGTGATGTTCGTCACGGTCCGCCGGGACCGGATTAAA	0.00012108
na	na	ATTGGCGCCAGGCCGCCGCCCGGCTTAAGCTCTGGCATGGTGTTCGTCACGGTCCGCCGGGGCCGGATTAAA	0.00012108
na	na	ATTGGCGCCAGGCCGCCGCCCGGCTTAAGCTCTGGCGTGGTGCTCGTCACGGTCCGCCAGGGCCGGATTAAA	0.00012108
na	na	ATTGGCGCCAGGCCGCCGCCCGGCTTAAGCTCTGGCGTGATGTTCGTCATGGTCTGCCAGGGCCGGATTAAA	0.00012108
na	na	ATTGGCGCCAGGCCGCCGCCCGGCTTAAGCTCTGGCGTGATGTTCGTCAGGGTCCGCCAGGGCCGGATTGAA	0.00012108
na	na	ATTGGCACCAGGCCGCCGCCCGGCTTAAGCTCTGGCGTGATGTTCGTCACGGTCCGCCGGGGCCGGATTAAA	0.00012108
na	na	ATTGGCGCCAGGCCGCCGCCCGGCTTAAGCTCTGGCGTGGTGTTTGTCACGGTTCGCCGGGGCCGGATTAAA	0.00012108
na	na	ATTGGCGCCAGGCCGCCGCCCGGCTTAAGCTCTGGCGTGATGTTCGTCATGGTCTGCCGGGGCCGGATTAAA	0.00012108
na	na	ATTGGCGCCAGGCCGCCGCCCGGCTTAAGCTCTGACGTGATATTCGTCACGGTCCGCCGGGGCCGGATTAAA	0.00012108
na	na	ATTGGCGCCAGGCCGCCGCCCGGCTTAAGCTCTGGCGTAATGTTCGTCACGGTCTGCCGGGGCCGGATTAAA	0.00012108
na	na	ATTGGCGCCAGGCCGCCGCCCGGCTTAAGCTCTGGCGTGGTGTTTGTCACGGTCCGCCAGGGCCGGATTAAA	0.00012108
na	na	ATTGGCGCCAGGCCGCCGCCCGGCTTAAGCTCTGGCGTGATGTTCGTTACGGTCCGCCGGGGCCGGATTAAA	0.00012108
na	na	ATTGGCGCCAGGCCGCCGCCCGGCTTAAGCTCTGGCGTGATGTTCGTCACGGTCCGCCGGGGCTGGATTAAA	0.00012108
na	na	ATTGGCGCCAGGCCGCCGCCCGGCTTAAGCTCTGGCGTGGTATTCGTCACGGTCCCCCGGGGCCGGATTAAA	0.00012108
na	na	ATTGGCGCCAGGCCGCCGCCCGGCTTAAGCTCTGGCGTGGTGTTCGTCAGGGTCCGCCAGGACCGGATTAAA	0.00012108
na	na	ATTGGCGCCAGGCCGCCGCCCGGCTTAAGCTCTGGTGTGATGTTCGTCAGGGTCCGCCGGGACCGGATTAAA	0.00012108
na	na	ATTGGCGCCAGGCCGCCGCCCGGCTTAAGCTCTGGCGTGATGTTCGTCAGGGTCTGCCGGGACCGGATTAAA	0.00012108
na	na	ATTGGCGCCAGGCCGCCGCCCGGCTTAAGCTCTGGCGTGATGTTCGTCACGGTCTCCCAGGGCCGGATTAAA	0.00012108
na	na	ATTGGCGCCAGGCCGCCGCCCGGCTTAAGTTCTGGCGTGATGTTCGTCACGGTCCGCCGGGGCCGGATTAAA	0.00012108
na	na	ATTGGCGCCAGGCCGCCGCCCGGCTTAAGCTCTGGCGTGATGTTCGTCACGATCCGCCGGGACCGGATTAAA	0.00012108
na	na	ATTGGCGCCAGGCCGCCGCCCGGCTTAAGCTCTGGCGTGGTGTTCGTCAGGGTCCGCCAGGGCCGGATTAAA	0.00012108
na	na	ATTGGCGCCAGGCCGCCGCCCGGCTTAAGCTCTGACGTGGTATTCGTCACGGTCCGCCAGGGCCGGATTAAA	0.00012108
na	na	ATTGGCGCCAGGCCGCCGCCCGGCTTAAGCTCTGGCGTGATGTTCGTCATGGTCTGCCAGGACCGGATTAAA	0.00012108
na	na	ATTGGCGCCAGGCCGCCGCCCGGCTTAAGCTCTGGCATGATGTTCGTCACGGTCTGCCGGGGCCGGATTAAA	0.00012108
na	na	ATTGGCGCCAGGCCGCCGCCCGGCTTAAGCTCTGGCGTGATGTTCGTCAGGGTTCGCCGGGACCGGATTAAA	0.00012108
na	na	ATTGGCGCCAGGCCGCCGCCCGGCTTAAGCTCTGGCGTGGTGTTTGTCACGGTCTGCCGGGGCCGGATTAAA	0.00012108
na	na	ATTGGCGCCAGGCCGCCACCCGGCTTAAGCTCTGGCGTGATGTTCGTCACGGTTCGCCAGGACCGGATTAAA	0.00012108
na	na	ATTGGCGCCAGGCCGCCGCCCGGCTTAAGCTCTGGCGTGATATTCGTCATGGTTCGCCGGGACCGGATTAAA	0.00012108
na	na	ATTGGCGCCAGGCCGCCACCCGGCTTAAGCTCTGGCGTGATGTTCGTCACGGTCCGCCAGGACCGGATTAAA	0.00012108
na	na	ATTGGCGCCAGGCCGCCGCCCGGCTTAACCTCTGGCGTGATGTTCGTCACGGTCCGCCAGGGCCGGATTAAA	0.00012108
na	na	ATTGGCGCCAGGCCGCCGCCCGGCTTAAGCTCTGGCGTGGTGTTCGTCACGGTCTGCCAGGGCCGGATTAAA	0.00012108
na	na	ATTGGCGCCAGGCCGCCACCCGGCTTAAGCTCTGGCGTGATGTTCGTCACAGTCCGCCGGGGCCGGATTAAA	0.00012108
na	na	ATTGGCGCCAGGCCGCCGCCCGGCTTAAGCTCTGGCGTGATATTCGTCAGGGTCCGCCAGGGCCGGATTAAA	0.00012108
na	na	ATTGGCGCCAGGCCGCCGCCCGGCTTAAGCTCTGGCGTGATGTTCGTCACGGTCAGCCAGGGCCGGATTAAA	0.00012108
na	na	ATTGGCGCCAGGCCGCCGCCCGGCTTAAGCTTTGGCGTGATGTTCGTCACGGTCCGCCGGGGCCGGATTAAA	0.00012108
na	na	ATTGGCGCCAGGCCGCCGCCCGGCTTAAGCTCTGGCGTGATGCTCGTCAGGGTCCGCCAGGGCCGGATTAAA	0.00012108
na	na	ATTGGCGCCAGGCCGCCGCCCGGCTTAAGCTCTGGTGTGATGTTCGTCACGGTCCGCCGGGGCCGGATTAAA	0.00012108
na	na	ATTGGCGCCAGGCCGCCGCCCGGCTTAAGCTCTGGCGTAATGTTTGTCACGGTCCGCCGGGGCCGGATTAAA	0.00012108
na	na	ATTGGCGCCAGGCCGCCGCCCGGCTTAAGCTCTGGCGTGATGTTCGTCACGGTCTACCGGGACCGGATTAAA	0.00012108
na	na	ATTGGCGCCAGGCCGCCGCCCGGCTTAAGCTCTGGCGTGATGCTCGTCACGGTCTGCCAGGGCCGGATTAAA	0.00012108
na	na	ATTGGCGCCAGGCCGCCGCCCGGCTTAAGCTCTGGCGTGATATTCGTCAGGGTCCGCCGGGACCGGATTAAA	0.00012108
na	na	ATTGGCGCCAGGCCGCCGCCCGGCTTAAGCTCTGGCGTGATGTTCGTCATGGTTCGCCAGGGCCGGATTAAA	0.00012108
na	na	ATTGGCGCCAGGCCGCCACCCGGCTTAAGCTCTGGCGTGATGTTCGTCAGGGTCCGCCAGGACCGGATTAAA	0.00012108
na	na	ATTGGCGCCAGGCCGCCGCCCGGCTTAAGCTCTGGCGTGATGCTCGTCAGGGTCCGCCGGGACCGGATTAAA	0.00012108
na	na	ATTGGCGCCAGGCCGCCGCCCGGCTTAAGCTCTGGCGTGGTGTTCGTCATGGTCCGCCGGGGCCGGATTAAA	0.00012108
na	na	ATTGGCGCCAGGCCGCCGCCCGGCTTAAGCTCTGGCGTGATGTTCGTCAGGGTCCCCCGGGGCCGGATTAAA	0.00012108
na	na	ATTGGCGCCAGGCCGCCGCCCGGCTTAAGCTCTGGCGTGGTGTTCGTCACGGTCCACCGGGGCCGGATTAAA	0.00012108
na	na	ATTGGCGCCAGGCCGCCGCCCGGCTTGAGCTCTGGCGTGATGTTCGTCACGGTCCGCCGGGGCCGGATTAAA	0.00012108
na	na	ATTGGCGCCAGGCCGCCGCCCGGCTTGAGCTCTGGCGTGATATTCGTCACGGTCCGCCGGGGCCGGATTAAA	0.00012108
na	na	ATTGGCGCCAGGCCGCCACCCGGCTTAAGCTCTGGCGTGATGTTCGTCAGGGTCTGCCGGGGCCGGATTAAA	0.00012108
na	na	ATTGGCGCCAGGCCGCCGCCCGGCTTAAGCTCTGACGTGATGTTCGTCAGGGTCCGCCAGGACCGGATTAAA	0.00012108
na	na	ATTGGCGCCAGGCCGCCACCCGGCTTAAGCTCTGGCGTGATGTTCGTCAGGGTCCGCCGAGGCCGGATTAAA	0.00012108
na	na	ATTGGCGCCAGGCCGCCGCCCGGCTTAAGCTCTGGCGTGGTGTTCGTCACGGTTCGCCGGGACCGGATTAAA	0.00012108
na	na	ATTGGCGCCAGGCCGCCGCCCGGCTTAAGCTCTGGCGTGATGTTCGTCACGGTCCACCGGGACCGGATTAAA	0.00012108
na	na	ATTGGCGCCAGGCCGCCGCCCGGCTTAAGCTCTGGCGTGATGTTCGTCACGGTCTGCCGGGACCAGATTAAA	0.00012108
na	na	ATTGGCGCCAGGCCGCCGCCCGGCTTAAGCTCTGGCGTGGTATTCGTCACGGTTCGCCGGGACCGGATTAAA	0.00012108
na	na	ATTGGCGCCAGGCCGCCGCCCGGCTTAAGCTCTGGCGTGATGTTCGTCAAGGTCCGCCGGGACCGGATTAAA	0.00012108
na	na	ATTGGCGCCAGGCCGCCGCCCGGCTTAAGCTCTGGCGTGATATTCGTCAGGGTCCCCCGGGGCCGGATTAAA	0.00012108
na	na	ATTGGCGCCAGGCCGCCGCCCGGCTTAAGCTCTGGCGTGATGTTTGTCACGGTTCGCCGGGGCCGGATTAAA	0.00012108
na	na	ATTGGCACCAGGCCGCCGCCCGGCTTAAGCTCTGGCGTGATGTTCGTCACGGTCCGCCAGGACCGGATTAAA	0.00012108
na	na	ATTGGCGCCAGGCCGCCGCCCGGCTTAAGCTCTGGCGTGATGTTCGTCAAGGTTCGCCGGGGCCGGATTAAA	0.00012108
na	na	ATTGGCGCCAGGCCGCCGCCCGGCTTAAGCTCTGGCGTGATGTTCGTCACGGTTTCCCGGGACCGGATTAAA	0.00012108
na	na	ATTGGCGCCAGGCCGCCACCCGGCTTAAGCTCTGGCGTGATGTTCGTCACGGTCTGCCGGGGCCGGATTAAA	0.00012108
na	na	ATTGACGCCAGGCCGCCGCCCGGCTTAAGCTCTGGCGTGATGTTCGTCACGGTCCGCCGGGACCGGATTAAA	0.00012108
na	na	ATTGGCACCAGGCCGCCGCCCGGCTTAAGCTCTGGCGTGATGTTCGTCACGGTCCGCCGGGACCGGATTAAA	0.00012108
na	na	ATTGGCGCCAGGCCGCCGCCCGGCTTAAGCTCTGGCGTGGTGCTCGTCACGGTCTGCCAGGACCGGATTAAA	0.00012108
na	na	ATTGGCGCCAGGCCGCCGCCCGGCTTAAGCTCTGGCGTGATATTCGTCACGGTCCCCCGGGGCCGGATTAAA	0.00012108
na	na	ATTGGCGCCAGGCCGCCGCCCGGCTTAAGCTCTGGCGTGATGTTCGTCAGGGTCCGCCGGGACCGGATTGAA	0.00012108
na	na	ATTGGCGCCAGGCCGCCGCCCGGCTTAAGCTCTGGCGTGATATTCGTCACGATCCGCCGGGGCCGGATTAAA	0.00012108
na	na	ATTGGCGCCAGGCCGCCGCCCGGCTTAAGCTCTGGCGTGGTGTTCGTCACGGTCCCCCGGGGCCGGATTAAA	0.00012108
na	na	ACTGGCGCCAGGCCGCCGCCCGGCTTAAGCTCTGGCGTGATGTTCGTCACGGTTTGCCGGGGCCGGATTAAA	0.00012108
na	na	ATTGGCGCCAGGCCGCCGCCCGGCTTAAGCTCTGGCGTGGTGTTCGTCACGATCCGCCGGGACCGGATTAAA	0.00012108
na	na	ATTGGCGCCAGGCCGCTGCCCGGCTTAAGCTCTGGCGTGATGTTCGTCACGGTCCGCCAGGGCCGGATTAAA	0.00012108
na	na	ATTGGCGCCAGGCCGCCGCCCGGCTTAAGCTCTGGCGTGATGTTTGTCAGGGTCCGCCGGGGCCGGATTAAA	0.00012108
na	na	ATTGGCGCCAGGCCGTCGCCCGGCTTAAGCTCTGGCGTGATGTTCGTCACGGTCCGCCAGGGCCGGATTAAA	0.00012108
na	na	ATTGGCGCCAGGCCGCCGCCCGACTTAAGCTCTGGCGTGATGTTCGTCACGGTCTGCCGGGGCCGGATTAAA	0.00012108
na	na	ATTGGCGCCAGGCCGCCGCCTGGCTTAAGCTCTGGCGTGATGTTCGTCACGGTCTCCCGGGACCGGATTAAA	0.00012108
na	na	ATTGGCGCCAGGCCGCCGCCCGGCTTAAGCTCTGGCGTGATGTTCGTCAGGGTTTCCCGGGGCCGGATTAAA	0.00012108
na	na	ATTGGCGCCAGGCCGCCGCCCGGCTTAAGCTCTGGCGTGATATTCGTCATGGTCCGCCAGGACCGGATTAAA	0.00012108
na	na	ATTGGCGCCAGGCTGCCGCCCGGCTTAAGCTCTGGCGTGATGTTCGTCACGGTCCGCCGGGGCCGGATTAAA	0.00012108
na	na	ATTGGCGCCAGGCCGCCGCCCGGCTTAAGCTCTGGCGTGATGCTCGTCAGGGTCCGCCGGGGCCGGATTAAA	0.00012108
na	na	ATTGGCGCCAGGCCGCCGCCCGGCTTAAGCTCTGGCGTGATATTCGTCAGGGTCCACCGGGGCCGGATTAAA	0.00012108
na	na	ATTGGCGCCAGGCCGCCGCCCGGCTTGAGCTCTGGCGTGATATTTGTCACGGTCCGCCGGGACCGGATTAAA	0.00012108
na	na	ATTGGCGCCAGGCCGCCGCCCGGCTTAAGCTCTGGCGTGATGTTCGTCATGGTCCGCCGGGACCGGATTAAA	0.00012108
na	na	ATTGGCGCCAGGCCGCCGCCCGGCTTAAGCTCTGGCATGATGTTCGTCACGGTCCCCCAGGACCGGATTAAA	0.00012108
na	na	ATTGGCGCCAGGCCGCCGCCCGGCTTAAGCTCTGGCGTGATGTTCATCACGGTCCGCCAGGACCGGATTAAA	0.00012108
na	na	ATTGGCGCCAGGCCGCCGCCCGGCTTAGGCTCTGGCGTGATGTTCGTCACGGTCCGCCGGGGCCGGATTAAA	0.00012108
na	na	ACCGGCGCCAGGACGCCATCCGGCTTTAGCTCTGGCATGGTATTTCTCAAGGTCCGCCGGGGCCGGATTAAA	0.000118666
na	na	ACCGGCGCCAGGGCGTCACCCGGCTTTAGCTCTGACATGGTATTTCTCACGGTCCGCCGGGGCCGGATTAAA	0.000118666
na	na	ACCGGCGCCAGGACGCCATCCGGCTTTAGCTCTGATATGGTATTTCTCAGGGTCCGCCGGGGCCGGATTAAA	0.000118666
na	na	ACCGGCGCCAGGGCGCCATCCGGCTTTAGCTCTGACATGGCACTTCTCAGGGTCCGCCGGGGCCGGATTAAA	0.000118666
na	na	ACCGGCGCCAGGGCGCCACCCGGCTTTAGCTCTGACATGGTACTTCTCAGGGTCCGCCGAGGCCGGATTAAA	0.000118666
na	na	ACCGGCGCCAGGGCGCCATCCGGCTTTAGCTCTGACATGGTATTTCTCACAGTCCGCCGAGGCCGGATTAAA	0.000118666
na	na	ACTGGCGCCAGGGCGCCATCCGGCTTTAGCTCTGGCATGGTATTTCTCACGGTCCGCCGGGGCCGGATTAAA	0.000118666
na	na	ATCGGCGCCAGGGCGCCATCCGGCTTTAGCTCTGACATGGTATTTCTCATGGTCCGCCGGGGCCGGATTAAA	0.000118666
na	na	ACCGGCGCCAGGGCGCCACCCGGCTTTAGCTCTGACATGGTATTTCTCAGGGTCCGCCGAGGCCGGATTAAA	0.000118666
na	na	ACTGGCGCCAGGGCGCCATCCGGCTTTAGCTCTGGTATGGTATTTCTCACGATCCGCCGAGGCCGGATTAAA	0.000118666
na	na	ACCGGCGCCAGGGCGCCATCCGGCTTTAGCTCTGGCATGGCATTTCTCAGGGTCCGCCGAGGCCGGATTAAA	0.000118666
na	na	ACTGGCGCCAGGGCGCCATCCGGCTTTAGCTCTGATATGGTATTTCTCACGATCCGCCGGGGCCGGATTAAA	0.000118666
na	na	ACTGGCGCCAGGGCGCCATCCGGCTTTAGCTCTGACATGGTATCTCTCACGGTCCGCCGGGGCCGGATTAAA	0.000118666
na	na	ACCGGCGCCAGGGCGCCACCCGGCTTTAGCTCTGACATGGTATTTCTCAGGGTCCGCCGGGGCCGAATTAAA	0.000118666
na	na	ATCGGCGCCAGGGCGCCATCCGGCTTTAGCTCTGGCATGGTACTTCTCAGGGTCCGCCGAGGCCGGATTAAA	0.000118666
na	na	ACCGGCGCCAGGGCGCCATCCGGCTTTAGCTCTGACATGGTACTTCTCACGGTCCGCCAGGGCCGGATTAAA	0.000118666
na	na	ATCGGCGCCAGGCCGCCATCCGGCTTTAGCTCTGATATGGTATTTCTCACGGTCCGCCGGGGCCGGATTAAA	0.000118666
na	na	ACCGGCGCCAGGGCGCCATCCGGCTTCAGCTCTGACATGGTATTTCTCACGGTCCGCCGGGGCCGGATTAAA	0.000118666
na	na	ACCGGCGCCAGGGCGCCATCCGGCTTTAGCTCTGACATGGTATTTCTCACGATCCGCCGAGACCGGATTAAA	0.000118666
na	na	ATCGGCGCCAGGGCGCCATCCGGCTTTAGCTCTGATATGGTATTTCTCAGGATCCGCCGAGGCCGGATTAAA	0.000118666
na	na	ACCGGCGCCAGGGCGCCATCCGGCTTTAGCTCTGACATGGTATTTCTCACGGTCCGCCGGGGCCGGGTTAAA	0.000118666
na	na	ATCGGCGCCAGGGCGTCATCCGGCTTTAGCTCTGACATGGTATTTCTCAGGGTCCGCCAGGGCCGGATTAAA	0.000118666
na	na	ATCGGCGCCAGGGCGCCATCCGGCTTTAGCTCTGGCATGGTATTTCTCACGATCCGCCGGGGCCGGATTAAA	0.000118666
na	na	ACCGGCGCCAGGGCGCCATCCGGCTTTAGCTCTGACATGGTAGTTCTCACGGTCCGCCGAGGCCGGATTAAA	0.000118666
na	na	ACCGGCGCCAGGGCGCCATCCGGCTTTAGCTCTGACATGGCATTTCTCACGGTCCGCCGGGGCCGAATTAAA	0.000118666
na	na	ACCGGCGCCAGGCCGCCACCCGGCTTTAGCTCTGACATGGCATTTCTCACGGTCCGCCGGGGCCGGATTAAA	0.000118666
na	na	ACCGGCGCCAGGCCGCCACCCGGCTTTAGCTCTGACATGGCATTTCTCAGGGTCCGCCAGGACCGGATTAAA	0.000118666
na	na	ACTGGCGCCAGGGCGCCACCCGGCTTTAGCTCTGACATGGTATTTCTCAGGATCCGCCGAGGCCGGATTAAA	0.000118666
na	na	ATCGGCGCCAGGGCGCCATCCGGCTTTAGCTCTGACATGGTATTTCTCAGGGTCCGCCGAGGCCAGATTAAA	0.000118666
na	na	ACCGGCGCCAGGCCGCCACCCGGCTTTAGCTCTGACATGGTATTTCTCACGGTCCGCCAGGGCCGGATTAAA	0.000118666
na	na	ACCGGCGCCAGGGCGCCATCCGGCTTTAGCTCTGATATGGTACTTCTCACGATCCGCCGAGGCCGAATTAAA	0.000118666
na	na	ACTAGCGCCAGGGCGCCACCCGGCTTTAGCTCTGACATGGTATTTCTCACGGTCCGCCGGGGCCGGATTAAA	0.000118666
na	na	ATCGGCGCCAGGGCGCCATCCGGCTTTAGCTCTGACATGGTATTTCTCAAGGTCCGCCGGGGCCGGATTAAA	0.000118666
na	na	ATTGGCGCCAGGGCGCCATCCGGCTTTAGCTCTGACATGGTATTTCTCAGGGTCCGCCGAGGCCGGATTAAA	0.000118666
na	na	ACCGGCGCCAGGGCGCCATCCGGCTTTAGCTCTGGCATGGTATTTCTCACGGTCCGCGGGGGCCGGATTAAA	0.000118666
na	na	ACCGGCGCCAGGGCGCCATCCGGCTTTAGCTCTGACATGGTACCTCTCACGGTCCGCCGGGGCCGGATTAAA	0.000118666
na	na	ATCGGCGCCAGGGCGTCATCCGGCTTTAGCTCTGACATGGTATTTCTCACGGTCCGCCGGGGCCGGATTAAA	0.000118666
na	na	ACCGGCGCCAGGGCGCCATCCGGCTTTAGCTCTGACATGGTATTTCTCACAGTCCGCCGGGGCCGGATTAAA	0.000118666
na	na	ACTGGCGCCAGGGCGCCATCCGGCTTTAGCTCTGACATGGTATTTCTCAGGGTCCGCCAGGGCCGGATTAAA	0.000118666
na	na	ATTGGCGCCAGGACGCCATCCGGCTTTAGCTCTGACATGGTATTTCTCAGGGTCCGCCGGGGCCGGATTAAA	0.000118666
na	na	ACCGGTGCCAGGGCGTCATCCGGCTTTAGCTCTGATATGGTATTTCTCACGGTCCGCCGGGGCCGGATTAAA	0.000118666
na	na	ACTGGCGCCAGGGCGCCATCCGGCTTTAGCTCTGATATGGTATTTCTCACGGTCCGCCGGGACCGGATTAAA	0.000118666
na	na	ACCGGCGCCAGGGCGCCATCCGGCTTTAGCTCTGATATGGTATTTCTCACGGTCCGCCGGGGCCGGATTGAA	0.000118666
na	na	ACCGGCGCCAGGGCGCCATCCGGCTTTAGCTCTGACATGGTATTTCTCGCGGTCCGCCGGGGCCGGATTAAA	0.000118666
na	na	ACCGGCGCCAGGGCGCCATCCGTCTTTAGCTCTGACATGGTATTTCTCACGGTCCGCCGGGGCCGGATTAAA	0.000118666
na	na	ACCGGCGCCAGGGCGCCATCCGGCTTTAGCTCTGGCATAGTATTTCTCACGGTCCGCCGGGGCCGGATTAAA	0.000118666
na	na	ACCGGCGCCAGGGCGCCATCCGGCTTTAGCTCTGACATGGTACTTCTCGCGGTCCGCCGGGGCCGGATTAAA	0.000118666
na	na	ACCGGCGCCAGGGCGCCATCCGGCTTTAGCTCTGACATAGTATCTCTCAGGGTCCGCCGGGGCCGGATTAAA	0.000118666
na	na	ACCGGCGCCAGGGCGTCATCCGGCTTTAGCTCTGGCATGGTATTTCTCACGGTCCGCCGGGGCCGGATTAAA	0.000118666
na	na	ACCGGCGCCAGGCCGCCATCCGGCTTTAGCTCTGACATGGTATTTCTCACGGTCCGCCAGGGCCGGATTAAA	0.000118666
na	na	ACTGGCGCCAGGGCGCCATCCGGCTTTAGCTCTGATATGGTACTTCTCACGGTCCGCCGGGGCCGGATTAAA	0.000118666
na	na	ATCGGCGCCAGGGCGCCATCCGGCTTTAGCTCTGACATGGTATTTCTCACGGTCCGCGGGGGCCGGATTAAA	0.000118666
na	na	ATCGGCGCCAGGGCGCCATCCGGCTTTAGCTCTGATATGGTGTTTCTCACGGTCCGCCGAGGCCGGATTAAA	0.000118666
na	na	ACCGGCGCCAGGGCGCCATCCGGCTTTAGCTCTGGCATGGTATTTCTCAGGGTCCGCCGAGGCCGGATTAAA	0.000118666
na	na	ACCGGCGCCAGGGCGCCATCCGGCTTTAGCTCTGACATGGCATTTCTCAGGGTCCGCCAGGGCCGGATTAAA	0.000118666
na	na	ATCGGCGCCAGGCCGCCATCCGGCTTTAGCTCTGACATGGTATTTCTCACGGTCCGCCGAGGCCGGATTAAA	0.000118666
na	na	ACTGGCGCCAGGGCGCCATCCGGCTTTAGCTCTGGCATGGTATTTCTCACGGTCCGCCAAGGCCGGATTAAA	0.000118666
na	na	ACCGGCGCCAGGCCGCCATCCGGCTTTAGCTCTGACATGGTATTTCTCACGATCCGCCGGGGCCGGATTAAA	0.000118666
na	na	ACCGGCGCCAGGGCGCCATCCGGCTTTAGCTCTGATATGGTACTTCTCACGATCCGCCGGGGCCGGATTAAA	0.000118666
na	na	ACCGGCGCCAGGGCGCCATCCGGCTTTAGTTCTGATATGGTATTTCTCACGGTCCGCCGGGGCCGGATTAAA	0.000118666
na	na	ACTGGCGCCAGGGCGTCATCCGGCTTTAGCTCTGACATGGTATTTCTCACGGTCCGCCGGGGCCGGATTAAA	0.000118666
na	na	ACCGGCGCCAGGGCGTCATCCGGCTTTAGCTCTGATATGGTATTTCTCAGGGTCCGCCGGGGCCGGATTAAA	0.000118666
na	na	ACCGGCGCCAGGGCGCCATCCGGCTTTAGCTCTGGCATGGTATTTCTCAGGGTCCGCCGGGACCGGATTAAA	0.000118666
na	na	ACCGGCGCCAGGACGCCATCCGGCTTTAGCTCTGACATGGTATTTCTCAGGGTCCGCCGAGGCCGGATTAAA	0.000118666
na	na	ACCGGCGCCAGAGCGCCATCCGGCTTTAGCTCTGACATGGTATTTCTCAGGGTCCGCCGGGGCCGGATTAAA	0.000118666
na	na	ATCGGCGCCAGGCCGCCATCCGGCTTTAGCTCTGACATGGTATTTCTCAGGGTCCGCCGGGGCCGGATTAAA	0.000118666
na	na	ATCGGCGCCAGGGCGCCATCCGGCTTTAGCTCTGACATGGTATTTCTCAGGGTCCGCGGGGGCCGGATTAAA	0.000118666
na	na	ACCGGCGCCAGGGCGCCATCCGGCTTTAGCTCTGATATGGTACTTCTCACGATCCGCCGAGGCCGGATTAAA	0.000118666
na	na	ATCGGCGCCAGGGCGCCATCCGGCTTTAGCTCTGGTATGGTATTTCTCACGATCCGCCGGGGCCGGATTAAA	0.000118666
na	na	ACCGGCGCCAGGGCGCCATCCGGCTTTAGCTCTGATATGGTATTTCTCAGGATCCGCCGGGGCCGAATTAAA	0.000118666
na	na	ACCGGCGCCAGGGCGCCATCCGGCTTTAGCTCTGATATGGTATTTCTCACGGTCCGCCGGGACCGGATTAAA	0.000118666
na	na	ACCGGCGCCAGGGCGCCATCCGGCTTTAGCTCTGACATGGTATTTCTCACGGTCCGCTGGGGCCGGATTAAA	0.000118666
na	na	ACTGGCGCCAGGGCGCCATCCGGCTTTAGCTCTGATATGGTATTTCTCAGGGTCCGCCGAGGCCGAATTAAA	0.000118666
na	na	ACCGGCGCCAGGGCGCCATCCGGCTTTAGCTCTGATATGGTACTTCTCACGGTCCGCCAGGGCCGGATTAAA	0.000118666
na	na	ACCGGCGCCAGGGCGCCATCCGGCTTTAGCTCTGACATGGTATTTCTCAGGGTTCGCCGGGGCCGGATTAAA	0.000118666
na	na	ACCGGCGCCAGGGCGCCATCCGGCTTTAGCTCTGACATGGTATCTCTCACGGTCCGCGGGGGCCGGATTAAA	0.000118666
na	na	ACCGGCGCCAGGCCGCCATCCGGCTTTAGCTCTGACATGGTATCTCTCACGGTCCGCCGGGGCCGGATTAAA	0.000118666
na	na	ACCGGCGCCAGGGCGTCATCCGGCTTTAGCTCTGACATGGTATTTCTCAGGGTCCGCCGGGACCGGATTAAA	0.000118666
na	na	ACCGGCACCAGGGCGCCATCCGGCTTTAGCTCTGATATGGTATTTCTCACGGTCCGCCGGGGCCGGATTAAA	0.000118666
na	na	ACTGGCGCCAGGGCGCCATCCGGCTTTAGCTCTGACATGGCATTTCTCAGGATCCGCCGGGGCCGGATTAAA	0.000118666
na	na	ACCGGCGCCAGAGCGCCATCCGGCTTTAGCTCTGACATGGTATTTCTCACGATCCGCCGGGGCCGGATTAAA	0.000118666
na	na	ACCGGCGCCAGGCCGCCATCCGGCTTTAGCTCTGGTATGGTATTTCTCACGGTCCGCCGGGGCCGGATTAAA	0.000118666
na	na	ACCGGCGCCAGGGCGCCATCCGGCTTTAGCTCTGACGTGGTATTTCTCACGGTCCGCCGAGGCCGGATTAAA	0.000118666
na	na	ACCGGCGCCAGGGCGCCATCCGGCTTTAGCTCTGATATGGTATTTCTCACGGTCCGCTGGGGCCGGATTAAA	0.000118666
na	na	ACCGACGCCAGGCCGCCATCCGGCTTTAGCTCTGACATGGTATTTCTCACGGTCCGCCGGGGCCGGATTAAA	0.000118666
na	na	ACCGGCGCCAGGGCGCCATCCGGCTTTAGCTCTGATATGGCATTTCTCACGGTCCGCCGGGGCCGAATTAAA	0.000118666
na	na	ACCGGCGCCAGGGCGCCATCCGGCTTTAGCTCTGACATGGTATTTCTCAGGGTCCACCGGGGCCGGATTAAA	0.000118666
na	na	ACCGGCGCCAGGGCGCCATCCGGCTTTAGCTCTGATATGGTACTTCTCACGGTCCGCCGGGGCCGAATTAAA	0.000118666
na	na	ACCGGCGCCAGGGCGCCATCCGGCTTTAGCTCTGACATGGTATTTCTCACGGTCCGCAGGGGCCGGATTAAA	0.000118666
na	na	ACCGGCGCCAGGGCGCCATCCGGCTTTAGCTCTGGCATGGTACTTCTCACGGTCCGCCAGGGCCGGATTAAA	0.000118666
na	na	ACCGGCGCCAGGGCGCCATCCGGCTTTAGCTCTGACGTGGTATTTCTCACGGTCCGCCGGGGCCGGATTAAA	0.000118666
na	na	ATCGGCGCCAGGGCGCCATCCGGCTTTAACTCTGGCATGGTATTTCTCACGGTCCGCCGGGGCCGGATTAAA	0.000118666
na	na	ACCGGCGCCAGGGCGCCATCCGGCTTTAGCTCTGATATGGTATTTCTCAGGGTCCGCCGGGACCGGATTAAA	0.000118666
na	na	ATCGGCGCCAGGGCGCCATCCGGCTTTAGCTCTGACATGGTATTTCTCAGGGTCCGCCGGGACCGGATTAAA	0.000118666
na	na	ACTAGCGCCAGGGCGCCATCCGGCTTTAGCTCTGACATGGTATTTCTCACGGTCCGCCGGGGCCGGATTAAA	0.000118666
na	na	ACCGGCGCCAGGGCGCCATCCGGCTTTAGCTCTGACATGGTATCTCTCAGGATCCGCCGGGGCCGGATTAAA	0.000118666
na	na	ACTGGCGCCAGGGCGCCATCCGGCTTTAGCTCTGATATGGCATTTCTCACGGTCCGCCGGGGCCGGATTAAA	0.000118666
na	na	ACCGGCGCCAGGGCGCCATCCGGCTTAAGCTCTGATATGGTATTTCTCACGGTCCGCCGGGGCCGGATTAAA	0.000118666
na	na	ACCGGCGCCAGGCCGCCATCCGGCTTTAGCTCTGACATGGTATCTCTCAGGGTCCGCCGGGGCCGGATTAAA	0.000118666
na	na	ATCGGCGCCAGGGCGCCATCCGGCTTTAGCTCTGGCATGGCATTTCTCACGGTCCGCCGGGGCCGGATTAAA	0.000118666
na	na	ATTGGCGCCAGGGCGCCATCCGGCTTTAGCTCTGGTATGGTATTTCTCAGGGTCCGCCGGGGCCGGATTAAA	0.000118666
na	na	ACCGGCGCCAGGGCGCCATCCGGCTTTAGCTCTGGCATGGTATTTCTCACGATCCGCCGAGGCCGGATTAAA	0.000118666
na	na	ACCGGCGCCAGGGCGCCACCCGGCTTTAGCTCTGACATGGTATTTCTCAGGGTCCGCCGAGACCGGATTAAA	0.000118666
na	na	ACCGGCGCCAGGCCGCCATCCGGCTTTAGCTCTGACATGGTATTTCTCACGATCCGCCAGGGCCGGATTAAA	0.000118666
na	na	ACCGGCGCCAGGGCGCCACCCGGCTTTAGCTCTGACATGGTATTTCTCAGGGTCCGCCGGGACCGGATTAAA	0.000118666
na	na	ACCGGCGCCAGGGCGCCATCCGGCTTTAGCTCTGACATGGTATTTCTCATGATCCGCCGGGGCCGGATTAAA	0.000118666
na	na	ATCGGCGCCAGGGCGCCATCCGGCTTTAGCTCTGATATGGTATTTCTCACGGTCCGCCGGGGCCGAATTAAA	0.000118666
na	na	ACCGGCGCCAGGGCGCCATCCGGCTTTGGCTCTGATATGGTATTTCTCACGGTCCGCCGGGGCCGGATTAAA	0.000118666
na	na	ATCGGCGCCAGGGCGCCATCCGGCTTTAGCTCTGATATGGTATTTCTCACGGTCCGCCAGGGCCGGATTAAA	0.000118666
na	na	ACCGGCGCCAGGGCGCCATCCGGCTTTAGCTTTGACATGGTATTTCTCAGGGTCCGCCGGGGCCGGATTAAA	0.000118666
na	na	ATCGGCGCCAGGGCGCCATCCGGCTTTAGCTCTGACATGGTATTTCTCGCGGTCCGCCGGGGCCGGATTAAA	0.000118666
na	na	ATCGGCGCCAGGGCGCCATCCGGCTTTAGCTCTGGCATGGTATTTCTCACGGTCCGCCAGGGCCGGATTAAA	0.000118666
na	na	ACCGGCGCCAGGCCGCCACCCGGCTTTAGCTCTGACATGGTATTTCTCACGATCCGCCGGGGCCGGATTAAA	0.000118666
na	na	ACCGGCGCCAGGGCGCCATCCGGCTTTAGCTCTGACATGGTATTTCTCACGATCCGCCGGGGCCGAATTAAA	0.000118666
na	na	ATCGGCGCCAGGGCGCCACCCGGCTTTAGCTCTGACATGGTATTTCTCACGGTCCGCGGGGGCCGGATTAAA	0.000118666
[truncated: 2,244 more rows]
